# Supplementary material for: Synthesis, catalytic activity, and photophysical properties of 5,6-membered Pd and Pt SCS′-pincer complexes based on thiophosphorylated 3-amino(hydroxy)benzoic acid thioanilides
Source: Royal Society of Chemistry journal article supplement (doi:10.1039/c0dt01154a), 2011-01-01
Supplement: c0dt01154a.pdf [file c0dt01154a.pdf]

**Supplementary data for**  
**Synthesis, catalytic activity, and photophysical properties of 5,6-membered**  
**palladium and platinum SCS'-pincer complexes based on thiophosphorylated 3-**  
**amino(hydroxy)-benzoic acid thioanilides**

*Diana V. Aleksanyan, Vladimir A. Kozlov, Yulia V. Nelyubina, Konstantin A. Lyssenko,  
Lada N. Puntus, Evgenii I. Gutsul, Nikolay E. Shepel, Andrei A. Vasil'ev, Pavel V. Petrovski, and  
Irina L. Odinet*

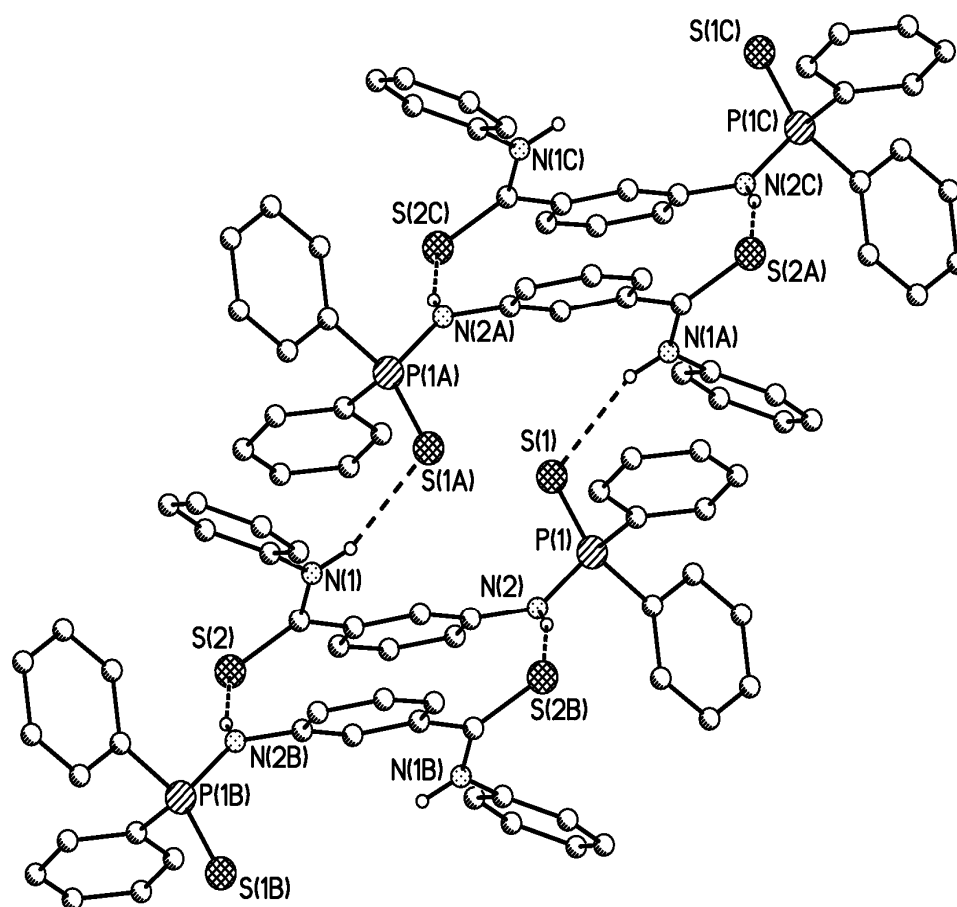

**Fig.S1.** Fragment of the infinite N-H...S-bonded tape in the crystal of **3**.

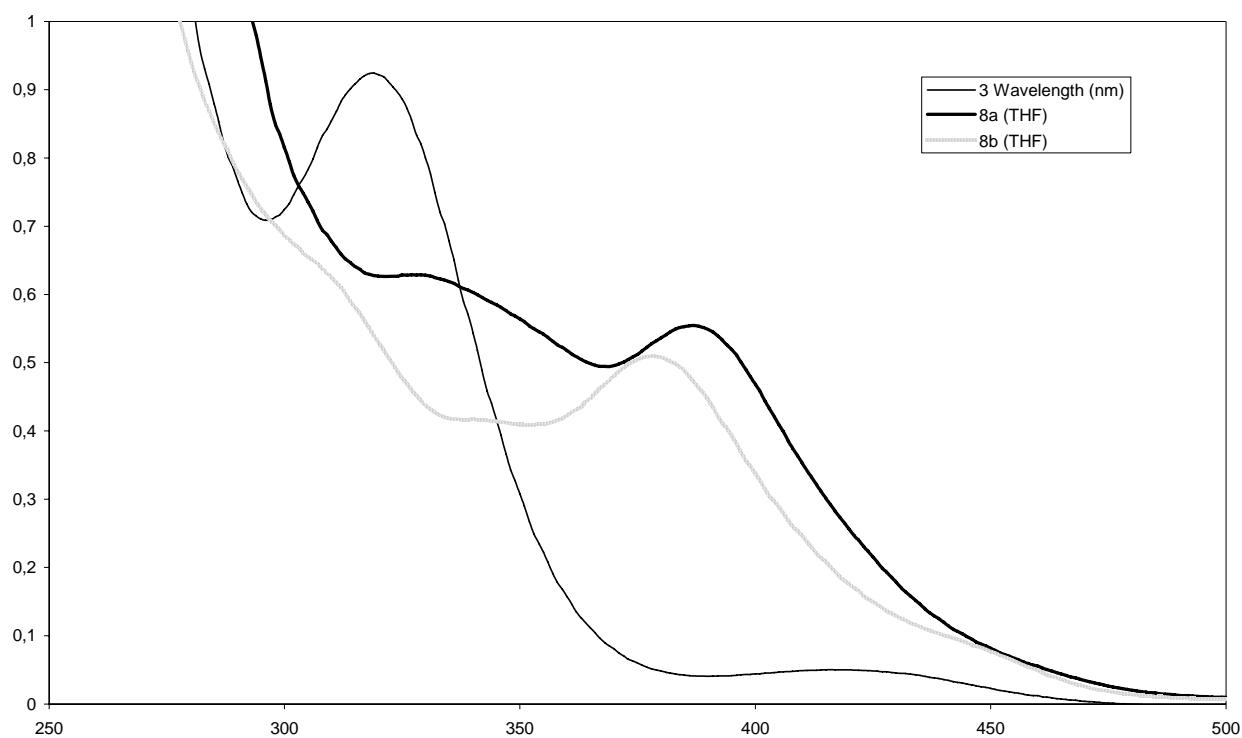

**Fig.S2.** The absorption spectra of the NH-bridged ligand **3** and its palladium and platinum pincer complexes **8a,8b** in THF at 293 K

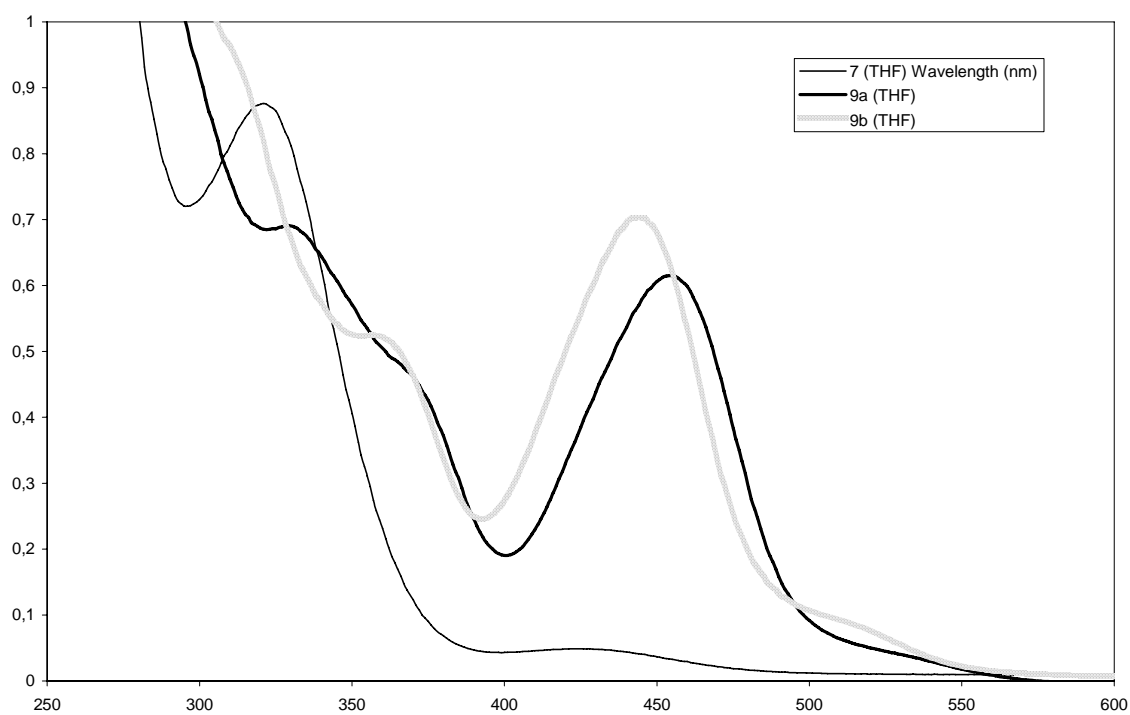

**Fig.S3.** The absorption spectra of the O-bridged ligand **7** and its palladium and platinum pincer complexes **9a,9b** in THF at 293 K

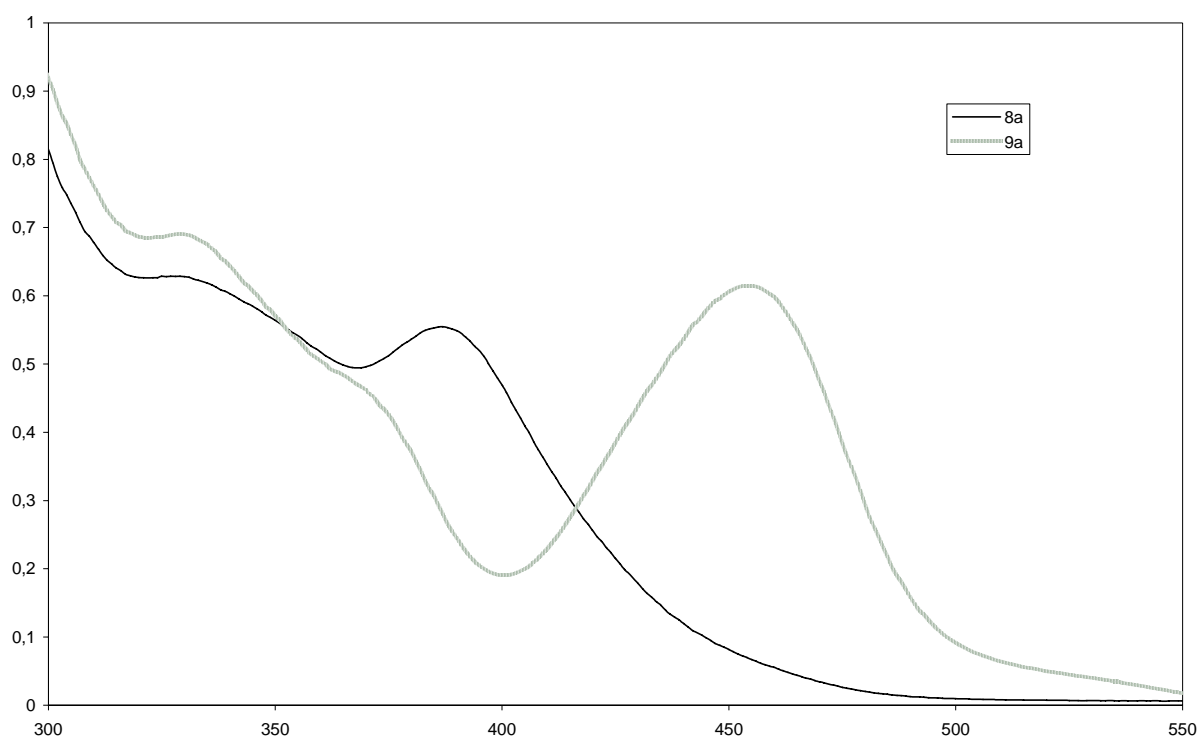

**Fig.S4.** The absorption spectra of the palladium pincer complexes **8a** and **9a** in THF at 293 K

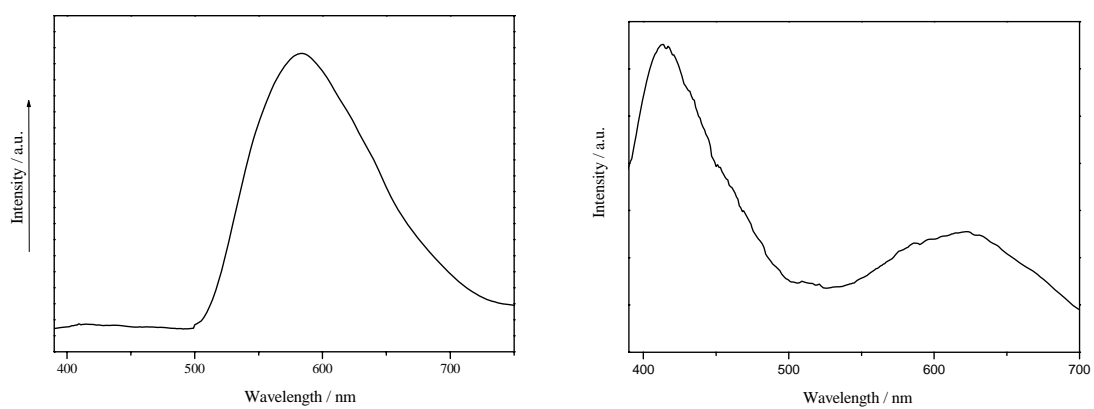

**Fig. S5.** Emission spectra of **3** (left) and **7** (right) at 77K.

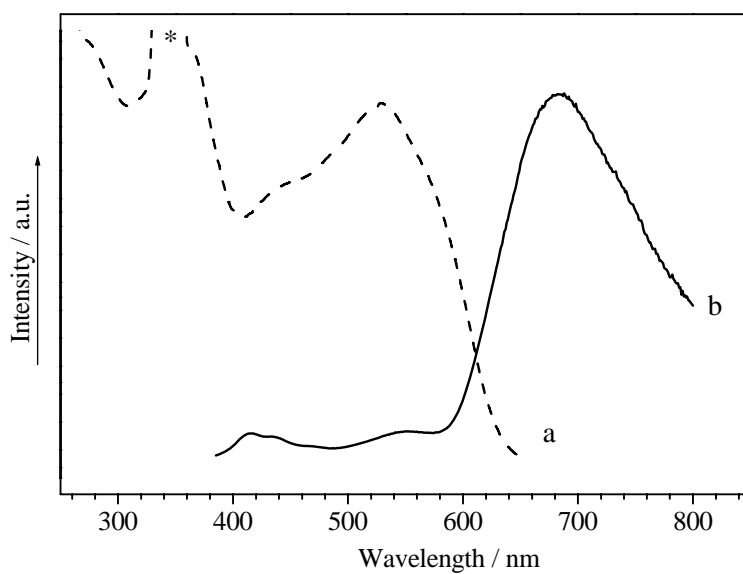

**Fig. S6.** Excitation (dash line) and luminescence (solid line) spectra of platinum complex **9b** at 77K.

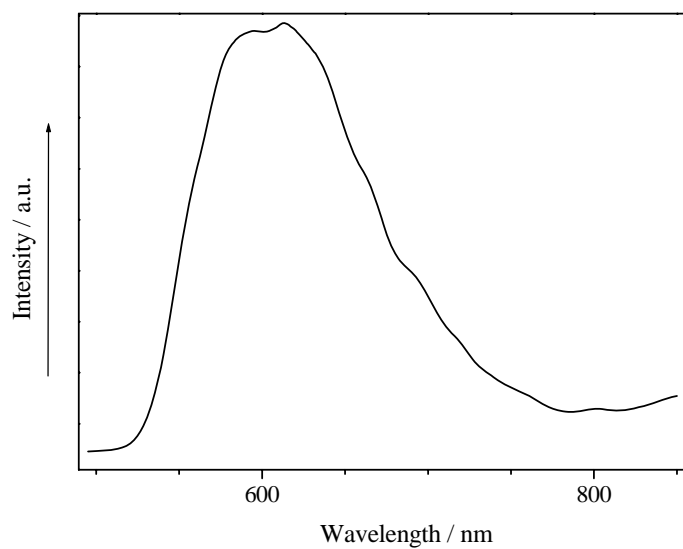

**Fig. S6.** Luminescence spectra of palladium complex **9a** at 77 K

## Results of DFT calculations

The DFT calculations were carried out at the B3LYP level using a 6-311G\*\* basis set. As convergence criteria, the extremely tight threshold limits of  $2 \cdot 10^{-6}$  and  $6 \cdot 10^{-6}$  au were applied for the maximum force and displacement, respectively. To enhance the accuracy in the DFT calculation the pruned (99,590) grid (keyword Grid=Ultrafine) has been used.

All data (geometry, frequency analysis and etc) are summarized below in the archive

```
1\1\GINC-PLANEWAVE\Freq\RB3LYP\6-311G(d,p)\C25H21N2P1S2\KOSTYA\15-Jul-2010\0\#\#P B3LYP/6-311G** geom=allcheck #freq SCF=tight\odin_lada B3LYP\0,1\P,0.3073884837,0.4609839716,0.2519113065\S,-0.4572282539,1.7096520729,1.5627606932\S,-1.0594035397,-6.6470677656,3.3293522141\N,0.5255323405,-4.7256018452,4.4073610344\H,0.6486505763,-3.7223050896,4.4493020611\N,0.4880069803,-1.1825925965,0.7204103176\H,1.4362341748,-1.3896294213,1.0062524327\C,-0.9433624721,-3.9710134561,2.7063421189\C,-0.0365322994,-3.0715892756,2.1345769385\H,1.030631214,-3.2288974558,2.2594751643\C,-0.4768478787,-2.0035216105,1.3428110308\C,-1.8516708992,-1.8193925862,1.159527297\H,-2.2209283064,-0.9900302515,0.5720795868\C,-2.7505628417,-2.7122845179,1.7365720392\H,-3.8130277275,-2.5565751826,1.5891281987\C,-2.3136783345,-3.7937804234,2.4906425843\H,-3.0146741282,-4.4953480957,2.9221787036\C,-0.6366535147,0.3705064246,-1.3187970488\C,-1.3054878277,1.5117495774,-1.7751757403\H,-1.2987797754,2.4123880862,-1.1731769503\C,-1.9897376442,1.4807042627,-2.9866784486\H,-2.5053318315,2.3684773321,-3.3345087751\C,-2.021540013,0.3112080914,-3.7440578738\H,-2.5615978177,0.2876043164,-4.6838355928\C,-1.3674334537,-0.8309407124,-3.2875394326\H,-1.4022798137,-1.7468918689,-3.8663022982\C,-0.6735723365,-0.803954556,-2.0801361109\H,-0.1826305177,-1.6984294431,-1.7173029717\C,2.0537033514,0.8134153035,-0.2067077291\C,2.7099873276,0.0571372881,-1.1874430674\H,2.1906386416,-0.739911954,-1.7055925966\C,4.0338404429,0.3369340704,-1.5128314809\H,4.5361647808,-0.2502260253,-2.2731288013\C,4.7078828757,1.3740148482,-0.8693081239\H,5.7379574126,1.5925571637,-1.1273754431\C,4.0554005764,2.1319582194,0.0996385118\H,4.5753056235,2.9417972901,0.5985287941\C,2.7309182701,1.855573646,0.4312671196\H,2.2144645512,2.4425871514,1.1814406877\C,-0.4440748265,-5.113462326,3.534781182\C,1.3468419142,-5.4105476428,5.3301668466\C,1.445187024,-6.8026406489,5.4370168754\H,0.8431903166,-7.432622543,4.8027627343\C,2.3158799064,-7.3564887818,6.3733943153\H,2.3834972628,-8.4360759122,6.446492208\C,3.0875068074,-6.5541730623,7.2078659478\H,3.7574220247,-7.0002895196,7.9333928371\C,2.9870603637,-5.1673596354,7.1012519863\H,3.5781628318,-4.5242444089,7.7430612281\C,2.1267348295,-4.6006791328,6.1723993212\H,2.0525851487,-3.5197213691,6.0964541682\Version=EM64L-G09RevA.01\State=1-A\HF=-2212.9224285\RMSD=4.535e-09\RMSF=1.707e-06\ZeroPoint=0.3977594\Thermal=0.424233\Dipole=1.6937477,0.7638983,-1.2076255\DipoleDeriv=1.7694555,-0.1659262,-0.0912654,0.1446384,2.2428576,-0.2070823,-0.2185441,-0.1610323,2.1258621,-0.597898,0.1508219,0.1426101,0.0638199,-0.822917,-0.1676766,0.1418555,-0.251441,-0.8099758,-0.4164448,-0.1389616,-0.1623242,-0.4269316,-0.9037439,-0.1650551,-0.1036154,0.1042698,-0.417916,-1.0045812,-0.0146645,-0.8951655,-0.1276679,-0.4960154,0.0213537,-0.8006936,0.1821144,-1.1025351,0.1762177,-0.0691834,-0.0045241,-0.0010523,0.1442555,-0.0039968,-0.0446227,-0.1157354,0.2409647,-0.886129,-0.6583798,0.4837015,-0.4134203,-1.7288944,0.7383514,0.4243248,0.7603259,-1.0106282,0.1561565,-0.0041664,-0.0067292,0.0576404,0.1039769,0.0516433,-0.110746,-0.0250249,0.1635369,0.1224265,-0.0408347,-0.0265663,0.092425,-0.1602118,0.0897406,-0.0895778,0.0241917,-0.0734064,-0.0882985,0.0451831,-0.0765852,-0.2617371,-0.2346843,0.0353892,0.0831011,0.2109531,-0.2694784,-0.0838787,0.0068909,-0.0104469,-0.0010965,0.0825862,0.015432,-0.0064017,-0.026173,0.1177673,0.4720654,1.1978941,-0.8136123,0.4082579,0.7966394,-0.495214,-0.3227263,-0.588888,0.4874608,-0.1730879,-0.4409685,0.3396464,0.0296042,-0.1177645,0.0146244,-0.0287781,0.0772761,-0.1664371,0.0816011,0.0592368,-0.0554333,0.0192399,-0.0065894,0.0710544,-0.0102778,0.0476025,0.0743044,0.2122714,0.0776648,-0.0562097,-0.0911652,0.1192063,-0.1645535,0.0685184,-0.1170046,0.0025258,-0.0883788,0.0202321,-0.0246046,0.0290509,0.0645995,0.0344
```

857, -0.0291748, 0.0287249, 0.0940709, -0.1449952, -0.0228489, -0.0028507, 0.1564462, -0.270065, 0.1565414, -0.0397218, 0.057993, -0.1375161, 0.063721, -0.0435117, 0.0395451, -0.0723679, 0.061525, 0.030055, 0.0184991, 0.0445103, 0.0819044, -0.3069187, 0.0392798, 0.0802966, -0.1051228, -0.3288831, -0.0311949, -0.0603004, 0.0387181, -0.4923644, -0.068573, 0.0231988, 0.0196612, -0.0865906, 0.0204708, -0.1199754, -0.0555875, 0.1678923, -0.110118, 0.1022172, -0.0024673, 0.0063007, -0.0026135, 0.0424333, -0.0475109, 0.013, -0.0788377, 0.0991478, -0.0194209, -0.1141951, 0.0223227, -0.0943399, 0.0625257, -0.0548113, 0.0513239, -0.0951379, -0.0860491, 0.0631297, 0.0806019, -0.0640637, 0.0833123, -0.0330919, 0.0495977, -0.0568775, 0.0349522, 0.0421989, -0.0361746, -0.0140329, 0.0958526, -0.0432053, -0.022714, -0.007501, 0.0893074, 0.0184841, 0.0634227, 0.0592418, 0.0132795, -0.1008722, 0.0054194, 0.082737, -0.0083801, -0.0984479, -0.003151, -0.0561982, -0.1203149, 0.0181933, -0.022122, 0.0196043, 0.0353119, 0.1192294, -0.0279641, 0.1277996, -0.058621, 0.1006151, 0.0109394, -0.0354993, 0.0012155, -0.034512, -0.0927512, -0.0374648, -0.0747392, 0.0151127, -0.1107233, -0.0948109, -0.056947, 0.0747199, -0.0024975, 0.1228832, 0.0644673, -0.1070645, -0.0667607, 0.0699765, 0.0682973, -0.0190393, 0.054921, -0.002732, 0.050521, -0.0339984, -0.0031008, 0.1287401, -0.4097923, -0.0255656, 0.0137694, 0.0924114, -0.2769135, -0.0300715, 0.0702094, 0.0484542, -0.4288919, -0.0707247, 0.1071132, 0.0933134, -0.0919185, -0.0637209, 0.1048677, -0.1028183, -0.0046701, -0.0226213, 0.0867723, -0.0614697, -0.0220187, -0.0626492, 0.0173074, -0.0554793, -0.0416684, -0.0659554, 0.0775289, -0.1080335, -0.0999491, -0.074794, -0.0874552, -0.0592545, 0.0824434, -0.0628282, 0.0914459, 0.0016902, 0.0088226, 0.0141792, 0.0705949, 0.0352287, 0.0496812, -0.086215, 0.0797535, -0.0796933, 0.0137918, 0.0884887, 0.0357021, -0.0534639, 0.065664, -0.0338031, 0.0218838, -0.0262742, 0.0461312, -0.0586103, -0.089337, -0.0509836, 0.0525612, -0.0422713, 0.0897615, -0.0095415, 0.0497874, -0.0076062, 0.0894248, -0.0437006, 0.1250724, 0.0822089, 0.0690588, 0.0519218, 0.0797876, 0.0585376, 0.0781709, -0.0421891, 0.0076964, -0.0764816, -0.013628, -0.0861032, -0.0004363, -0.074979, -0.0248797, -0.0823189, 0.0690034, -0.1321993, -0.1351994, -0.0974555, 0.1193419, -0.0131078, -0.008965, 0.116819, 0.0948008, -0.0454881, 0.1372709, 0.0606832, 0.0171403, 0.0319301, 0.0891991, -0.0329874, 0.0064723, -0.0406423, 0.0582081, 0.874469, 0.2058464, 0.9481499, 0.6795937, 1.2604488, 0.2367759, 0.783812, -0.2320233, 0.9509148, 0.4727024, -0.1721891, 0.4648328, -0.36135, 0.1885576, -0.4079242, 0.4929097, -0.2183915, 0.6649277, -0.1619951, 0.0780196, -0.0745637, 0.1073113, -0.1505663, 0.1328904, -0.0592908, 0.0524521, -0.1965165, 0.1439934, -0.0723586, 0.0159135, -0.0356535, 0.0982078, -0.0491843, -0.0068375, -0.0481798, 0.1355857, -0.0575232, 0.001149, 0.0676626, -0.0640548, 0.2109646, -0.0794078, 0.0510742, -0.003974, -0.0532124, 0.0900371, 0.0074008, -0.0397265, 0.0314869, -0.1033403, 0.037948, -0.0333594, 0.0094188, 0.0907051, -0.1059622, -0.0287708, 0.0265617, -0.0186607, -0.0904148, -0.0258402, 0.0338196, -0.0364491, -0.1112232, 0.0328665, 0.0513093, -0.1147113, 0.0483016, 0.0411853, 0.054188, -0.112192, 0.0589044, 0.009894, -0.0139964, 0.0330882, 0.1115411, 0.0935809, 0.0458998, 0.1112318, 0.1227151, 0.0397955, 0.0083179, 0.0430955, -0.0467993, -0.0959994, -0.0630849, 0.0140901, -0.0711113, -0.0909601, -0.0482908, 0.0256353, -0.1966595, 0.0271606, -0.0522544, -0.0055565, 0.0361511, -0.0001579, -0.051807, 0.0331099, -0.2155972, 0.1004313, 0.0362809, -0.0307106, 0.0318445, -0.0956278, 0.0346485, -0.0318713, 0.0370334, 0.0997074, Polar=359.3332268, 9.1458418, 386.382832, 72.72812, -51.7973556, 352.9493563, PG=C01 [X(C25H21N2P1S2)]\NImag=0\0.34757881, -0.03465555, 0.38969573, -0.01365562, 0.03542553, 0.35438785, -0.05870872, 0.04099204, 0.04559140, 0.06113442, 0.04172319, -0.09740200, -0.07469965, -0.05367360, 0.11097978, 0.04623127, -0.07170702, -0.11307340, -0.05718472, 0.09323559, 0.12360246, -0.00003307, -0.00023111, -0.00002647, 0.0000903, 0.00004585, 0.00005801, 0.07943795, 0.00000248, 0.00151046, -0.00008376, -0.00001347, -0.00041579, 0.00012077, 0.09910898, 0.29380750, -0.00010863, -0.00073032, 0.00016007, 0.00002497, 0.00022195, 0.00006206, 0.03460648, 0.02715054, 0.03805067, -0.00031894, -0.00118463, 0.00031456, 0.00011078, 0.00036908, 0.00009969, -0.01013655, -0.03097379, -0.01556121, 0.39277180, -0.00005457, 0.00099171, -0.00051559, 0.00002919, -0.00026562, 0.00001023, -0.03007631, -0.02416100, -0.02188073, 0.05802027, 0.75790827, -0.00014403, -0.02029084, 0.00054593, 0.00001076, 0.00059354, 0.00017195, -0.01342708, -0.02138343, 0.00132599, 0.31734654, -0.01596434, 0.39867503, 0.00014847, 0.00019307, -0.00018834, -0.00007126, -0.00006527, 0.00003913, 0.00004786, -0.000477

39,-0.00409853,-0.04445936,-0.04299014,-0.02515705,0.05395903,-0.00000  
368,-0.00000501,0.00025811,-0.00000640,0.00000654,-0.00011737,0.000105  
74,0.00312529,0.00007150,-0.04513410,-0.42641827,-0.01198599,0.0493354  
3,0.44747694,-0.00015340,0.00105418,-0.00031753,0.00008625,-0.00027613  
, -0.00008043,-0.00437257,-0.00052321,0.00004005,-0.02886950,-0.0140145  
6,-0.04436376,0.03444828,0.01253267,0.04957576,-0.07167609,0.03250460,  
-0.00872885,0.00466247,0.00666940,-0.00014344,0.00032415,-0.00058920,0  
.00039857,0.00104248,-0.00046401,0.00113072,-0.00028863,0.00010575,-0.  
00043586,0.67410210,0.00566115,-0.15232400,0.03243598,0.00697415,-0.01  
520709,-0.00102345,0.00032404,-0.00151698,0.00047519,0.00132357,-0.001  
03590,0.00180929,-0.00042553,0.00010919,-0.00099214,-0.01059192,0.4101  
9479,-0.00002382,0.04495382,-0.04851891,0.00150931,-0.00752304,0.00652  
516,-0.00031037,0.00124814,-0.00040886,-0.00082481,0.00063651,-0.00117  
859,0.00028847,-0.00014346,0.00062174,0.05358291,-0.19716728,0.1958970  
1,-0.00021582,0.00179133,-0.00198896,0.00003032,-0.00060906,0.00009617  
, -0.00003618,0.00007934,-0.00003177,-0.00010372,0.00004409,-0.00011228  
, 0.00005877,-0.00003403,0.00006098,-0.38803850,0.07176055,-0.10075095,  
0.40932222,0.02439251,-0.00748929,0.00984791,-0.00080653,-0.00194399,-  
0.00103762,0.00006503,-0.00003067,0.00002560,0.00016552,0.00007045,-0.  
00005735,-0.00008084,0.00006657,0.00009454,0.07373308,-0.06443135,0.04  
454834,-0.07251361,0.07105201,-0.00683083,-0.00388172,-0.00159249,0.00  
027497,-0.00131244,-0.00053164,-0.00004660,-0.00024303,-0.00001040,-0.  
00013896,-0.00003293,0.00001144,0.00008501,0.00009361,-0.00012209,-0.1  
2122114,0.05090747,-0.05221640,0.10599537,-0.04806845,0.05463113,0.000  
53127,-0.00103219,-0.00001187,-0.00007383,0.00029824,0.00015008,0.0097  
7115,-0.00887085,0.00155197,-0.02062943,0.02014933,-0.03158655,-0.0023  
0311,0.00273642,-0.00074846,-0.00376652,0.00627429,-0.00526438,-0.0005  
6271,0.00003026,-0.00016868,0.65955719,0.00014518,0.00057805,0.0010597  
2,-0.00033298,0.00016571,0.00004332,-0.00290465,-0.03421534,0.01006168  
, 0.00699014,0.00903469,0.00404809,-0.00126840,0.00091313,-0.00147560,0  
.00094068,0.00153830,0.00148393,-0.00007010,-0.00093075,-0.00022665,0.  
03863434,0.45878744,0.00004445,0.00163253,-0.00022528,0.00017914,0.000  
07721,0.00003664,0.00069842,0.00383536,0.00795730,-0.02818585,0.019510  
23,-0.02323565,0.00130411,0.00186732,-0.00233585,-0.00290842,0.0021813  
1,0.00468679,0.00042185,-0.00024099,-0.00045502,0.03960983,-0.20435733  
, 0.31286945,-0.00314734,0.00191150,0.00169946,0.00039653,-0.00052597,-  
0.00040203,-0.00011068,0.00435577,-0.00049817,-0.00422325,0.00086442,-  
0.00186415,0.00203964,-0.00010183,-0.00106278,0.00768570,-0.02969693,0  
.02000759,0.00269845,-0.00299673,0.00191305,-0.20418115,-0.10371132,0.  
06217115,0.71405136,-0.00229754,0.00703146,-0.00052651,0.00089391,-0.0  
0096958,-0.00062347,0.00171787,0.00084641,0.00082823,-0.00416003,-0.00  
163080,-0.00077191,0.00027381,-0.00046596,0.00003250,-0.00217801,-0.03  
237652,0.02996701,0.00270660,0.00050655,-0.00107868,-0.06116081,-0.169  
73837,0.07692494,0.00771240,0.47861143,0.00147245,-0.00690062,0.001826  
71,-0.00063076,0.00116552,0.00071417,-0.00027679,0.00068499,0.00126065  
, 0.00163756,0.00326630,-0.00281783,0.00012633,0.00044239,-0.00017769,0  
.00383332,0.03120603,-0.01549288,-0.00132197,-0.00060820,0.00009694,0.  
03551955,0.07916279,-0.11268248,0.01506269,-0.25517695,0.30498356,0.00  
008794,0.00020319,0.00000193,0.00008902,-0.00004321,0.00000089,0.00019  
764,-0.00024085,0.00019871,0.00163303,0.00077631,-0.00075685,-0.000355  
23,0.00013138,0.00104298,0.00209497,-0.00117493,0.00078685,0.00048372,  
0.00116380,-0.00076978,-0.01714196,0.00404269,-0.00317980,-0.31745773,  
0.03898206,-0.03148666,0.34018767,0.00013441,-0.00065665,-0.00007619,-  
0.00007510,0.00001752,-0.00005477,-0.00005364,-0.00044198,0.00010648,0  
.00043683,0.00028289,0.00015600,-0.00032374,0.00029443,0.00035790,0.00  
128323,0.00046693,-0.00227525,-0.00096532,-0.00048606,0.00063409,-0.01  
927533,0.00487389,-0.00248758,0.04053232,-0.05471090,0.01712836,-0.041  
63620,0.05297501,-0.00016604,-0.00006807,-0.00010803,0.00014297,-0.000  
23471,-0.00013207,-0.00037764,-0.00110448,0.00005848,-0.00016561,0.000  
56898,-0.00062243,0.00073575,0.00078391,-0.00214888,-0.00102014,-0.002  
74525,-0.00149226,0.00027098,0.00090029,0.00016938,0.01123348,-0.00415  
924,0.00493915,-0.02915729,0.01748978,-0.04381363,0.03411857,-0.023238  
11,0.04039863,0.01175600,-0.02830979,0.00524669,-0.00287239,0.00541722  
, 0.00174331,0.00000310,0.00173092,-0.00122368,-0.00111385,0.00100363,-

0.00229887,-0.00045539,0.00028503,0.00054393,-0.18158684,-0.03708650,0.02859285,-0.02434486,-0.01906421,0.01969501,0.05936509,0.00501416,0.00306870,-0.14648364,0.01980998,-0.02154506,-0.00954002,0.02323684,-0.01708589,0.67774593,-0.01122892,-0.03561382,0.01763196,-0.00190901,0.00476358,0.00042982,0.00043684,0.00010879,-0.00022683,-0.00022791,0.00071737,-0.00149399,0.00072500,-0.00047579,0.00174795,-0.06399892,-0.13222419,0.05870404,0.00343048,0.00684637,-0.00418421,-0.03730551,-0.03641861,0.02507675,0.07799913,-0.20424879,0.10234795,-0.00176520,0.00056517,0.00305489,-0.00630925,0.48745961,0.00020531,0.01311884,-0.01054566,0.00166733,-0.00330712,-0.00073680,0.00005106,0.00131846,-0.00076192,0.00010889,-0.00107610,0.00161796,-0.00050097,0.00017485,-0.00061153,0.05654223,0.07296518,-0.08709860,-0.00683517,-0.00859356,0.00293288,0.02822725,0.02799643,-0.01497248,-0.05897877,0.09870401,-0.13855170,0.00101772,0.00276421,0.00130834,0.01852057,-0.23445768,0.32122357,0.00035578,0.00701044,-0.00224114,-0.00002401,-0.00158401,-0.00067922,0.00079686,-0.00113494,0.00078937,0.00026662,0.00011524,-0.00021855,0.00046986,0.00016942,0.00027836,-0.03867955,-0.00804538,0.00397454,0.00034294,-0.00292298,0.00148001,-0.05693875,-0.01752932,0.00640290,-0.00584040,0.06095423,-0.04277960,0.00151884,0.00079899,-0.00083155,-0.29271056,0.00745074,-0.01127444,0.66019421,-0.00367479,0.00220793,-0.00179900,0.00022524,-0.00043526,0.00048951,0.00035677,-0.00069300,0.00059314,-0.00042943,-0.00005499,0.00027534,0.00017575,-0.00016167,-0.00002104,-0.02983494,0.00654552,-0.00259745,-0.00340899,-0.00248115,0.00302771,-0.01781440,-0.00610691,-0.00055645,0.02709463,0.01244795,-0.00163986,0.00172050,-0.00160061,0.00532712,0.06111542,-0.11364853,0.03772942,-0.00329100,0.54212369,0.00255062,-0.00275240,0.00020003,-0.00121796,0.00007269,0.00030559,-0.00048190,0.00069967,-0.00048828,0.00002193,0.00013161,-0.00023878,-0.00001038,0.00012731,-0.00006899,0.02234662,-0.00084832,0.00720124,0.00212537,0.00317753,-0.00051615,0.01015509,0.00035808,-0.00422544,-0.02014963,0.00067705,0.00704969,-0.00139422,0.00503324,0.00141934,-0.05093701,0.03337073,-0.09353578,0.02174023,-0.28901014,0.32932944,-0.00269019,-0.00104978,0.00025406,0.00021940,0.00011052,0.00006225,0.00009427,0.00007410,0.00002060,0.00011121,0.00009771,-0.00008132,-0.00002638,0.00000266,0.00013985,0.00228350,-0.00004782,0.00030668,0.00014318,-0.00000231,-0.00002111,-0.00115546,-0.00062700,0.00025374,-0.00552031,-0.00018056,-0.00008961,-0.00046566,0.00113351,-0.00093176,-0.00520366,0.02470625,-0.01756063,-0.09396283,0.07459762,-0.05376969,0.09558691,-0.00071334,-0.00000636,0.00074487,-0.00036196,-0.00098118,-0.00040795,0.00004377,-0.00011357,-0.00000506,0.00003451,0.00003941,-0.00002794,0.00000063,0.00000199,-0.00004048,0.00018718,-0.00042319,-0.00157597,0.00009046,-0.00023334,-0.00026885,-0.00018589,0.00008333,-0.00050899,0.00016583,0.00271887,0.00195145,-0.00007704,0.00003825,0.00005171,-0.00132205,0.00071017,0.00198658,0.07622280,-0.21652451,0.12907585,-0.07832609,0.22642529,-0.00060158,0.00046418,0.00159614,0.00049825,-0.00012941,-0.00057423,-0.00009399,-0.00014735,0.00000525,-0.00003486,0.00011714,-0.00017364,-0.00001188,-0.00000400,-0.00001096,0.00013204,-0.00138583,-0.00192151,-0.00012150,-0.00021735,-0.00041232,0.000066967,-0.00052571,-0.00015153,-0.00067365,0.00213507,0.00427331,0.00008205,0.00007858,0.00005984,-0.00012080,0.00305354,0.00180560,-0.05353495,0.12884187,-0.12566656,0.05692329,-0.14341594,0.12469791,-0.00109273,-0.00071990,0.00063036,0.00028074,0.00040627,0.00002272,0.00083480,-0.00014074,0.00021702,-0.00003835,0.00155348,-0.00074724,-0.00029442,-0.00009325,0.00047713,-0.00052075,0.00393149,-0.00372708,-0.00089964,-0.00050354,0.00054330,-0.00696825,0.03015158,-0.01982043,-0.00420894,-0.00701990,0.00480513,0.00058098,-0.00016771,0.00053536,-0.04589168,-0.01575845,0.00875558,-0.21392196,-0.11424966,0.07208613,0.01127894,0.00810919,-0.00554510,0.73031983,0.00063932,-0.00160332,0.00038974,-0.00020314,-0.00007459,-0.00011946,-0.00074478,0.00105772,-0.00088590,0.00165557,-0.00049190,0.00115480,-0.00062774,-0.00032836,-0.00001927,0.000827824,0.00129551,0.00367309,0.00098333,0.00138284,0.00045315,0.06604570,0.00988238,0.00434483,-0.01012154,-0.04359722,0.02537550,-0.00006195,-0.00086229,0.00034688,-0.05602949,0.03492496,-0.02683054,-0.06138568,-0.19162224,0.08935722,-0.01705983,-0.01120419,0.00889719,-0.00332438,0.50204112,-0.00019092,0.00132766,-0.00086021,0.00000996,-0.0000718



9, 0.00024783, 0.00099924, 0.00012497, 0.00042999, -0.00005032, -0.00069738, 0.00022216, 0.00026168, 0.00014549, 0.00015722, -0.00527047, 0.00267067, 0.00189795, -0.00054093, 0.00000802, 0.00122986, -0.05040743, -0.00046087, 0.00280093, 0.00712398, 0.02637175, -0.02224202, 0.00018494, 0.00007011, -0.00111592, 0.03626379, -0.02262825, 0.02304470, 0.03497321, 0.08657965, -0.11744482, 0.01215764, 0.01022956, -0.00314984, 0.02580799, -0.24895081, 0.30692918, -0.00017173, 0.00073325, -0.00020605, 0.00009830, -0.00015819, -0.00005015, 0.00003302, 0.00020154, -0.00002748, -0.00013635, 0.00019991, -0.00016435, 0.00000416, 0.00002194, 0.00003517, -0.00103752, -0.00002285, -0.00012967, -0.00015867, -0.00019589, 0.00012689, 0.00140034, 0.00150061, -0.00118864, 0.00066050, -0.00030860, 0.00029180, -0.00008308, 0.00002444, -0.00000276, 0.00006993, -0.00277426, 0.00176171, -0.01578067, 0.00448686, -0.00381093, 0.00085474, 0.00000038, 0.00014278, -0.32560283, 0.03848659, -0.03754610, 0.34513533, -0.00013203, 0.00044445, -0.00000629, 0.00007543, -0.00011320, -0.00006963, -0.00008879, -0.00025671, -0.00001243, 0.00026666, -0.00037445, 0.00030896, -0.00000400, -0.00007746, -0.00002866, -0.00102814, 0.00027956, -0.00021129, -0.00024778, -0.00025550, 0.00005252, 0.00149417, -0.00158638, 0.00555378, -0.00051816, -0.00112564, 0.00016905, 0.00005589, -0.00019675, -0.00037335, -0.00266682, -0.00004423, 0.00493568, -0.02073425, 0.00620005, -0.00264354, 0.00040184, -0.00065839, -0.00236909, 0.03890012, -0.05808366, 0.01525445, -0.04124207, 0.05460896, 0.00008234, -0.00009759, 0.00016959, -0.00002709, -0.00002397, -0.00005622, 0.00015978, -0.00006182, 0.00003849, 0.00000614, 0.00022063, -0.00016646, -0.00002322, -0.00005049, 0.00004164, 0.00050772, -0.00007465, 0.00025364, 0.00015556, 0.00001863, -0.00019714, -0.00069113, 0.00588170, 0.00309374, 0.00012523, -0.00000287, -0.00083657, 0.00000294, -0.00040395, -0.00048710, 0.00152885, 0.00481392, 0.00393598, 0.01326372, -0.00157695, 0.00528356, -0.00005568, -0.00235081, -0.00245307, -0.03765057, 0.001513236, -0.04980117, 0.04052230, -0.02113978, 0.04203842, -0.00038024, 0.00221516, -0.00095425, 0.00030520, -0.00062136, -0.00026212, -0.00353504, -0.00276830, -0.00119499, 0.00395155, -0.00037109, 0.00323715, -0.00103787, -0.00076988, 0.00014708, 0.00062592, -0.00461636, 0.00456848, 0.00060564, 0.00028463, -0.00006417, -0.30465935, 0.03590983, -0.04345421, -0.04518259, -0.04880745, 0.03000447, -0.00018841, -0.00258375, 0.00155837, -0.03896822, 0.02971014, -0.02459701, 0.05787181, 0.00082061, 0.00156213, -0.00226551, -0.00357214, 0.00168521, -0.14933045, 0.02458882, -0.01772738, -0.00581338, 0.02465097, -0.01756402, 0.67592910, -0.00024759, 0.00248079, -0.00096671, 0.00025091, -0.00041280, -0.00010800, 0.00277942, -0.00418679, 0.00272994, -0.00009620, -0.00345410, 0.00189017, 0.00082562, 0.00038944, -0.00010253, -0.00470844, -0.00279826, 0.00082698, 0.00000483, -0.00026004, 0.00002651, -0.00579470, -0.10572119, 0.02415939, -0.01345017, 0.03227446, -0.01528511, -0.00363682, -0.00083116, 0.00415601, 0.03112304, -0.01767714, 0.01108616, -0.03684453, -0.03496187, 0.02762781, -0.00290992, 0.00139209, 0.00389824, 0.07721047, -0.23721912, 0.12128168, -0.00041299, 0.00101608, 0.00227120, 0.05076029, 0.53943001, 0.00013402, -0.00162728, 0.00069837, -0.00007262, 0.00034027, 0.00006943, -0.00099227, -0.00004095, 0.00010446, -0.00025264, 0.00330918, -0.00039405, -0.00034749, 0.00019585, 0.00023469, 0.00322842, 0.00075168, -0.00150465, 0.00001305, 0.00027010, 0.00013347, -0.01097811, 0.02718228, -0.08161235, 0.00623447, -0.01719080, 0.02162243, 0.00218204, 0.00450545, 0.00328562, -0.02336479, 0.01089719, -0.01450844, 0.02932021, 0.03056310, -0.01165821, 0.00174042, 0.00371592, 0.00431806, -0.05630942, 0.11652967, -0.14406694, -0.00006469, 0.00292132, 0.00170264, -0.00206279, -0.27327331, 0.31492123, -0.00007787, 0.00010598, -0.00000205, 0.00002149, -0.00002022, -0.00000065, 0.00113538, 0.00065080, 0.00003662, 0.00037763, 0.00033472, 0.00008409, 0.00001425, -0.00002993, 0.00025689, 0.00025420, -0.00016524, 0.00011083, 0.00004775, 0.00011452, -0.00006909, -0.01625295, -0.02012930, 0.01265290, -0.00454307, 0.00187300, -0.00211880, -0.00090538, -0.00101106, 0.00063979, -0.00050783, 0.00069320, -0.00040217, 0.00012374, 0.00194258, -0.00181791, 0.00037428, 0.00041935, -0.00032377, 0.01104607, 0.00858286, -0.00536284, 0.00070380, -0.00024492, 0.00048684, -0.17867586, -0.12031071, 0.07222718, 0.18700014, 0.00015072, -0.00011031, 0.00007028, -0.00003498, -0.00003009, -0.00003471, 0.00089035, -0.00105947, 0.00060091, -0.00077912, -0.00008410, -0.00089111, -0.00006944, 0.00010335, -0.00008801, 0.00004090, 0.00010253, -0.00049706, -0.00006173, -0.00002121, -0.00002746, 0.00262013, 0.00609749, -0.00208191, 0.00118387, 0.00214626, 0.00225373, 0.00035579, 0.00043782, 0.00018034, 0.00065728, -

0.00041122,-0.00006981,0.00257977,-0.00020230,0.00460681,-0.00077795,-  
0.00043095,0.00041493,-0.01624729,-0.01041442,0.00815035,0.00023026,-0  
.00053429,-0.00222541,-0.12170807,-0.16757395,0.08411051,0.12980112,0.  
17340143,-0.00008813,-0.00012237,0.00003297,0.00004195,-0.00000873,-0.  
00003031,-0.00033340,-0.00010485,-0.00024743,-0.00043712,0.00007906,-0  
.00048940,0.00000407,0.00004198,-0.00009490,0.00012040,-0.00027102,0.  
00035171,-0.00003276,0.00004625,-0.00009662,-0.00380955,-0.00214821,0.  
00435663,-0.00140322,0.00247871,0.00380571,-0.00036411,0.00011692,0.00  
062942,-0.00048697,-0.00019183,-0.00063038,-0.00171680,0.00501697,0.00  
345263,0.00051446,0.00045668,-0.00010960,0.01174353,0.00949573,-0.0028  
7134,0.00003322,-0.00242860,-0.00256734,0.07349927,0.08339046,-0.08745  
616,-0.07701697,-0.09371680,0.08409049,-0.07022764,0.00253154,-0.03814  
427,0.00476683,0.00424491,0.00687802,0.00000124,-0.00003207,0.00000460  
,0.00004084,-0.00000734,0.00001573,-0.00002699,0.00001100,0.00001788,0  
.00165105,0.00200484,-0.00406552,0.00017272,-0.00046698,-0.00045808,-0  
.00000818,-0.00001720,0.00012510,0.00020299,0.00017520,-0.00005986,0.0  
0003455,-0.00003867,0.00000799,-0.00059381,-0.00025259,-0.00024303,-0.  
00050263,0.00049092,0.00017648,0.00021804,-0.00031058,0.00064311,0.000  
25075,-0.00017249,-0.00008845,0.00002132,0.00002056,0.00000557,0.00000  
907,-0.00004751,-0.00002086,0.00001002,-0.00000918,0.00004176,0.267739  
55,-0.00509393,-0.05300962,-0.01355889,-0.00160933,-0.00123589,-0.0112  
4956,0.00003281,-0.00020477,0.00010744,0.00017892,-0.00012691,0.000301  
92,-0.00002492,-0.00001077,-0.00014052,0.01428215,-0.00803744,0.014902  
70,-0.00124863,-0.00296679,0.00424489,0.00020773,-0.00015814,-0.000204  
14,-0.00067073,-0.00107499,0.00079459,-0.00007997,0.00020769,-0.000008  
54,0.00357421,0.00205146,-0.00074272,-0.00139455,0.00013544,0.00069082  
, -0.00010820,-0.00032716,0.00058517,0.00024585,-0.00000660,-0.00012028  
, -0.00008142,-0.00002934,0.00002004,-0.00028934,-0.00032263,0.00015042  
, -0.00002095,0.00000995,0.00005455,-0.12130947,0.59412831,-0.04165839,  
-0.00546247,-0.11038510,-0.00359608,-0.00369534,-0.00609352,0.00000708  
,0.00018649,-0.00005934,-0.00009513,0.00009444,-0.00013998,0.00003339,  
-0.00002163,0.00004801,-0.00489187,0.00037585,-0.00092194,0.00059440,0  
.00025761,-0.00081979,0.00002660,0.00011210,-0.00007495,0.00005626,0.0  
0000912,-0.00008030,-0.00000371,-0.00003168,-0.00000249,-0.00026225,0.  
00021043,0.00002501,0.00126261,-0.00026820,-0.00060134,-0.00008156,0.0  
0076655,-0.00050947,-0.00043441,0.00010314,-0.00015790,0.00002536,-0.0  
0003476,-0.00003666,0.00008855,0.00019435,-0.00003243,-0.00001304,0.00  
004790,-0.00001980,0.15144580,0.07103297,0.41882843,-0.00821646,0.0064  
1578,-0.01018565,-0.00003739,0.00047903,-0.00045449,0.00000101,-0.0000  
1115,0.00000500,0.00001859,-0.00000375,0.00001235,-0.00000707,-0.00000  
374,0.00000659,0.00039820,0.00124657,-0.00077410,0.00025356,0.00002818  
, -0.00026692,-0.00005757,-0.00002033,0.00007604,0.00014939,0.00011051,  
-0.00022590,0.00002106,-0.00003631,0.00001154,-0.00064556,-0.00013118,  
0.00006522,-0.00046122,0.00014161,-0.00004085,0.00023649,-0.00030981,0  
.00005698,0.00015822,-0.00011726,0.00017309,0.00000035,0.00002992,0.00  
000985,-0.00000210,-0.00003865,-0.00002562,0.00001179,-0.00002864,0.00  
000329,-0.12097326,0.07884904,-0.05587163,0.29832003,0.00308100,0.0069  
4825,0.01188494,0.00106374,-0.00184644,-0.00108901,0.00000425,0.000126  
61,-0.00002484,-0.00002874,0.00006038,-0.00007069,0.00001073,-0.000010  
50,0.00003976,-0.00166729,0.00150753,-0.00232168,0.00006834,0.00052425  
, -0.00052716,0.00004194,0.00009135,-0.00002014,0.00009768,0.00016483,-  
0.00010358,0.00000501,-0.00003775,-0.00001449,-0.00065999,-0.00038430,  
0.00004145,0.00055458,0.00000261,-0.00019179,-0.00022265,-0.00001967,0  
.00010263,-0.00019732,-0.00004738,-0.00004540,0.00003493,-0.00000418,-  
0.00001984,0.00004193,0.00017852,-0.00007372,-0.00000262,0.00001911,-0  
.00001437,0.09929510,-0.24544407,0.05826492,-0.11898220,0.65322113,-0.  
01059897,0.01383388,-0.01121957,-0.00149342,-0.00009042,-0.00220931,0.  
00000370,0.00009468,-0.00002110,-0.00002909,0.00005432,-0.00007462,0.0  
0000790,-0.00001756,0.00004905,-0.00328881,0.00309707,-0.00345335,0.00  
039284,0.00093524,-0.00122014,-0.00017492,-0.00000977,0.00008788,0.000  
26925,0.00050057,-0.00027386,0.00004187,-0.00007670,-0.00000466,-0.001  
61384,-0.00098953,0.00040047,-0.00002909,0.00006264,0.00021751,0.00018  
763,-0.00008456,-0.00012064,0.00008685,0.00002057,0.00009949,0.0000253  
6,0.00001990,-0.00000006,0.00015284,-0.00000115,-0.00002243,0.00001626

, -0.00002366, -0.00001591, -0.04201898, 0.02035318, -0.12049044, 0.20373377  
, 0.11721781, 0.56730987, -0.00231520, 0.00131792, 0.00099551, -0.00034245, -  
0.00018832, 0.00015362, -0.00000545, -0.00001334, -0.00000244, -0.00001180,  
-0.00000541, -0.00000617, 0.00000221, 0.00000515, -0.00000365, 0.00028828, -  
0.00036610, 0.00010061, -0.00000235, -0.00006623, 0.00005809, 0.00001845, 0.  
00000916, -0.00000724, -0.00003979, -0.00005082, 0.00002016, -0.00000732, 0.  
00001294, -0.00000147, 0.00017004, 0.00013405, -0.00007280, -0.00004362, -0.  
00002828, 0.00001414, 0.00003339, -0.00002428, 0.00005748, 0.00000762, -0.00  
001091, -0.00001730, -0.00001147, -0.00000975, 0.00000571, -0.00002563, -0.0  
0000519, 0.00000659, -0.00000066, 0.00000170, 0.00000323, 0.00306375, 0.0117  
3267, 0.00922278, -0.04537368, 0.00442332, -0.00836017, 0.03793800, -0.00032  
621, -0.00206400, -0.00144239, -0.00088230, 0.00086683, -0.00101253, 0.00000  
122, 0.00002199, -0.00000273, -0.00000546, 0.00001040, -0.00000908, 0.000004  
29, -0.00000583, 0.00000386, 0.00019059, 0.00028743, 0.00030738, 0.00001528,  
-0.00003090, -0.00000493, 0.00000116, 0.00000793, -0.00000496, -0.00000831,  
-0.00000322, 0.00000531, -0.00000298, 0.00000119, -0.00000789, -0.00000956,  
-0.00001469, -0.00003923, 0.00001377, -0.00001190, 0.00004377, 0.00001906, -  
0.00006488, -0.00000166, -0.00001251, 0.00000712, 0.00000596, -0.00000327, -  
0.00000861, -0.00000170, 0.00000021, 0.00000737, -0.00000561, -0.00000018, 0.  
.00000032, -0.00000176, -0.00068330, -0.01721862, -0.01338695, 0.00402633, -  
0.25119569, -0.13092819, -0.00775725, 0.26485788, -0.00087592, 0.00290325, 0.  
.00015686, -0.00015942, -0.00067306, -0.00126392, -0.00000193, -0.00003881,  
0.00000831, 0.00001222, -0.00001969, 0.00002341, -0.00000538, 0.00000839, -0.  
.00001217, 0.00015760, -0.00073228, -0.00009161, 0.00001527, -0.00007498, 0.  
00000327, 0.00001146, -0.00000141, 0.00000707, -0.00002918, -0.00004531, 0.0  
0004065, -0.00000426, 0.00000243, -0.00000229, 0.00021796, 0.00015442, -0.00  
005920, -0.00003295, -0.00002929, 0.00000339, -0.00002913, -0.00001603, 0.00  
000937, 0.00001512, 0.00000345, -0.00001333, -0.00000743, -0.00000084, 0.000  
00625, -0.00001990, -0.00001962, 0.00001392, -0.00000132, -0.00000057, 0.000  
00108, 0.00177891, 0.00796626, 0.00941012, -0.00885496, -0.13189763, -0.1385  
8688, 0.01404492, 0.14231864, 0.14185643, 0.00386649, 0.00428876, -0.0002478  
6, 0.00040898, -0.00073683, 0.00012245, 0.00000148, 0.00002008, -0.00000489,  
-0.00000348, 0.00000878, -0.00001009, 0.00000194, -0.00000012, 0.00000700, -  
0.00106869, 0.00021504, -0.00073608, 0.00009272, 0.00023811, -0.00028356, -0.  
.00000016, 0.00001459, 0.00000549, 0.00006246, 0.00006462, -0.00001539, 0.00  
000545, -0.00001357, -0.00000101, -0.00027355, -0.00026617, 0.00017946, 0.00  
022945, -0.00001421, -0.00017777, -0.00011403, 0.00021026, -0.00009959, -0.0  
0006608, -0.00000982, 0.00001077, 0.00002186, 0.00000790, -0.00002022, 0.000  
02334, 0.00005262, -0.00001125, -0.00000066, 0.00000260, -0.00000687, -0.012  
35487, 0.03036688, -0.01921174, -0.13393190, -0.00336961, -0.12325036, 0.004  
20500, 0.00104798, 0.00030919, 0.31662030, 0.00338128, -0.00280146, 0.000288  
85, -0.00056440, 0.00088149, -0.00049100, 0.00000292, 0.00001857, 0.00000125  
, 0.00000017, 0.00000619, 0.00000185, 0.00000331, -0.00000497, -0.00000313, 0.  
.00056678, -0.00058206, 0.00131486, -0.00006786, -0.00022555, 0.00023857, 0.  
00004058, 0.00001307, -0.00004426, -0.00007866, -0.00009611, 0.00009657, -0.  
00001521, 0.00001551, -0.00000468, 0.00032227, 0.00014149, -0.00006135, 0.00  
018690, -0.00008523, 0.00001942, -0.00007313, 0.00011494, -0.00004340, -0.00  
007034, 0.00004058, -0.00006364, -0.00000480, -0.00001413, -0.00000101, -0.0  
0000853, 0.00002936, 0.00000292, -0.00000594, 0.00001238, -0.00000100, 0.007  
15674, 0.03103170, 0.02439396, 0.02890696, -0.12303980, 0.01496483, -0.01345  
339, 0.00454827, -0.02289765, -0.15723763, 0.66764989, -0.00147119, 0.002462  
57, 0.00368061, 0.00042395, 0.00034148, 0.00053721, -0.00000135, 0.00002758,  
-0.00000377, -0.00000650, 0.00001136, -0.00001080, 0.00000388, -0.00000084,  
0.00000440, 0.00011852, -0.00011753, 0.00014965, -0.00001700, -0.00008883, -  
0.00002331, 0.00006645, 0.00003131, -0.00002114, -0.00001752, -0.00003117, 0.  
.00003762, -0.00000522, -0.00000227, -0.00000344, 0.00000659, -0.00014262, 0.  
.00010129, 0.00030187, 0.00005581, -0.00021852, -0.00010641, 0.00021255, -0.  
00003727, -0.00006888, -0.00005785, -0.00006060, 0.00001241, -0.00000833, -0.  
.00001744, -0.00002023, 0.00009067, -0.00001639, -0.00000341, 0.00001045, 0.  
00000345, -0.03311712, 0.06404692, -0.00780247, -0.10303603, -0.04041545, -0.  
.26963076, -0.00896386, 0.00178055, -0.00936286, 0.21904802, 0.05163666, 0.5  
4663839, 0.00041754, 0.00057439, 0.00030616, 0.00003789, -0.00013205, -0.000  
08889, -0.00000203, 0.00001603, -0.00000778, -0.00001696, 0.00001006, -0.000  
02339, 0.00000368, -0.00000151, 0.00000769, -0.00036137, 0.00011933, -0.0002

3735, 0.00002093, 0.00007373, -0.00009664, -0.00001043, 0.00000487, -0.00000  
135, 0.00000336, 0.00003664, -0.00001357, 0.00000064, -0.00000370, 0.0000014  
2, -0.00009149, -0.00008186, 0.00006693, 0.00004444, -0.00001833, 0.00002130  
, -0.00000449, -0.00000600, -0.00000706, -0.00000600, 0.00000905, -0.0000041  
2, -0.00000041, -0.00000219, 0.00000242, 0.00001269, 0.00000750, -0.00000104  
, 0.00000125, -0.00000004, -0.00000198, 0.00397681, 0.00068024, -0.00502029,  
-0.00377730, 0.01341788, -0.00425712, -0.00258292, -0.00142184, 0.00191450,  
-0.10671713, 0.11351642, -0.05065088, 0.10343048, -0.00019764, 0.00009586, -  
0.00052673, 0.00003158, 0.00002670, 0.00012837, -0.00000138, -0.00001424, 0.  
00000784, 0.00000813, -0.00000803, 0.00001488, -0.00000081, 0.00000172, -0.0  
0000673, -0.00009084, -0.00003499, 0.00003869, -0.00001682, 0.00000339, -0.0  
0001068, 0.00000079, -0.00000337, 0.00000065, -0.00001225, -0.00000439, 0.00  
001423, -0.00000070, 0.00000125, -0.00000283, 0.00007475, 0.00004423, -0.000  
03404, -0.00002818, -0.00000556, 0.00001927, 0.00002396, -0.00000758, -0.000  
01188, 0.00002614, 0.00001018, -0.00000182, -0.00000474, -0.00000460, 0.0000  
0088, -0.00000777, -0.00001201, 0.00000736, 0.00000056, -0.00000198, 0.00000  
058, 0.00110230, 0.00215478, -0.00117900, -0.00151931, 0.00435189, -0.001976  
93, -0.00103499, 0.00024002, 0.00089567, 0.11331574, -0.24318392, 0.06981485  
, -0.12398096, 0.25549051, -0.00006863, 0.00086681, 0.00097853, 0.00006853, -  
0.00022955, -0.00024943, 0.00000180, 0.00001926, -0.00000487, -0.00000247, 0.  
.00000971, -0.00001151, 0.00000024, -0.00000238, 0.00000861, -0.00017699, 0.  
00034853, -0.00040508, 0.00004078, 0.00007344, -0.00010484, -0.00000576, 0.0  
0000623, 0.00000791, 0.00003909, 0.00004525, -0.00003929, 0.00000420, -0.000  
01008, 0.00000087, -0.00021503, -0.00012181, 0.00006552, 0.00006107, 0.00002  
098, -0.00002945, -0.00002902, 0.00000120, -0.00000025, -0.00002475, -0.0000  
1094, 0.00000976, 0.00001014, 0.00000656, -0.00000394, 0.00001816, 0.0000232  
8, -0.00001601, 0.00000030, 0.00000075, -0.00000218, -0.00522580, -0.0013877  
7, -0.00278102, -0.01314044, 0.02339559, -0.00472827, 0.00217720, 0.00055097  
, -0.00005651, -0.05064464, 0.06969287, -0.08261223, 0.05841930, -0.07380087  
, 0.08175191, -0.00031390, 0.00071575, 0.00098403, -0.00001355, 0.00013030, -  
0.00001882, 0.00000520, 0.00002200, 0.00000389, 0.00001310, 0.00000884, 0.00  
000725, 0.00000007, -0.00000235, 0.00000358, 0.00005638, -0.00000423, -0.000  
24670, 0.00002373, -0.00003831, -0.00003977, 0.00000920, 0.00000245, -0.0000  
0563, 0.00001573, 0.00002572, 0.00000236, 0.00000026, -0.00000590, -0.000000  
61, -0.00019403, -0.00013670, 0.00016869, 0.00018829, -0.00002262, -0.000034  
58, -0.00010720, 0.00006279, -0.00007021, -0.00007014, 0.00000511, -0.000028  
14, 0.00002439, 0.00000131, -0.00002545, 0.00003117, 0.00005226, -0.00001160  
, -0.00000361, 0.00000601, -0.00000448, -0.01030321, 0.01467577, 0.00515201,  
0.01509248, -0.02106227, -0.00013141, 0.00364852, 0.00195380, -0.00528750, -  
0.08520714, -0.00401609, -0.03843653, 0.00381217, 0.01321528, 0.00884118, 0.  
32110659, 0.00071795, -0.00314855, -0.00017076, -0.00049331, -0.00016662, -0.  
.00051573, 0.00000411, -0.00000428, 0.00000281, 0.00001104, 0.00000025, 0.00  
000824, -0.00000196, -0.00000251, 0.00000135, 0.00027474, 0.00021640, -0.000  
11671, 0.00001240, -0.00000183, 0.00008406, -0.00007629, -0.00004128, 0.0000  
2857, 0.00003060, 0.00006308, -0.00006610, 0.00000724, -0.00000092, 0.000004  
95, -0.00010497, -0.00003490, -0.00000798, -0.00029471, 0.00006989, 0.000137  
13, 0.00005689, -0.00023336, 0.00011631, 0.00006601, 0.00002934, 0.00006710,  
-0.00000475, 0.00001236, 0.00001298, 0.00002807, -0.00007949, 0.00000697, 0.  
00000481, -0.00001090, -0.00000282, 0.01507913, -0.06224434, -0.00758440, -0.  
.04367054, 0.03058505, -0.06241294, 0.00192603, 0.00212273, 0.00002753, 0.02  
819493, -0.26672779, -0.07373122, -0.00194485, -0.01661812, -0.01511891, -0.  
12209238, 0.61602712, 0.00107658, -0.00035860, 0.00080883, -0.00025263, -0.0  
0007333, -0.00038851, 0.00000322, 0.00001767, 0.00000864, 0.00001552, 0.0000  
0795, 0.00001005, 0., -0.00000611, 0.00000426, -0.00001614, 0.00005289, -0.00  
046471, 0.00004872, 0.00003330, -0.00001279, -0.00002179, -0.00001920, 0.000  
01771, 0.00003781, 0.00007995, -0.00003364, 0.00000643, -0.00001326, 0.00000  
091, -0.00032240, -0.00024845, 0.00023034, 0.00008937, 0.00006572, 0.0000378  
9, -0.00006294, -0.00005268, -0.00006892, -0.00000211, 0.00002401, 0.0000086  
5, 0.00001556, 0.00000618, -0.00001209, 0.00004510, 0.00001800, -0.00001921,  
0.00000122, -0.00000262, -0.00000248, 0.00562943, -0.00640027, -0.00329391,  
-0.01415022, -0.02267258, -0.03033245, -0.00542985, -0.00032508, -0.0020545  
9, -0.01919219, -0.12825941, -0.17390047, -0.00031011, 0.01063401, 0.0093967  
7, 0.24238872, 0.07281483, 0.59866384, -0.00063153, -0.00013562, 0.00035837,  
0.00000491, 0.00004955, 0.00001595, -0.00000176, 0.00001682, -0.00000796, -0

.00001544,0.00000959,-0.00002070,0.00000367,-0.00000138,0.00000626,0.00003099,-0.00003222,-0.00006152,0.00000525,-0.00002166,-0.00001047,0.0000125,0.00001114,-0.00000415,-0.00000143,-0.00000323,-0.00000593,-0.00000211,0.00000026,0.00000076,-0.00004379,-0.00002377,0.00004508,0.00002106,-0.00001225,-0.00002249,0.00000111,0.00001986,0.00000295,-0.00000473,-0.00001087,0.00000442,-0.00000191,-0.00000175,0.00000402,-0.00000373,0.00001056,-0.00000276,0.00000100,-0.00000010,-0.00000086,-0.000034623,0.00003095,0.000074979,0.00545716,0.00145945,-0.00214958,-0.00003050,0.00010187,0.00009073,0.00350976,0.00129461,0.00008279,-0.00246569,-0.00130222,0.00173474,-0.11363052,0.00187302,-0.12771587,0.10991501,-0.00013827,-0.00033881,0.00003189,-0.00007175,0.00013021,-0.00001607,-0.00000225,-0.00000934,0.,-0.00000399,-0.00000473,-0.00000097,-0.00000038,0.00000025,-0.00000206,-0.00003340,0.00011622,0.00016975,-0.00000420,-0.00000542,-0.00002554,0.00000155,0.00000138,-0.00000099,-0.00000250,-0.00000682,0.00000291,-0.00000083,0.00000037,-0.00000170,0.000005139,0.00005445,-0.00005764,-0.00001523,-0.00000576,0.00000815,0.00001285,-0.00001019,-0.00000469,0.00001037,0.00000551,-0.00000170,-0.00000444,0.00000078,0.00000422,-0.00000523,-0.00000842,0.00000223,0.00000019,-0.00000043,0.00000171,0.00015503,-0.00121711,-0.00000836,0.00167429,-0.00365413,-0.00372454,-0.00065969,0.00011525,-0.00102166,-0.01391219,0.00426983,-0.02354882,-0.00090821,0.00051580,0.00110493,0.00191997,-0.05810933,-0.00821343,-0.00441485,0.05581751,0.00057816,0.00009100,0.0002050,-0.00005491,-0.00002707,-0.00017166,0.00000403,0.00002730,-0.00000750,-0.00000448,0.00001451,-0.00001501,0.00000177,-0.00000330,0.00000951,-0.00001746,0.00009873,-0.00021110,0.00001736,0.00003352,-0.00000132,-0.00000559,0.00000186,-0.00000062,0.00001458,0.00002628,-0.00002136,0.00000230,-0.00000349,0.00000352,-0.00014094,-0.00010859,0.00009021,0.00005173,0.00000428,-0.00000213,-0.00002980,-0.00000579,0.00000839,-0.00003773,-0.00000665,0.00000426,0.00000912,0.00000101,-0.00000689,0.00001790,0.00002079,-0.00001024,-0.00000062,0.00000221,-0.00000352,0.00062099,-0.00001380,0.00035689,-0.00191981,-0.00420591,0.00141883,-0.00038195,0.00021320,-0.00054483,-0.00898935,0.00203841,-0.01023101,0.00196025,0.00046276,-0.00029875,-0.12760453,-0.00811129,-0.26219631,0.14145569,0.01011407,0.27446247,0.00538650,0.00003881,-0.00011501,-0.00071547,-0.00058391,-0.00073213,0.00000734,-0.00000868,0.00000818,0.00002619,0.00000055,0.00001820,-0.00000681,-0.00000604,0.00000585,0.00001454,0.00017976,-0.00093325,0.00004603,0.00019410,0.00015506,-0.00009071,-0.00008990,0.00005718,0.00005137,0.00016751,-0.00013184,0.00002191,-0.00001322,0.00001657,-0.00049948,-0.00042540,0.00031060,-0.00019098,0.00026488,0.00024673,0.00007367,-0.00040819,0.00001485,0.00007390,0.00006162,0.00004118,0.00001610,0.00001386,-0.00000803,0.00008785,-0.000005098,-0.00001600,0.00000539,-0.00001093,-0.00000034,0.01495520,-0.04072116,-0.01702229,-0.02636404,0.01656602,-0.02395237,-0.00094457,-0.00000519,-0.00012986,0.01840715,0.02839032,0.03438233,0.00541972,0.00055626,-0.00265322,-0.12936020,0.07658771,-0.06699519,-0.00305781,0.01322938,-0.00423141,0.29720667,0.00129395,-0.00362443,-0.00344772,-0.00018031,-0.00010815,-0.00122997,-0.00000123,-0.00008848,0.00003241,0.00004391,-0.00005172,0.00008070,-0.00001225,0.00000128,-0.00003626,-0.00027758,0.00103185,0.00179985,-0.00005293,0.00006539,-0.00013599,0.00003282,-0.00001434,-0.00000122,0.00000227,-0.00005452,0.00006578,0.00000347,-0.00000385,-0.00001667,0.00047917,0.00042728,-0.00049385,-0.00003652,-0.00004866,0.00002047,0.00001838,0.00000698,-0.00015130,0.00005702,0.00007493,-0.00003001,-0.00000885,-0.00000490,-0.00001518,-0.00002538,-0.00005269,0.00002692,-0.00000406,-0.00000127,0.00000955,-0.01879422,0.02531529,-0.02048178,0.01532853,-0.01539423,0.02194653,0.00002782,0.00023199,0.00077244,0.00593083,-0.05274555,-0.02627254,0.00094803,-0.00218308,-0.00407425,0.10931519,-0.26164891,0.07264808,-0.00197172,0.00514355,-0.00241767,-0.11961663,0.67569979,0.00029539,-0.00401577,0.00306905,-0.00022411,-0.00006713,-0.00067029,-0.00000435,-0.00005130,0.00000025,-0.00000182,-0.00002118,0.00000670,-0.00000634,-0.00000028,-0.00000531,0.00013165,0.00036723,0.00025010,-0.00000888,-0.00002437,-0.00003382,-0.00006834,-0.00007056,0.00004006,0.00004509,0.00008903,-0.00008907,0.00001423,-0.00000450,0.00001175,-0.00010385,-0.00006220,-0.00001567,-0.00029176,0.00019237,0.00009780,0.00007892,-0.00036575,0.000

07376,0.00009936,0.00002968,0.00006670,-0.00000909,0.00002051,0.000013  
53,0.00002109,-0.00009023,0.00001065,0.00000583,-0.00001546,0.00000399  
, -0.00197590,-0.06174703,-0.03104488,-0.02384417,0.02341459,-0.0349261  
2,-0.00005531,0.00070154,-0.00057536,0.02056714,0.01234339,0.05101767,  
-0.00244827,-0.00469271,0.00014907,-0.04839892,0.01813765,-0.13620809,  
-0.01297389,0.02334547,-0.00473831,0.21044692,0.10568444,0.55583655,0.  
00059796,-0.00030039,-0.00015175,-0.00014323,-0.00019898,-0.00035409,-  
0.00000577,0.00000899,-0.00000274,-0.00001522,0.00000331,-0.00001328,0.  
.00000466,-0.00000192,0.00000125,-0.00008398,0.00008134,0.00007271,0.0  
0000988,0.00001621,-0.00003028,0.00001149,0.00001605,-0.00000734,-0.00  
000359,-0.00000584,0.00000717,-0.00000565,-0.00000151,-0.00000653,0.00  
003540,0.00001955,-0.00004993,0.00000540,-0.00000382,-0.00001545,-0.00  
000457,0.00001465,0.00001079,0.00000326,-0.00001331,-0.00000012,-0.000  
00969,0.00000205,0.00001172,-0.00001329,0.00000317,-0.00000476,0.00000  
094,-0.00000032,0.00000233,0.00336125,0.00156194,-0.00510088,-0.000876  
61,0.00019270,0.00003133,-0.00073366,-0.00034168,0.00044967,0.00355658  
,0.00385709,-0.00396113,0.00014555,0.00065967,0.00033941,0.00405670,0.  
01299572,0.00875424,-0.00243489,-0.00139783,0.00179950,-0.04380791,-0.  
00258725,-0.01352450,0.03621611,0.00043169,0.00012573,0.00040986,-0.00  
006890,-0.00003767,-0.00007803,0.00000042,0.00001916,-0.00000724,-0.00  
001059,0.00001053,-0.00001657,0.00000282,-0.00000241,0.00000676,-0.000  
03844,0.00007041,-0.00011468,0.00001540,0.00002038,-0.00001477,-0.0000  
0005,0.00000692,-0.00000185,0.00000760,0.00001098,-0.00001201,0.000000  
04,-0.00000194,0.00000158,-0.00007978,-0.00005619,0.00004332,0.0000446  
9,-0.00000432,-0.00000653,-0.00001889,0.00000241,0.00000283,-0.0000222  
4,-0.00000249,0.00000151,0.00000417,-0.00000171,-0.00000303,0.00000727  
,0.00001539,-0.00000742,-0.00000010,0.00000129,-0.00000187,0.00126403,  
0.00229680,-0.00041781,0.00017948,0.00011229,0.00088182,-0.00028737,-0.  
.00011474,0.00008890,0.00423298,-0.00198182,0.00200576,-0.00008066,-0.  
00086501,-0.00082052,-0.00248473,-0.01670058,-0.01558601,-0.00098573,0.  
.00054462,0.00085653,-0.00220813,-0.25541388,-0.12780042,0.00044916,0.  
26857797,0.00041844,-0.00101911,0.00059475,0.00000048,-0.00012359,-0.0  
0040804,0.00000963,0.00003196,0.00001492,0.00003281,0.00001163,0.00002  
646,-0.00000009,-0.00000686,0.00000152,-0.00000554,0.00035213,-0.00014  
947,0.00001571,0.00001645,-0.00005189,-0.00001853,-0.00000533,0.000004  
44,0.00002588,0.00006772,-0.00002330,0.00000349,-0.00001200,-0.0000064  
9,-0.00024239,-0.00017238,0.00012330,0.00007272,0.00000396,0.00005511,  
-0.00003040,-0.00004184,-0.00002518,-0.00001219,0.00002721,0.00000782,  
0.00001661,-0.00000725,-0.00002028,0.00003617,0.00003012,-0.00001059,0.  
00000020,-0.00000132,-0.00000936,-0.00548518,-0.00043907,-0.00233580,  
-0.00015823,0.00085783,-0.00062987,0.00050073,0.00009821,-0.00024841,-  
0.00366025,0.00134444,0.00176615,-0.00012479,0.00053074,0.00033247,0.0  
0008429,0.01019942,0.00922693,0.00202601,0.00022612,-0.00036056,-0.013  
47835,-0.12763998,-0.13266672,0.01821946,0.13864911,0.13555937,-0.0007  
4498,-0.01042145,-0.00729086,0.00052412,-0.00046845,-0.00162589,0.0000  
1448,-0.00000230,0.00004990,0.00009272,-0.00000991,0.00009767,-0.00001  
189,-0.00001674,-0.00001513,-0.00014565,0.00058064,-0.00032661,-0.0000  
0381,-0.00009621,-0.00013578,-0.00002408,-0.00007637,0.00002799,0.0000  
2383,0.00028187,-0.00011403,0.00001857,-0.00004014,-0.00001562,-0.0003  
2534,-0.00030270,0.00010049,-0.00000307,0.00007087,0.00034060,-0.00002  
704,-0.00024158,0.00029496,0.00006529,0.00005231,0.00006101,0.00000085  
, -0.00000365,-0.00001517,0.00005527,0.00000953,-0.00003313,0.00000256,  
-0.00001550,-0.00000836,-0.07681669,0.02073750,-0.01774232,0.01555420,  
0.00674371,0.01887665,0.00311631,0.00427923,-0.00379079,-0.01114245,-0.  
.01131133,-0.01367053,-0.00041430,-0.00061173,0.00009953,-0.01279442,0.  
.02993235,-0.01803412,0.00412537,0.00396533,-0.00302198,-0.13463241,-0.  
.00318625,-0.12272376,0.00282559,0.00097781,-0.00003898,0.31468530,-0.  
00653277,0.00569547,-0.00877720,0.00091289,0.00130246,0.00342328,-0.00  
000839,-0.00005503,-0.00001654,-0.00001426,-0.00001382,-0.00002047,-0.  
00000499,0.00001586,0.00000751,0.00090457,-0.00226056,-0.00176635,0.00  
007126,0.00012927,0.00086405,-0.00004476,-0.00012191,0.00005793,0.0000  
0339,-0.00006173,-0.00013013,0.00001636,0.00003093,0.00006333,-0.00031  
338,-0.00038269,0.00080723,-0.00061989,0.00026874,0.00013606,0.0002217  
7,-0.00007175,0.00010181,0.00013502,-0.00018946,0.00016043,0.00000887,

0.00003570,0.00001363,-0.00002806,-0.00005181,-0.00001881,0.00000990,-  
0.00002256,0.00001269,0.00099393,-0.25022694,-0.11282316,0.02707440,-0.  
.05335290,0.01109054,0.00377663,-0.00185592,0.00173662,-0.01174663,-0.  
01744398,-0.02677443,-0.00062072,0.00007513,-0.00067193,0.00724479,0.0  
3392121,0.02723383,0.00426435,-0.00347929,0.00109898,0.02884877,-0.121  
79750,0.01617807,-0.01410907,0.00304715,-0.02388996,-0.15058194,0.6547  
7546,-0.00492713,-0.01294407,-0.01776906,-0.00012361,-0.00123364,-0.00  
282025,0.00000410,0.00003939,0.00001681,0.00001565,0.00001109,0.000024  
27,0.00000831,-0.00001369,-0.00000854,-0.00035279,-0.00098914,-0.00183  
633,0.00014135,-0.00021976,0.00014778,-0.00003901,0.00001732,-0.000016  
62,-0.00002494,0.00011161,0.00008783,-0.00001084,-0.00002139,-0.000034  
16,-0.00042418,-0.00046671,-0.00000738,0.00032353,-0.00016871,-0.00015  
794,0.00028738,0.00053857,-0.00080329,0.00001819,0.00004704,-0.0001471  
6,-0.00000770,-0.00001301,-0.00001198,0.00005920,-0.00001377,0.0000586  
7,-0.00000320,0.00000426,0.00000758,-0.03096309,-0.07331644,-0.1535603  
6,0.03167268,-0.02538061,0.04903167,-0.00397415,0.00180405,0.00089751,  
-0.01451925,-0.02628457,-0.04838587,0.00014455,-0.00058610,-0.00097478  
, -0.03199667,0.06808892,-0.00691386,-0.00293030,0.00059001,0.00268289,  
-0.10366474,-0.04011852,-0.26497749,-0.00861961,0.00159289,-0.01041320  
,0.22011356,0.03521938,0.53906577,-0.00175390,-0.00082722,0.00016442,0  
.00017075,0.00026876,0.00037625,-0.00001030,0.00002338,-0.00003749,-0.  
00007870,0.00000853,-0.00006937,0.00001550,0.00000748,0.00000223,-0.00  
092092,-0.00039856,0.00025462,-0.00004479,-0.00018868,-0.00032054,0.00  
005671,0.00011406,-0.00006713,-0.00004695,-0.00029968,0.00018645,-0.00  
003520,0.00003331,-0.00001822,0.00073314,0.00042875,-0.00018356,-0.000  
12431,-0.00021649,-0.00013165,0.00000323,0.00023772,0.00000917,-0.0000  
9722,-0.00008769,0.00000366,-0.00001263,0.00000345,0.00001545,-0.00010  
254,-0.00001656,0.00004657,-0.00000370,0.00001103,-0.00000309,0.002797  
13,-0.00079287,0.00151654,0.00522615,0.00076734,-0.00239245,0.00038783  
, -0.00006072,-0.00016414,-0.00065034,-0.00075705,0.00006246,-0.0008211  
6,-0.00024532,0.00047496,0.00416245,0.00075319,-0.00542234,-0.00026347  
,0.00062328,-0.00014783,-0.00270260,0.01337522,-0.00425378,-0.00262458  
, -0.00128774,0.00204310,-0.10094350,0.10862512,-0.04975544,0.09851803,  
0.00085745,-0.00226611,0.00127247,-0.00017710,0.00025497,-0.00007375,-  
0.00000315,-0.00006588,0.00000409,0.00000344,-0.00003105,0.00002383,-0  
.00000741,0.00000689,-0.00001959,-0.00042129,0.00039647,0.00232594,-0.  
00005813,0.00008125,-0.00014748,0.00004776,-0.00001664,-0.00001767,-0.  
00001104,-0.00022807,0.00008057,0.00000909,0.00001521,0.00001765,0.000  
77393,0.00094641,-0.00042461,-0.00015759,-0.00005538,-0.00005039,0.000  
04702,-0.00005940,0.00002608,0.00003285,0.00004195,-0.00000522,-0.0000  
1824,-0.00000759,0.00000694,-0.00006271,-0.00005287,0.00003021,-0.0000  
0125,0.00000166,0.00000746,0.01132356,-0.01797485,0.00872453,0.0003030  
8,-0.00230333,-0.00458583,0.00076987,-0.00075815,0.00059591,-0.0006189  
8,0.00014013,-0.00043846,-0.00019091,-0.00009631,0.00022356,0.00077370  
,0.00199156,-0.00145319,-0.00015896,0.00010222,-0.00017865,-0.00148166  
,0.00494084,-0.00216482,-0.00088186,0.00039063,0.00086717,0.10944885,-  
0.24765823,0.07399139,-0.11951267,0.26201594,0.00129442,-0.00228017,-0  
.00020505,-0.00012857,0.00025966,-0.00014200,0.00000353,-0.00012176,0.  
00003366,0.00005796,-0.00006597,0.00009563,-0.00001847,0.00000937,-0.0  
0004589,-0.00041376,0.00033561,-0.00041083,-0.00013019,0.00011700,0.00  
013457,-0.00009048,-0.00005066,0.00000888,-0.00001812,-0.00000158,0.00  
006521,0.00000266,0.00000755,-0.00001857,0.00094703,0.00044892,-0.0016  
1019,-0.00027705,-0.00012056,0.00025711,-0.00003682,-0.00009096,0.0000  
7244,0.00011763,0.00023486,-0.00011080,-0.00003309,-0.00000918,0.00000  
750,0.00001542,-0.00020292,0.00011395,-0.00000248,0.00000015,0.0000081  
2,0.00827378,-0.01325771,0.00842944,-0.00255347,-0.00434559,-0.0006021  
9,0.00031800,-0.00081195,0.00058466,0.00011965,-0.00042611,-0.00083289  
,0.00047763,0.00022196,-0.00021706,-0.00500497,-0.00190728,-0.00238941  
, -0.00055018,0.00106112,-0.00031929,-0.01227729,0.02291786,-0.00411026  
,0.00213699,0.00037170,-0.00018078,-0.05057970,0.07580474,-0.08376900,  
0.05825561,-0.07841157,0.08509443,-0.12201958,-0.01903998,0.02195288,-  
0.00236026,0.00000424,0.00234499,0.00000748,-0.00000527,0.00001900,0.0  
0004526,0.00000313,0.00003389,-0.00001417,0.00000755,0.00000545,-0.002  
09201,-0.00340172,0.00105269,0.00043799,0.00022664,-0.00010759,0.00007

470,-0.00001598,-0.00002275,0.00004161,0.00003869,0.00012510,-0.000017  
57,0.00000154,-0.00000224,0.00011517,0.00061560,0.00009900,0.00001313,  
0.00011325,-0.00009261,-0.00008604,-0.00001838,-0.00006091,-0.00004187  
,0.00002262,0.00000565,0.00002043,0.00001311,-0.00000500,0.00002310,0.  
00007507,-0.00004604,-0.00000296,-0.00000477,-0.00000627,-0.00752552,-  
0.00265675,-0.00074667,-0.00013078,-0.00106377,0.00042313,-0.00020743,  
-0.00002930,0.00015560,0.00024643,0.00005763,-0.00058133,-0.00000448,0.  
.00004076,-0.00008108,-0.00003215,0.00010831,0.00003170,-0.00009168,-0.  
.00002681,0.00001444,0.00037886,0.00003338,-0.00039060,-0.00003300,-0.  
00003186,-0.00008293,-0.00100312,0.00087057,0.00040485,-0.00006717,-0.  
00013841,-0.00006804,0.47197138,-0.00998944,-0.05268308,-0.00453720,0.  
00947381,0.00046400,-0.00736705,0.00000914,-0.00016981,0.00005990,0.00  
008127,-0.00009954,0.00018413,0.00000549,-0.00000420,-0.00011068,-0.02  
432439,-0.01185779,0.00968006,-0.00130027,0.00124814,-0.00054899,0.000  
36031,-0.00016116,0.00021766,-0.00123901,-0.00080515,0.00046311,0.0000  
4796,0.00003076,-0.00006037,0.00390051,-0.00080760,-0.00051491,-0.0003  
1410,-0.00041544,0.00042450,0.00000500,0.00001826,-0.00019026,-0.00020  
168,0.00021218,-0.00003421,-0.00009702,-0.00007692,0.00001088,-0.00011  
565,-0.00014422,0.00006437,-0.00002312,-0.00000156,-0.00000390,-0.0039  
7226,0.00389936,0.00092951,-0.00015462,-0.00060840,-0.00016396,-0.0001  
3189,0.00009556,-0.00010198,-0.00014665,0.00019491,-0.00045178,0.00000  
513,0.00000752,-0.00008023,-0.00015408,0.00041268,0.00003364,-0.000031  
58,0.00001791,0.00001947,0.00035099,0.00031082,0.00027779,-0.00000234,  
-0.00003166,0.00011569,0.00098520,-0.00077355,-0.00002832,-0.00021602,  
0.00010455,0.00009867,0.08258383,0.43283599,0.01943623,-0.00297474,-0.  
05425235,0.01105267,-0.00241786,-0.00208334,0.00001603,0.00015879,-0.0  
0001718,-0.00002350,0.00008991,-0.00007852,0.00001763,-0.00003999,0.00  
005805,0.00717196,0.00565898,-0.00028636,0.00052037,-0.00127367,-0.000  
03968,-0.00012335,-0.00016150,-0.00012642,0.00018246,0.00030636,-0.000  
19926,0.00000937,-0.00001113,0.00006175,-0.00131785,0.00015813,0.00252  
578,0.00034117,0.00017987,-0.00014875,0.00004328,-0.00008157,-0.000175  
18,0.00007506,-0.00001990,-0.00005212,0.00003490,0.00000091,-0.0000352  
1,0.00014908,0.00009073,0.00000767,0.00001169,-0.00001062,-0.00000272,  
-0.01419799,-0.00275802,0.00456434,-0.00039941,-0.00163324,-0.00058795  
, -0.00051755,0.00004051,-0.00002378,0.00087128,0.00034365,-0.00071794,  
-0.00009179,0.00006296,-0.00019390,-0.00022871,-0.00031755,-0.00025283  
, -0.00018962,-0.00005997,0.00007326,0.00057343,0.00078665,-0.00117331,  
0.00000895,-0.00003026,-0.00017489,-0.00012254,0.00096295,0.00033593,-  
0.00066045,-0.00029030,0.00015944,-0.08060709,0.23051231,0.37602554,-0.  
.01707913,0.00964702,0.01475169,-0.00286917,0.00086905,0.00223608,0.00  
000077,-0.00003681,-0.00000618,0.00000651,-0.00001087,-0.00000826,-0.0  
0001641,0.00000964,0.00000786,0.00035062,-0.00097918,-0.00004612,-0.00  
021095,-0.00042834,0.00029832,0.00003940,-0.00002785,0.00001498,-0.000  
02921,0.00000324,0.00004431,0.00002548,0.00000040,0.00004044,0.0001044  
3,0.00011224,0.00003518,-0.00000971,0.00012705,-0.00004703,0.00004272,  
0.00006443,0.00007292,0.00003727,-0.00006359,-0.00003851,0.00000982,0.  
00001360,0.00000753,-0.00001580,0.00000896,-0.00001245,0.00000202,0.00  
000436,0.00001443,-0.00000009,-0.00067888,-0.00036746,0.00002661,-0.00  
021069,0.00027164,-0.00001097,-0.00004403,0.00007417,-0.00004088,-0.00  
018212,-0.00019901,0.00000712,-0.00000155,0.00000058,-0.00007439,0.000  
23574,-0.00003229,-0.00000064,-0.00000288,-0.00000141,0.00017687,-0.00  
016404,0.00016881,-0.00005867,-0.00002901,-0.00004947,-0.00120820,0.00  
027899,-0.00020497,-0.00019073,-0.00007887,0.00002124,-0.14672310,0.02  
030636,0.05602207,0.62177198,0.00446747,0.00645426,0.00527673,-0.00309  
879,0.00116784,0.00124914,-0.00000546,-0.00007971,0.00001286,0.0000163  
0,-0.00004071,0.00004386,-0.00000752,0.00001626,-0.00002672,-0.0016020  
7,-0.00257017,-0.00000879,-0.00011531,0.00064033,0.00016861,0.00005142  
, -0.00000426,0.00001332,-0.00004707,-0.00012439,0.00009520,-0.00000712  
, 0.00002835,0.00000435,0.00013740,0.00030010,-0.00014750,-0.00011794,-  
0.00014958,-0.00000408,0.00002711,0.00005755,0.00007448,-0.00001786,0.  
00002873,-0.00005296,-0.00001578,-0.00000078,0.00001545,-0.00003961,-0.  
.00002329,0.00001741,-0.00000555,-0.00000005,0.00000475,-0.00051198,-0.  
.00016973,-0.00035779,0.00000112,-0.00017752,0.00000537,0.00005479,-0.  
00012058,0.00013802,0.00001205,-0.00021757,-0.00016109,0.00000523,0.00



000023,-0.00003875,-0.00015854,0.00014230,-0.00012153,0.00000334,-0.00  
003115,0.00001553,0.00021483,-0.00022342,-0.00022884,-0.00008974,-0.00  
003881,-0.00003050,-0.00021750,0.00081953,-0.00027133,0.00003854,-0.00  
049385,0.00019110,0.05198029,-0.15106600,-0.10618249,0.13850220,0.4756  
2003,0.01076698,0.00306729,-0.00312306,-0.00139142,-0.00020333,0.00141  
162,0.00000484,-0.000004167,0.00000422,0.00002556,-0.00001213,0.0000223  
2,-0.00001065,0.00000964,-0.00000554,-0.00019400,-0.00126797,-0.001168  
71,0.00035634,0.00079983,0.00031432,0.00001431,-0.00006418,0.00006225,  
-0.00016449,0.00001373,-0.00002101,0.00001638,0.00000904,0.00001720,0.  
00007562,-0.00058490,0.00024868,0.00006422,0.00002404,-0.00006364,0.00  
000364,-0.00000123,0.00000469,0.00000622,0.00001457,0.00003380,-0.0000  
0044,-0.00000024,-0.00000076,0.00001394,-0.00000235,0.00000232,-0.0000  
0095,-0.00000327,-0.00000010,-0.00066196,-0.00039492,-0.00025295,-0.00  
011324,-0.00023824,0.00008950,0.00006838,-0.00004417,0.00002489,0.0000  
8281,-0.00012645,0.00003606,0.00001514,0.00001045,-0.00002482,-0.00008  
947,0.00008470,-0.00005924,0.00001115,-0.00002186,-0.00000033,0.000272  
12,-0.00020853,0.00004048,-0.00004395,-0.00002121,-0.00003592,-0.00064  
265,0.00087861,-0.00003458,-0.00007676,-0.00042048,0.00003581,0.085005  
46,-0.09307876,-0.18261294,-0.08464232,0.25435447,0.40738337,-0.000035  
32,0.00115289,0.00086039,0.00000025,-0.00013228,-0.00018339,-0.0000091  
1,0.00002791,-0.00000852,-0.00003289,0.00001111,-0.00002626,0.00001340  
, -0.00000413,0.00000446,0.00009519,0.00018060,-0.00020146,0.00013829,-  
0.00001173,-0.00013307,-0.00000346,0.00003383,-0.00001945,0.00006600,0.  
00002412,-0.00000858,-0.00001146,0.00000225,-0.00001380,-0.00026467,-  
0.00002023,0.00006066,0.00004376,-0.00001321,0.00000899,-0.00001592,0.  
00001100,0.00001670,-0.00002879,-0.00002466,-0.00001036,-0.00000133,-0.  
.00000138,0.00000420,-0.00000049,0.00002546,-0.00001292,-0.00000085,0.  
00000201,0.00000003,-0.00036607,0.00007639,0.00039813,-0.00001092,0.00  
006425,-0.00011616,0.00002503,-0.00003109,0.00001347,0.00006690,0.0000  
1812,0.00013059,-0.00000204,-0.00001370,0.00001136,0.00002859,-0.00018  
494,0.00001698,0.00001720,-0.00002644,0.00002610,-0.00012924,-0.000129  
78,-0.00033981,0.00004042,0.00004094,-0.00000806,-0.00054683,0.0000604  
4,-0.00034563,-0.00054584,-0.00044036,0.00013013,0.01070205,0.01180418  
,0.00653773,-0.12050331,-0.10266865,-0.05891609,0.12580709,-0.00069819  
, -0.00149656,0.00026631,0.00028293,0.00008630,-0.00001564,0.00000772,-  
0.00000951,0.00000371,0.00002159,-0.00000621,0.00001798,-0.00000818,0.  
00000104,-0.00000460,-0.00027526,0.00001099,0.00032815,-0.00007701,0.0  
0000201,0.00012417,-0.00001537,-0.00000590,0.00000311,-0.00000201,-0.0  
0004064,0.00000968,0.00000962,-0.00000004,0.00000764,0.00017512,0.0001  
0221,-0.000016198,-0.00007406,0.00003032,0.00001928,0.00000882,-0.00000  
185,-0.00000973,0.00002498,-0.00000930,0.00000493,0.00000125,0.0000003  
9,-0.00000504,-0.00001780,-0.00002775,0.00001506,0.00000099,0.00000209  
,0.00000328,0.00001073,0.00019619,0.00007827,0.00015426,-0.00026842,0.  
00024415,0.00000047,0.00001924,-0.00003196,-0.00007690,-0.00007126,-0.  
00017976,0.00000604,0.00000406,-0.00000385,-0.00000662,0.00019385,0.00  
005981,0.00000763,0.00001074,-0.00001441,0.00005476,-0.00007676,0.0004  
2013,0.00001255,0.00000393,-0.00001735,-0.00039841,0.00006797,-0.00011  
131,-0.00044916,0.00018079,-0.00003923,-0.00743515,-0.00938275,-0.0062  
0436,-0.10222460,-0.19929849,-0.10751327,0.11244263,0.20628052,-0.0011  
7361,-0.00112599,-0.00173846,0.00006485,0.00021677,0.00021299,0.000000  
05,-0.00004263,0.00002121,0.00002460,-0.00002784,0.00005554,-0.0000021  
8,0.00000048,-0.00002686,-0.00053754,0.00056598,0.00101834,0.00015017,  
-0.00021557,-0.00103498,0.00001487,0.00000555,-0.00004573,0.00003548,-  
0.00008951,0.00009301,-0.00001434,0.00001658,-0.00002275,0.00035722,0.  
00076485,-0.00007277,-0.00014710,-0.00009877,0.00007837,-0.00000011,0.  
00000459,0.00001111,0.00001992,0.00003593,-0.00006478,-0.00001389,-0.0  
0000569,0.00000461,-0.00003170,-0.00004910,0.00003122,-0.00000435,0.00  
000303,0.00000357,0.00020245,0.00016868,0.00031667,0.00005952,-0.00004  
150,-0.00008049,-0.00000660,0.00001009,0.00001115,-0.00003171,0.000033  
59,-0.00003443,-0.00002207,-0.00000278,-0.00000425,-0.00001248,0.00002  
307,-0.00007425,-0.00001839,0.00000832,-0.00000514,-0.00011361,0.00010  
294,-0.00010739,-0.00002234,-0.00001766,-0.00001087,0.00000777,-0.0004  
5078,0.00002423,-0.00007693,0.00021901,0.00022350,-0.01106605,-0.01437  
476,-0.00773804,-0.05929223,-0.10807667,-0.11163577,0.06072728,0.12081

005,0.11115333,0.00464001,0.00286488,0.00245072,-0.00093333,-0.0001218  
0,0.00028038,0.00000958,-0.00000400,0.00001354,0.00004410,-0.00000662,  
0.00003586,-0.00001555,0.00000354,-0.00000415,-0.00010457,-0.00005803,  
-0.00049528,-0.00030927,-0.00006084,0.00080881,-0.00002823,-0.00000567  
,0.00004107,-0.00006839,0.00002142,-0.00003358,0.00000909,-0.00002128,  
-0.00000375,0.00021023,-0.00049157,-0.00015419,0.00002611,0.00007134,-  
0.00005901,0.00000846,-0.00000717,0.00002065,0.00004596,-0.00000816,0.  
00003548,0.00000333,0.00000570,-0.00000493,0.00000031,-0.00002346,0.00  
000855,0.00000161,-0.00000013,-0.00000045,0.00053471,-0.00012004,-0.00  
000917,-0.00002357,0.00025197,-0.00020017,0.00005501,-0.00002477,0.000  
03991,0.00000001,0.00004377,0.00010863,-0.00000768,-0.00000229,0.00000  
889,0.00001995,-0.00007922,0.00001894,0.00001386,-0.00000086,-0.000009  
14,-0.00009028,-0.00006647,-0.00002861,0.00001655,0.00001378,0.0000002  
8,-0.00003238,-0.00008174,-0.00017927,0.00005241,0.00003984,-0.0000565  
4,-0.02604313,0.04602961,0.05778599,-0.30766464,-0.07553550,0.03726709  
, -0.00958573,-0.00149218,0.00497835,0.62373140,0.00215212,0.00085546,-  
0.00436114,0.00062735,-0.00025331,0.00006971,-0.00000147,-0.00002479,0.  
.00001471,0.00001471,-0.00001809,0.00003725,0.00000298,0.00000021,-0.0  
0001858,0.00000296,0.00068062,0.00035745,0.00011415,-0.00009574,-0.000  
15399,-0.00001325,0.00000435,-0.00002334,0.00004738,-0.00002262,0.0000  
2142,-0.00000611,0.00000875,-0.00001734,0.00014188,0.00028038,-0.00003  
988,-0.00007224,-0.00002364,0.00002168,-0.00000224,-0.00001456,-0.0000  
0725,0.00002619,0.00001928,-0.00001099,-0.00000421,-0.00000252,-0.0000  
0463,-0.00001246,-0.00003004,0.00001789,-0.00000200,0.00000025,0.00000  
098,0.00002764,-0.00029917,0.00030964,-0.00008308,0.00016559,-0.000247  
62,-0.00000844,0.00001878,-0.00001576,0.00006694,0.00014057,0.00013800  
, -0.00002472,0.00000593,0.00000806,0.00005943,-0.00014389,-0.00001423,  
-0.00002418,0.00000763,-0.00001223,-0.00007988,0.00013534,-0.00004199,  
0.00001461,-0.00000240,-0.00000865,-0.00004274,-0.00033593,0.00002660,  
-0.00000217,0.00022809,-0.00003832,0.01074047,0.03487416,0.01729144,-0.  
.02860098,-0.10848484,-0.02969572,-0.02306843,-0.00072541,0.00587907,0.  
.08366957,0.46569844,0.00241181,-0.00441907,-0.00039328,0.00093528,0.0  
0003302,-0.00068343,0.00000616,-0.00002551,0.00001084,0.00002495,-0.00  
001631,0.00003536,-0.00000481,0.00000154,-0.00001492,-0.00101989,-0.00  
006986,0.00085159,-0.00009023,0.00011403,-0.00008525,-0.00000396,0.000  
00474,0.00001534,-0.00003818,-0.00006573,0.00002749,-0.00000045,0.0000  
0188,-0.00001209,0.00026185,0.00000261,-0.00029970,-0.00007358,-0.0000  
4833,0.00005528,0.00000007,-0.00001632,-0.00003555,0.00000490,0.000029  
72,0.00000887,-0.00000738,-0.00000461,-0.00000170,-0.00001781,-0.00003  
796,0.00001667,-0.00000203,0.00000013,-0.00000133,-0.00024300,0.000422  
00,0.00003029,0.00006498,-0.00015777,0.00019011,0.00000261,0.00002613,  
-0.00005475,-0.00006885,-0.00002620,-0.00010705,0.00001041,0.00000360,  
-0.00000468,0.00000245,0.00014208,0.00002879,0.00000306,0.00001875,-0.  
00001574,-0.00000333,0.00006006,0.00026293,0.00000882,-0.00000638,0.00  
001940,-0.00004785,-0.00016493,0.00016877,0.00013779,0.00022000,-0.000  
09598,0.02643332,0.00139475,0.00047215,0.08115381,-0.00817905,-0.10635  
187,-0.01530150,-0.00374571,0.00748805,-0.13981443,0.26619681,0.437869  
42,0.00062626,0.00075285,0.00063062,-0.00046495,0.00016643,0.00024622,  
-0.00000018,-0.00002693,0.00000229,0.00000607,-0.00001218,0.00000952,-  
0.00000487,0.00000494,-0.00000567,-0.00020615,-0.00029507,0.00000130,-  
0.00001223,0.00006384,0.00002415,0.00000463,-0.00000874,0.00000814,-0.  
00002878,-0.00002785,0.00001482,0.00000292,0.00000497,0.00000447,0.000  
14076,0.00004068,-0.00006304,-0.00003061,-0.00000702,0.00000297,0.0000  
0894,0.00000758,0.00001184,0.00001132,0.00000395,-0.00000757,-0.000002  
77,0.00000064,0.00000206,-0.00000992,-0.00001551,0.00000838,-0.0000004  
9,0.00000069,0.00000245,-0.00005071,-0.00007602,-0.00001177,0.00000901  
, -0.00004475,-0.00001670,0.00000218,-0.00001399,0.00002554,0.00000321,  
-0.00001144,-0.00002688,-0.00000830,0.00000120,-0.00000565,-0.00001537  
,0.00001359,-0.00003283,-0.00001019,-0.00000267,-0.00000182,0.00002032  
, -0.00001011,-0.00002427,-0.00002512,-0.00001484,-0.00001341,-0.000030  
15,0.00008026,-0.00005097,-0.00001659,-0.00001135,0.00003580,-0.004274  
89,-0.00286856,0.00231200,-0.00970926,0.01726569,0.02152916,0.00054950  
,0.00085496,-0.00126326,-0.11605209,0.06493713,0.09469836,0.11905316,-  
0.00041175,0.00037423,-0.00001066,-0.00005886,-0.00003023,0.00015960,0

.00000333,0.00000770,-0.00000377,0.00000168,0.00000607,-0.00000784,-0.00000325,-0.00000060,0.00000571,0.00009350,0.00000924,-0.00003284,-0.00003106,-0.00001578,0.00002978,-0.00000289,-0.00000596,0.00000321,-0.00000506,0.00001071,-0.00001156,0.00000298,-0.00000162,0.00000705,-0.000002685,-0.00001880,0.00002578,0.00000497,0.00000615,-0.00000669,0.00000091,-0.00000064,0.00000069,-0.00000033,0.00000023,0.00000025,0.00000225,0.00000072,0.000000683,0.00000253,-0.00000137,0.00000078,0.00000027,0.00000013,0.000005345,-0.00001771,0.00001913,-0.00000453,0.00001611,-0.00000727,0.00000379,-0.00000039,-0.00000646,0.00000281,-0.00000298,0.00002287,0.00000599,-0.00000271,0.00000039,-0.00000040,-0.00001433,0.00000582,0.00000724,0.00000041,0.00000230,-0.00000657,-0.00000484,-0.00000925,0.00000084,0.00000466,-0.00000277,0.00001715,0.00001350,-0.000002396,0.000001319,0.00000830,-0.00267149,0.00343820,-0.00217590,-0.00447286,0.00672626,0.00530913,0.00123052,-0.00126418,0.00206450,0.006509483,-0.13104979,-0.11528578,-0.06810601,0.13229371,-0.00035577,-0.00057885,0.00029174,0.00012402,0.00006341,-0.00017963,-0.00000722,0.00001697,-0.00000554,-0.00002569,0.00000644,-0.00001838,0.00001073,-0.00000502,0.00000148,0.00013586,0.00021632,-0.00011583,0.00004971,-0.00004283,0.00000588,-0.00000284,0.00001716,-0.00000985,0.00003100,0.00001361,-0.00000706,-0.00000394,-0.00000383,-0.00000792,-0.00011185,-0.00006102,0.00003922,0.00003669,0.00000941,-0.00000389,-0.00001033,-0.00000061,-0.00000403,-0.00001277,-0.00001153,0.00000783,0.00000027,-0.00000030,-0.00000066,0.00000086,0.00001604,-0.00000846,0.00000019,-0.00000052,-0.00000168,0.00003623,0.00006689,-0.00002236,0.00001166,0.00001280,0.00001347,-0.00000581,0.00000467,-0.00000381,-0.00001312,0.00000390,-0.00001045,0.00000012,-0.00000205,0.00000315,0.00000270,0.00001353,0.00000637,0.00000051,0.00000065,0.00000244,0.00000250,-0.00000397,0.00001506,0.00000170,0.00000096,0.00000847,0.00001884,-0.00003556,0.00001011,-0.00000652,-0.00000152,-0.00000730,0.00246848,-0.00186294,0.00426256,0.00176462,-0.00434872,-0.00167350,-0.00086984,0.00230962,-0.00159321,0.09467972,-0.11550168,-0.18435689,-0.10386566,0.12785905,0.18868119,0.00123893,0.00035351,-0.00067384,-0.00038391,-0.00013210,0.00009750,0.00001173,-0.00001735,0.00001102,0.00004195,-0.00000912,0.00003342,-0.00001873,0.00000035,-0.00000548,-0.00037914,-0.00027678,0.00036152,-0.00015557,0.00015633,-0.00005472,0.00000199,-0.00002540,0.00001942,-0.00005399,-0.00002244,0.00001122,0.00000817,-0.00000409,0.00000223,0.000021009,0.00014181,-0.00014896,-0.00007020,-0.00003681,0.00001532,0.00001797,0.00000453,0.00000871,0.00002135,0.00002253,-0.00001471,-0.0000308,-0.00000163,0.00000100,-0.00000309,-0.00003012,0.00001760,0.00000041,-0.00000013,0.00000248,-0.00018767,-0.00010299,0.00013259,-0.00000356,-0.000009198,-0.00004883,-0.00002853,-0.00001554,0.00003056,0.000003898,0.00001701,-0.00002659,-0.00001479,0.00000472,-0.00001093,-0.00000368,-0.00002990,-0.00004646,-0.00001828,-0.00000262,-0.00000038,-0.00000915,0.00005318,-0.00005893,-0.00001386,-0.00000999,-0.00001667,-0.000006330,0.00004832,0.00006808,-0.00000691,0.00004106,0.00002013,-0.00125324,0.00085526,-0.00232231,-0.02554419,-0.02748505,-0.01061294,-0.00422253,-0.00221612,0.00322682,-0.17006937,-0.10828488,-0.05128127,0.01093118,0.01269690,0.00817577,0.68154758,-0.00048460,-0.00205034,-0.00127121,0.00043785,0.00004927,-0.00025026,-0.00000292,-0.00000190,-0.00000459,-0.00001382,0.00000267,-0.00001436,0.00000344,-0.00000112,0.00000291,-0.00052824,-0.00057731,0.00038998,-0.00003656,0.00016277,-0.00029892,0.00003304,-0.00001244,-0.00000445,-0.00003731,-0.00003365,0.00003347,0.00000142,0.00000446,0.00000966,-0.00001616,0.00012446,0.00006957,-0.00002085,-0.00003221,0.00004213,0.00000079,0.00000343,-0.00001166,-0.00002427,0.00000438,-0.00001887,-0.00000372,-0.00000391,0.00000295,-0.00000342,0.00001257,-0.00000396,-0.00000006,-0.00000071,0.00000099,-0.00040078,0.00007491,-0.00001423,0.00001934,-0.00020086,0.00016174,-0.00002177,0.00001537,-0.00000859,-0.00001099,-0.00004906,-0.00011669,-0.00000219,0.00000374,-0.00000950,-0.00004100,0.00010031,-0.00003791,-0.00000671,0.00000042,0.00000268,0.00009041,0.00001619,0.00005853,-0.00001377,-0.00001149,-0.00000011,-0.00011299,0.00005860,0.00011397,-0.00000492,-0.00001191,0.00001564,0.00209696,-0.04022439,-0.02969700,-0.006192959,0.00474784,0.02464337,-0.00158918,0.00412698,-0.00242716,-0.006181969,-0.21394849,-0.10898232,-0.00919804,-0.00827989,-0.00617032,0.

11720855,0.45063318,-0.00129068,-0.00158394,-0.00140611,0.00051868,0.00017793,-0.00022307,0.00000061,0.00001080,-0.00000381,-0.00000614,0.00000785,-0.00001029,0.00000280,-0.00000094,0.00000489,-0.00017135,-0.00031126,0.00022217,0.00007321,0.00012737,-0.00034926,0.00002692,-0.0000141,-0.00001678,0.00000939,-0.00002270,0.00003612,-0.00000372,0.00000745,0.00000572,-0.00009899,0.00019667,0.00009682,-0.00001392,-0.00002002,0.00003391,-0.00000544,0.00000194,-0.00001400,-0.00002626,0.00000247,-0.00001373,-0.00000118,-0.00000397,0.00000153,-0.00000382,0.00001534,-0.00000728,-0.00000047,0.00000025,-0.00000003,-0.00038018,0.00004134,0.00000094,0.00001147,-0.00012400,0.00011030,-0.00002633,0.00002003,-0.00002075,-0.00002129,-0.00004832,-0.00008548,0.00001228,0.00000220,-0.00000640,-0.00003691,0.00008675,-0.00002118,0.00000075,0.00000104,0.00000685,0.00009653,0.00000783,0.00002989,-0.00000705,-0.00000619,0.00000418,-0.00004864,0.00002844,0.00006917,-0.00000938,-0.00005327,0.00002813,-0.00106348,-0.02935584,-0.03415207,-0.04150118,0.00927614,0.03489046,0.00363941,-0.00227955,0.00375928,-0.00894365,-0.08792269,-0.14033520,-0.01189567,-0.01610675,-0.00613457,-0.13312627,0.23005425,0.40509827,0.00008223,0.00026953,-0.00023978,-0.00014767,-0.00003008,0.00003459,0.00000124,-0.00002180,0.00000991,0.00001785,-0.00001257,0.00002626,-0.00000369,0.00000365,-0.00000948,-0.00010495,-0.00009324,0.00009543,0.00001714,0.00000829,-0.00005504,0.00000471,-0.00000538,0.00000042,-0.00000718,-0.00002121,0.00002154,-0.00000118,0.00000484,-0.00000336,0.00011102,0.00010175,-0.00004316,-0.00004039,-0.00001138,0.00000759,0.00000907,-0.00000023,0.00000417,0.00001273,0.00000655,-0.00000739,-0.00000264,-0.00000026,0.00000016,-0.00000946,-0.00001507,0.00000865,-0.00000118,-0.00000014,0.00000125,-0.00005007,-0.00005374,0.00001942,-0.00000888,-0.00000947,-0.00002969,0.00000218,-0.00000510,0.00001105,0.00001549,0.00000493,0.00000734,-0.00000798,0.00000453,-0.00000300,0.00000253,-0.00001564,-0.00001087,-0.00000681,-0.00000086,-0.00000502,-0.00000854,0.00001824,-0.00000886,-0.00000071,-0.00000392,-0.00000518,-0.00001706,0.00000172,0.00000343,0.00000700,0.00002233,-0.00000010,0.000062539,0.00031781,-0.00032162,0.00114118,-0.00349585,-0.00055945,-0.00056149,0.00001080,0.00026913,-0.00993514,-0.00094205,0.00527035,0.00031127,0.00074507,-0.00118123,-0.30704798,-0.05713308,0.06701928,0.32405092,0.00028460,-0.00045252,0.00027892,0.00002883,0.00006506,0.00005143,0.00000487,-0.00000479,0.00000449,0.00001686,-0.00000338,0.00001475,-0.00000565,0.00000086,-0.00000240,-0.00016606,-0.00008346,0.00012179,-0.00001623,0.00001773,-0.00003471,-0.00000124,-0.00000366,0.00000482,-0.00001190,-0.00000855,0.00000813,0.00000131,-0.00000002,-0.00000260,0.00006160,0.00001069,-0.00005315,-0.00001436,-0.00000958,0.00001246,0.00000083,0.00000135,-0.00000155,0.00000445,0.00000762,-0.00000437,-0.00000075,-0.00000065,-0.00000010,-0.00000188,-0.00001146,0.00000535,-0.00000051,0.00000080,0.00000057,0.00000039,0.00006007,-0.00003293,0.00002085,-0.00002534,0.00004857,0.00000166,0.00000558,-0.00000676,-0.00002619,-0.00001362,-0.00003315,0.00000386,0.00000062,-0.00000096,-0.0000282,0.00004157,0.00001013,0.00000178,0.00000368,-0.00000303,0.00001001,-0.00000671,0.00005337,0.00000019,-0.00000170,0.00000283,-0.00002189,-0.00001254,0.00001734,0.00002472,0.00002666,-0.00001632,0.00033650,-0.00090938,-0.00034339,-0.00311773,-0.00040204,-0.00541106,-0.00106842,-0.00015641,0.00033535,-0.02285236,-0.00011245,0.00657012,0.00130714,-0.00101587,0.00203846,-0.05714678,-0.06246461,0.00386749,0.06348990,0.05738271,-0.00022388,0.00020098,-0.00058157,0.00009934,0.00011255,0.00005173,-0.00000543,0.00000239,-0.00000596,-0.00002082,0.00000255,-0.00001887,0.00000609,-0.00000081,0.00000296,0.00012045,0.00014849,-0.00001076,0.00002974,-0.00002319,-0.00003958,0.00000319,0.00000631,-0.00000983,0.00001543,0.00000084,-0.00000200,-0.00000227,0.00000132,0.00000220,-0.00004982,0.00003900,0.00004332,0.00000823,0.00000847,-0.00000122,-0.00000389,-0.00000159,-0.00000310,-0.00000714,-0.00000700,0.00000270,0.00000042,0.00000029,0.00000030,-0.00000101,0.00001066,-0.00000576,0.00000037,-0.00000027,-0.00000046,-0.00003124,-0.00004334,0.00004264,-0.00001156,0.00001459,-0.00003013,-0.00000836,0.00000228,-0.00000152,0.00001765,0.00002132,0.00002087,-0.00000502,-0.00000009,0.00000212,0.00000780,-0.00002859,-0.00000697,-0.00000453,-0.00000048,0.00000123,-0.00000945,0.00002249,-0.00002364,0.00000128,0.00000026,-0.00000005,0.

00001503,-0.00003329,0.00000934,-0.00000846,0.00001491,0.00000322,-0.0  
0036022,-0.00033497,-0.00086184,-0.00022152,-0.00522504,0.00241016,-0.  
00072442,-0.00018455,0.00014714,-0.01461137,-0.00322718,0.00738784,-0.  
00068146,0.00228416,-0.00149422,0.06713058,0.00381276,-0.06497605,-0.0  
7442462,0.00024192,0.05918282,0.00245794,-0.00324031,-0.00166813,0.000  
66342,0.00019530,-0.00022484,0.00000603,-0.00001172,0.00000432,0.00001  
674,-0.00000560,0.00001340,-0.00000904,-0.00000312,-0.00000236,-0.0016  
3941,-0.00134163,0.00089261,-0.00007632,0.00024096,-0.00055009,0.00005  
487,-0.00002511,0.00000766,-0.00010846,-0.00008200,0.00008429,0.000006  
41,-0.00000055,0.00000221,0.00018708,0.00011927,-0.00000222,-0.0000591  
6,-0.00004458,0.00010208,-0.00000916,0.00000175,-0.00001441,-0.0000267  
3,0.00002214,-0.00003409,-0.00000931,-0.00001028,0.00000343,-0.0000150  
0,-0.00000702,0.00000517,-0.00000145,0.00000109,0.00000222,-0.00051967  
,0.00009169,-0.00008044,0.00005091,-0.00020543,0.00014608,-0.00004117,  
0.00003339,-0.00001188,-0.00005107,-0.00004571,-0.00013775,-0.00000064  
,0.00000391,-0.00001153,-0.00005443,0.00014314,-0.00003661,-0.00000251  
,0.00000611,0.00000066,0.00011758,0.00001265,0.00009841,-0.00001789,-0.  
.00001588,0.00000488,-0.00007123,0.00001609,0.00007041,0.00000784,0.00  
000367,0.00002581,-0.02511139,-0.06008846,-0.03875291,-0.04747232,0.01  
252594,0.02932244,-0.00074624,0.00053768,0.00034269,0.06113928,0.02732  
092,0.00131843,-0.00022071,-0.00447877,-0.00076301,-0.16855358,0.01568  
672,0.05982738,-0.00952558,0.01707716,0.02128648,0.62406968,-0.0020284  
9,-0.00109513,-0.00488961,0.00096453,0.00100425,0.00049800,-0.00000127  
,0.00002669,-0.00000860,-0.00002092,0.00001458,-0.00003022,0.00000460,  
-0.00000588,0.00001233,0.00042489,0.00068878,-0.00002188,0.00010551,-0.  
.00022286,-0.00001721,0.00000068,0.00000012,-0.00002124,0.00001669,0.0  
0001719,-0.00000587,-0.00000093,-0.00000387,0.00000564,-0.00008489,-0.  
00001098,0.00026737,0.00005720,0.00007974,-0.00002395,0.00000404,0.000  
00076,-0.00003098,-0.00000741,-0.00002210,0.00002064,0.00000613,0.0000  
0289,-0.00000284,0.00000505,0.00002406,-0.00001639,0.00000147,-0.00000  
012,-0.00000242,-0.00130451,-0.00023429,0.00039744,0.00000884,-0.00017  
748,-0.00012042,-0.00011128,0.00001468,0.00000602,0.00006748,0.0000560  
7,-0.00010376,-0.00001588,0.00000583,-0.00001928,-0.00002685,-0.000002  
62,-0.00001973,-0.00002149,-0.00000289,0.00001034,0.00006926,0.0000772  
9,-0.00006829,0.00000532,-0.00000036,-0.00001206,-0.00001535,0.0000876  
3,0.00000004,-0.00004077,-0.00000689,0.00000650,-0.02725835,0.00351784  
,0.00627609,0.01194017,-0.00589621,-0.00397790,0.00054199,0.00003817,0.  
.00053436,-0.00562826,-0.02609859,-0.02859848,-0.00389545,0.00015532,-  
0.00454635,0.06207041,-0.16466979,-0.11762287,-0.00487991,0.00768389,0.  
.00550286,0.13013628,0.49247899,0.00023803,-0.00410208,0.00200672,0.00  
039105,0.00061514,0.00047705,0.00000789,0.00001098,0.00000412,0.000019  
60,0.00000054,0.00001587,-0.00000738,-0.00000652,-0.00000336,-0.001220  
11,-0.00017114,0.00037297,-0.00012742,-0.00016771,0.00005599,-0.000003  
02,-0.00000690,0.00002692,-0.00010147,-0.00002332,-0.00000016,0.000007  
07,-0.00001041,-0.00001370,0.00032338,-0.00028634,-0.00004993,0.000057  
63,-0.00000627,0.00002741,-0.00001113,0.00001245,-0.00000348,-0.000003  
95,0.00001170,-0.00000380,-0.00000300,-0.00000290,0.00000055,0.0000040  
6,-0.00001856,0.00000760,-0.00000079,0.00000231,-0.00000092,0.00047337  
,0.00056372,-0.00005335,0.00003075,0.00013697,0.00000776,0.00003423,0.  
00000793,-0.00001018,-0.00009492,0.00002172,-0.00003370,0.00000906,-0.  
00000806,0.00000615,0.00001510,0.00007562,0.00008543,0.00001423,0.0000  
0818,-0.00000292,-0.00000385,-0.00006419,0.00013296,0.00001086,0.00000  
983,0.00002468,0.00016186,-0.00020803,-0.00014202,0.00003290,0.0000495  
0,-0.00002862,-0.00897467,0.02147632,0.03253790,0.02858293,-0.00453717  
, -0.02329127,0.00046220,0.00058493,-0.00053472,-0.02845016,-0.04308585  
, -0.01816990,-0.00028320,-0.00427798,0.00321694,0.10177371,-0.09689495  
, -0.19612868,0.00162578,-0.00429732,-0.00044305,-0.09681245,0.26334470  
, 0.41499547,0.00076048,-0.00073695,-0.00091844,-0.00015315,0.00020044,  
0.00024537,0.00000270,-0.00001910,0.00001021,0.00001914,-0.00001151,0.  
00002770,-0.00000421,0.00000015,-0.00001117,-0.00054447,-0.00034237,0.  
00022801,-0.00002860,0.00004662,-0.00002292,0.00001144,-0.00001366,0.0  
0000953,-0.00004628,-0.00003547,0.00003286,0.00000276,0.00000197,-0.00  
000361,0.00019426,0.00002873,-0.00002290,-0.00003265,-0.00001351,0.000  
01248,0.00001097,0.00000389,-0.00000184,0.00000926,0.00001173,-0.00000

760,-0.00000430,-0.00000187,0.00000006,-0.00000944,-0.00001745,0.00001  
013,-0.00000113,-0.00000051,0.00000094,-0.00029669,-0.00003949,0.00012  
614,-0.00000615,-0.00007181,-0.00005638,-0.00001419,-0.00000862,0.0000  
1934,0.00001906,0.00001019,-0.00002561,-0.00001026,0.00000403,-0.00001  
234,-0.00001191,-0.00000258,-0.00001552,-0.00000858,-0.00000214,-0.000  
00125,0.00001819,0.00001988,-0.00002929,-0.00000432,-0.00000400,-0.000  
00956,-0.00001875,0.00005011,-0.00001463,-0.00001539,-0.00000300,0.000  
01732,-0.00435592,-0.00196686,0.00315855,-0.00078799,0.00069521,0.0005  
6990,-0.00004658,0.00019267,-0.00034875,-0.00002501,0.00064094,0.00384  
167,0.00036606,0.00059336,0.00047498,0.01089969,0.01230985,0.00776217,  
0.00030564,0.00058831,-0.00138923,-0.12031353,-0.10338550,-0.05652880,  
0.12381276,0.00042085,0.00011513,-0.00042445,-0.00011798,0.00005559,0.  
00008108,0.00000815,-0.00000490,0.00001262,0.00003474,-0.00000649,0.00  
003671,-0.00000939,-0.00000134,-0.00000835,-0.00010162,-0.00004075,0.0  
0006703,0.00000617,0.00000574,-0.00002794,0.00000319,-0.00000650,0.000  
00921,-0.00001346,-0.00001056,0.00001765,0.00000175,-0.00000249,-0.000  
00744,0.00011928,0.00005100,-0.00008470,-0.00003384,-0.00000097,0.0000  
0821,0.00000856,-0.00000036,0.00000069,0.00001161,0.00000889,-0.000003  
85,-0.00000068,-0.00000028,-0.00000078,-0.00000452,-0.00001572,0.00000  
740,-0.00000092,-0.00000026,0.00000028,-0.00017122,-0.00003518,0.00004  
124,-0.00000771,-0.00002861,0.00000849,-0.00000043,-0.00000388,0.00000  
653,0.00001091,-0.00000760,-0.00001655,-0.00000045,0.00000379,-0.00000  
469,-0.00000921,0.00000681,-0.00000576,-0.00000292,-0.00000048,-0.0000  
0266,0.00001567,0.00000897,-0.00000273,-0.00000028,-0.00000299,-0.0000  
0438,-0.00002476,0.00001374,-0.00000306,-0.00000055,0.00000099,-0.0000  
0026,-0.00207186,0.00378270,-0.00186448,0.00064923,-0.00001430,0.00043  
025,0.00019606,-0.00054779,0.00053400,0.00122216,0.00243844,-0.0049354  
3,-0.00054994,-0.00043921,-0.00034318,-0.00974873,-0.00853907,-0.00644  
666,0.00113087,-0.00111993,0.00211663,-0.10336935,-0.20513412,-0.10519  
328,0.11311042,0.21153355,0.00030318,0.00016811,0.00036003,-0.00003306  
, -0.00007932,-0.00002375,-0.00000461,-0.00001159,0.00000006,-0.0000085  
2,-0.00000514,-0.00000239,0.00000377,0.00000330,-0.00000228,-0.0000489  
8,-0.00008887,0.00003104,-0.00000760,0.00002141,-0.00001218,0.00000018  
, 0.00000188,-0.00000453,0.00000287,-0.00000678,0.00000343,-0.00000219,  
0.00000428,0.00000022,-0.00000329,0.00002469,0.00000907,-0.00000425,-0.  
.00001308,0.00000125,-0.00000149,0.00000087,0.00000351,0.00000035,0.00  
000074,-0.00000233,-0.00000185,-0.00000027,0.00000068,-0.00000333,-0.0  
0000102,0.00000159,-0.00000037,0.00000001,0.00000038,0.00017766,-0.000  
00336,-0.00005004,0.00000179,0.00000586,-0.00002272,0.00000045,-0.0000  
0252,0.00000334,-0.00000269,0.00000819,0.00002061,-0.00000540,-0.00000  
012,0.00000038,0.00001266,-0.00001812,0.00000498,-0.00000019,-0.000000  
32,-0.00000196,-0.00002950,-0.00000153,-0.00000512,0.00000333,0.000002  
65,-0.00000037,-0.00000312,0.00000843,0.00001347,0.00001306,0.00001394  
, -0.00000450,0.00299767,-0.00206107,0.00373542,0.00049691,0.00043330,-  
0.00060244,-0.00033600,0.00057334,-0.00058318,0.00428769,-0.00471712,0.  
.00118367,-0.00055020,-0.00082586,-0.00030782,-0.01207642,-0.01610563,  
-0.00573143,-0.00089230,0.00234352,-0.00150772,-0.05646704,-0.10506177  
, -0.10711473,0.05862289,0.11710859,0.10533531,-0.01869785,-0.01574079,  
-0.00625073,-0.00277638,-0.00159515,0.00030137,0.00001645,-0.00005247,  
0.00003776,0.00008975,-0.00003524,0.00010477,-0.00002326,-0.00000707,-  
0.00002986,-0.00159938,0.00051995,0.00057317,-0.00004553,-0.00074331,0.  
.00036230,0.00000299,-0.00009238,0.00009317,-0.00021577,-0.00004525,-0.  
.00002678,0.00003299,-0.00002212,-0.00000539,0.00092879,-0.00048532,0.  
00012537,-0.00005024,0.00009466,-0.00009990,0.00011403,0.00002938,0.00  
003665,0.00010889,0.00001102,-0.00001047,-0.00000048,0.00000377,-0.000  
01084,0.00001281,-0.00006957,0.00004228,-0.00000067,-0.00000459,0.0000  
0652,-0.00222941,-0.00000643,0.00092259,-0.00008579,-0.00030347,-0.000  
50959,-0.00020274,-0.00003927,0.00008365,0.00019638,0.00010181,-0.0001  
7612,-0.00003539,0.00001746,-0.00005748,-0.00009531,-0.00005661,-0.000  
07420,-0.00005174,-0.00001787,0.00001051,0.00007369,0.00012105,-0.0002  
0661,-0.00000998,-0.00001731,-0.00004679,0.00003750,0.00023103,-0.0003  
4961,-0.00014268,-0.00008226,0.00007325,-0.15292446,-0.06315164,-0.016  
62169,0.05772298,-0.00656368,-0.02687213,-0.00056532,0.00138058,0.0043  
9572,-0.04874708,-0.02878591,-0.00808473,-0.00076566,-0.00054995,-0.00

061769,-0.02288909,0.04870372,0.05758519,0.00127154,0.00043122,0.00317  
488,-0.30575227,-0.07389347,0.03814623,-0.01025694,-0.00150134,0.00486  
504,0.62543061,-0.01271523,-0.00088522,0.00438225,0.00044441,-0.001346  
74,-0.00158847,-0.00000888,0.00004316,-0.00002088,-0.00004480,0.000025  
13,-0.00006079,0.00001222,-0.00000132,0.00002363,0.00138400,0.00101537  
, -0.00045944,-0.00020451,-0.00067165,0.00017830,-0.00006421,0.00001551  
, -0.00001633,0.00008519,0.00013005,-0.00011431,-0.00000224,-0.00001532  
, 0.00000356,-0.00042325,-0.00026974,0.00016043,0.00013555,0.00001203,-  
0.00004004,-0.00001915,-0.00002314,0.00002855,0.00001152,-0.00004368,-  
0.00000151,0.00000718,0.00000289,-0.00000150,0.00003317,0.00003155,-0.  
00000256,0.00000442,0.,-0.00000008,0.00234323,0.00047152,-0.00046054,0.  
.00011513,0.00030413,-0.00006840,0.00001681,-0.00002964,-0.00000096,-0.  
.00011009,0.00001204,0.00007221,0.00001693,-0.00001593,0.00002725,0.00  
008902,-0.00007195,0.00011391,0.00002433,0.00000684,0.00000059,-0.0002  
3313,-0.00006676,0.00007588,0.00004165,0.00003765,0.00002389,0.0000500  
2,-0.00015165,0.00002502,0.00010469,0.00010999,-0.00009813,-0.09462724  
, -0.20567726,-0.08842453,0.02475393,-0.02721099,-0.04240544,0.00097086  
, 0.00229482,-0.00441120,-0.03040343,-0.02348308,-0.00107722,-0.0006430  
8,-0.00045992,0.00041304,0.01511842,0.03774376,0.02025817,0.00086542,0.  
.00130744,-0.00580847,-0.02655721,-0.11054110,-0.02883096,-0.02306022,  
-0.00083931,0.00621472,0.07443296,0.46220144,-0.00398291,0.00561214,0.  
00727493,0.00181330,-0.00102616,-0.00112402,-0.00000986,0.00009408,-0.  
00003377,-0.00006537,0.00004952,-0.00009835,0.00001519,-0.00000729,0.0  
004339,0.00375917,0.00280133,-0.00169085,0.00033748,-0.00041432,0.000  
20535,-0.00007260,0.00006540,-0.00004229,0.00027412,0.00020053,-0.0001  
6235,-0.00001447,-0.00001980,0.00000291,-0.00069402,0.00009038,-0.0001  
0001,0.00006021,0.00009562,-0.00010037,-0.00001704,-0.00002758,0.00002  
622,0.00000206,-0.00006278,0.00002901,0.00002342,0.00001413,-0.0000049  
8,0.00005093,0.00005694,-0.00003344,0.00000626,0.00000108,-0.00000173,  
0.00121350,0.00000265,-0.00064760,0.00003567,0.00025388,0.00025590,0.0  
0006791,0.00006923,-0.00007851,-0.00005461,-0.00007128,0.00015363,0.00  
002741,-0.00000971,0.00005284,0.00005144,-0.00002088,0.00001105,0.0000  
3684,0.00001053,-0.00000088,-0.00013313,-0.00002239,0.00012085,0.00003  
307,0.00001996,0.00003835,0.00001220,-0.00022877,0.00017720,0.00008558  
, 0.00005338,-0.00011990,-0.04417894,-0.10226827,-0.13186851,0.00094413  
, -0.02916151,-0.01899518,0.00401838,-0.00497002,0.00086532,-0.00934007  
, -0.00179462,-0.00493380,-0.00057055,0.00048921,-0.00006925,0.02734789  
, 0.00523461,0.00087191,0.00348322,-0.00564365,0.00078242,0.08054462,-0.  
.00794042,-0.10838038,-0.01470152,-0.00326882,0.00699034,-0.14548682,0.  
.25568617,0.43316802,-0.00005016,-0.00289701,-0.00300937,-0.00079422,0.  
00053300,0.00077937,-0.00001040,0.00004367,-0.00002533,-0.00006181,0.  
00002481,-0.00006795,0.00002176,-0.00000385,0.00001773,-0.00004363,0.0  
0088059,0.00016764,0.00011595,0.00011414,-0.00003884,-0.00001662,0.000  
02962,-0.00002673,0.00005183,0.00001192,-0.00005699,-0.00000897,0.0000  
0538,0.00000153,-0.00027338,-0.00011416,0.00007056,0.00009247,-0.00000  
643,0.00005459,-0.00003411,-0.00000940,-0.00004074,-0.00004693,-0.0000  
0850,0.00001071,0.00000188,-0.00000325,-0.00000004,0.00001460,0.000030  
03,-0.00002051,0.00000113,0.00000219,-0.00000300,-0.00040581,0.0001546  
6,0.00032085,0.00001565,-0.00004588,-0.00000713,0.00000170,0.00003947,  
-0.00004681,0.00001155,0.00003213,-0.00003804,0.00000806,-0.00000520,0.  
.00000811,-0.00000094,0.00000938,0.00001237,-0.00000028,0.00000481,0.0  
0001267,0.00004877,0.00007016,0.00002780,0.00002361,0.00001320,0.00001  
377,-0.00000581,-0.00006940,0.00018169,-0.00000241,0.00002702,-0.00001  
579,0.01175574,-0.00639366,-0.00988485,-0.00125044,-0.00416369,-0.0004  
6056,0.00060279,-0.00070772,-0.00063854,-0.00077260,-0.00052373,-0.000  
45138,-0.00009883,0.00026084,-0.00020321,-0.00391983,-0.00314956,0.002  
08790,-0.00047640,0.00077849,0.00086184,-0.00834145,0.01615930,0.02023  
772,0.00059393,0.00083767,-0.00131715,-0.11774532,0.06799006,0.0949711  
1,0.12091966,0.00184684,-0.00211055,-0.00058511,0.00099829,0.00029466,  
0.00046943,0.00000520,0.00002911,-0.00000395,-0.00000041,0.00001085,-0.  
.00000789,-0.00000152,-0.00001215,0.00000443,-0.00058414,-0.00026405,0.  
.00031104,-0.00008097,0.00000623,-0.00008980,0.00001154,0.00000833,0.0  
0000869,-0.00003814,-0.00001230,0.00002415,0.00000462,-0.00001121,-0.0  
0001397,0.00005841,-0.00010656,-0.00007412,0.00002802,-0.00000420,0.00

001021,-0.00000294,0.00000884,-0.00003823,-0.00002685,0.00000597,0.000  
01644,0.00000081,-0.00000121,-0.00000106,-0.00000027,0.00000358,-0.000  
00702,0.00000008,0.00000087,-0.00000324,0.00015556,0.00024097,0.000023  
77,-0.00002662,0.00002764,0.00013267,0.00000411,0.00003921,-0.00004238  
, -0.00004727,0.00000891,-0.00002757,0.00001033,-0.00000460,0.00000747,  
0.00001464,0.00006017,0.00004484,0.00000663,0.00000518,0.00000096,0.00  
002242,-0.00002230,0.00007583,0.00000779,0.00000494,0.00001441,0.00005  
534,-0.00011740,0.00002273,0.00001386,0.00002849,-0.00001276,0.0105254  
6,-0.00978408,-0.01569554,-0.00428862,-0.00002557,-0.00396616,0.000552  
83,-0.00028312,-0.00095291,-0.00043621,-0.00044151,0.00057678,0.000293  
98,-0.00041313,0.00046430,-0.00313405,0.00323539,-0.00225827,-0.000292  
41,0.00019174,0.00035904,-0.00465447,0.00819802,0.00527742,0.00119743,  
-0.00123852,0.00204966,0.06768165,-0.13389888,-0.11380534,-0.06987740,  
0.13638655,0.00052782,0.00099356,-0.00167497,0.00120816,0.00082916,-0.  
00032296,-0.00000579,-0.00000179,-0.00000514,-0.00001870,0.00000202,-0  
.00001839,0.00000517,0.00000657,0.00000489,0.00042507,0.00026258,-0.00  
012833,0.00007984,-0.00002932,-0.00003534,0.00001083,0.00001832,-0.000  
01957,0.00002372,-0.00000873,0.00000481,-0.00000834,0.00000847,0.00000  
741,-0.00005387,0.00010536,0.00005253,0.00001601,0.00002528,-0.0000091  
3,-0.00000409,-0.00000910,-0.00002400,-0.00001233,-0.00001198,0.000015  
49,0.00000125,0.00000187,0.00000140,-0.00000924,0.00001765,-0.00001447  
,0.00000005,0.00000004,-0.00000147,-0.00031957,-0.00034258,-0.00001622  
,0.00000883,-0.00012503,-0.00008617,-0.00002093,0.00000286,0.00003994,  
0.00001334,0.00003745,-0.00002717,-0.00000948,0.00000367,-0.00001282,-  
0.00000589,-0.00001963,-0.00000789,-0.00000602,0.00000116,0.00000198,0  
.00002276,0.00000232,-0.00003695,-0.00000866,-0.00000158,-0.00001192,-  
0.00008676,0.00009780,-0.00001649,0.00000634,0.00000169,0.00001150,0.0  
0505164,-0.00823527,-0.00707664,-0.00034793,-0.00416445,0.00296339,0.0  
0046361,-0.00036650,-0.00003509,-0.00042135,0.00061813,-0.00012404,-0.  
00018293,0.00049108,-0.00056233,0.00209060,-0.00232540,0.00435279,-0.0  
0008021,-0.00012250,-0.00009566,0.00148397,-0.00376192,0.00042037,-0.0  
0101079,0.00221398,-0.00172209,0.09473803,-0.11388447,-0.18272115,-0.1  
0359189,0.12767262,0.18690868,0.00004934,0.00153957,-0.00008839,-0.000  
05386,-0.00045605,-0.00022485,-0.07127340,-0.06537401,-0.00981583,-0.1  
7888113,-0.06165714,-0.12581781,-0.00714103,-0.00660926,-0.00160671,-0  
.00081247,-0.00237741,0.00132899,0.00014705,-0.00018285,0.00015456,-0.  
09775813,0.02644639,-0.02615419,0.01362647,-0.00928968,0.00719723,-0.0  
0128415,-0.00138366,0.00104414,0.00043567,-0.00373526,0.00287749,-0.00  
303164,-0.00073331,0.00081813,-0.00007870,0.00000605,-0.00000241,-0.00  
612754,0.00033695,-0.00093922,-0.00024063,0.00098080,-0.00082127,-0.00  
932007,0.02554942,-0.02024028,-0.00014727,0.00123953,-0.00015148,-0.00  
001697,-0.00024720,0.00009141,-0.00000930,0.00004076,0.00003616,0.0000  
1086,0.00000116,-0.00001054,0.00001073,-0.00000797,0.00000861,0.000015  
77,-0.00001022,0.00000663,-0.00000931,-0.00001390,-0.00001596,0.000014  
39,0.00000323,0.00000625,-0.00002650,-0.00004671,0.00000020,0.00001200  
,0.00001078,-0.00003418,-0.00010610,0.00002315,-0.00003221,0.00008194,  
-0.00000328,-0.00006858,-0.00002888,-0.00020861,0.00001701,0.00000395,  
-0.00001223,-0.00003186,0.00003621,-0.00002126,-0.00002585,-0.00004473  
, -0.00001308,-0.00003030,-0.00000546,-0.00000209,0.00002566,-0.0000479  
5,0.00000889,0.00000567,-0.00001718,-0.00001748,0.00002199,-0.00002767  
,0.00002163,-0.00003163,-0.00002454,-0.00003716,0.00001031,-0.00011401  
,0.00005262,0.00008645,0.00006360,-0.00000805,0.00002635,0.37823499,-0  
.00012364,-0.00193816,0.00136361,0.00002775,0.00057160,-0.00019212,-0.  
07187935,-0.23326510,-0.01904236,-0.02790135,-0.13933690,-0.01123217,-  
0.02920088,-0.01163363,-0.02423552,0.00140717,0.00167140,-0.00109112,-  
0.00005842,-0.00000061,0.00022928,0.01476027,-0.13646823,0.04617858,0.  
00074786,-0.02554822,0.01280336,0.00119309,-0.00012730,-0.00083059,-0.  
00604149,0.00203823,0.00313325,-0.00015487,-0.00094285,-0.00026238,-0.  
00014697,-0.00021399,-0.00019240,-0.00186759,0.00502023,0.00033740,-0.  
00053330,0.00083224,-0.00025157,0.01763584,-0.00256891,0.00683251,-0.0  
0267070,-0.00129484,-0.00215003,0.00005591,0.00025760,-0.00027426,0.00  
003429,-0.00016949,-0.00012708,0.00001687,-0.00003046,0.00005222,-0.00  
002754,-0.00003102,-0.00003855,-0.00002485,0.00001923,-0.00002419,-0.0  
0003137,0.00000860,-0.00002335,-0.00002441,0.00001385,-0.00003862,0.00



001931,0.00013088,0.00007974,-0.00001146,-0.00002701,-0.00004288,0.000  
01190,0.00008253,-0.00005915,-0.00004327,0.00009058,0.00017493,-0.0000  
1041,0.00017694,-0.00022565,0.00004832,0.00010240,0.00005028,-0.000036  
34,0.00001703,0.00005996,0.00001062,0.00003931,0.00003629,0.00003664,-  
0.00001143,-0.00002168,0.00002596,-0.00000357,-0.00002062,0.00002989,0  
.00000681,-0.00000371,0.00000837,-0.00004006,-0.00001264,0.00002500,0.  
00000838,0.00001506,0.00008063,-0.00004911,-0.00011470,-0.00005849,-0.  
00003946,-0.00000212,0.09262115,0.52761938,0.00050020,0.00204693,-0.00  
062974,-0.00015653,-0.00065148,-0.00014754,-0.01110135,-0.01449329,-0.  
04251413,-0.12538987,-0.04025112,-0.16575114,-0.00421840,-0.00497513,0  
.00140279,-0.00152646,-0.00129154,0.00121959,0.00007951,-0.00013186,0.  
00000432,-0.01845056,0.05847172,-0.10471519,-0.00082862,0.01878531,-0.  
00959784,-0.00207138,-0.00250723,-0.00199415,0.00484981,0.00256882,0.0  
0477228,-0.00101892,-0.00117400,0.00007072,-0.00006314,-0.00037131,-0.  
00055604,-0.00111825,0.00186796,0.00482556,0.00019474,-0.00001983,0.00  
013191,-0.00865982,0.00499490,-0.00463202,0.00059819,-0.00078019,-0.00  
155143,-0.00006355,-0.00030000,0.00018393,-0.00002521,0.00008754,0.000  
05698,0.00001039,0.00001166,-0.00002584,0.00001298,0.00000514,0.000018  
14,0.00002389,-0.00001650,0.00001160,-0.00000628,-0.00001375,-0.000016  
33,0.00002465,-0.00000075,0.00001757,-0.00003746,-0.00009945,-0.000024  
53,0.00001719,0.00001962,-0.00002755,-0.00012116,0.00001750,-0.0000201  
2,0.00010458,-0.00002661,-0.00011736,-0.00006440,-0.00013682,0.0000685  
4,-0.00001179,-0.00004348,-0.00003445,0.00004050,-0.00002283,-0.000054  
44,-0.00004107,-0.00003267,-0.00003575,-0.00001377,0.00000355,0.000028  
75,-0.00004805,0.00001319,0.00000943,-0.00002835,-0.00001808,0.0000212  
9,-0.00002026,0.00002953,-0.00001283,-0.00002958,-0.00004031,0.0000045  
5,-0.00011335,0.00007019,0.00010610,0.00008671,0.00001014,0.00001934,0  
.18553704,-0.02139714,0.33854674,0.00006221,0.00100195,-0.00040033,-0.  
00000190,-0.00027446,-0.00002195,0.00325777,0.00597892,0.00375454,-0.1  
1489551,0.04005822,-0.07840340,0.00174810,0.00092427,0.00368100,-0.000  
60814,-0.00100240,0.00068356,0.00008057,0.00004188,-0.00004761,0.00309  
676,-0.00269911,-0.00131233,-0.00003498,0.00028477,0.00068314,0.000541  
47,0.00013424,-0.00063039,0.00094821,0.00119887,-0.00028261,-0.0002038  
1,-0.00011411,-0.00001514,0.00006542,-0.00005983,-0.00000180,0.0002300  
2,0.00019765,0.00012067,0.00004251,-0.00004774,0.00003723,-0.00027109,  
-0.00035033,-0.00027576,-0.00007366,0.00008197,-0.00011268,-0.00001296  
, -0.00013765,0.00007076,-0.00000088,0.00003498,0.00004433,0.00000127,0  
.00000686,-0.00001488,0.00000428,-0.00000051,0.00000463,0.00001159,-0.  
00000708,0.00000596,-0.00000325,-0.00000186,-0.00000082,0.00001015,0.0  
0000043,0.00000782,-0.00000211,-0.00003632,-0.00000015,0.00000724,0.00  
000884,-0.00000926,-0.00003458,0.00000735,-0.00000681,0.00002344,-0.00  
001210,-0.00005084,-0.00002382,-0.00008152,0.00006068,-0.00000071,-0.0  
0002997,-0.00001492,0.00001450,-0.00000959,-0.00002749,-0.00002089,-0.  
00001729,-0.00001795,-0.00000658,0.00000334,0.00001236,-0.00001851,0.0  
0000929,0.00000519,-0.00001434,-0.00000897,0.00001093,-0.00000647,0.00  
001743,-0.00000765,-0.00001331,-0.00001946,0.00000114,-0.00004713,0.00  
003228,0.00004999,0.00003660,0.00000679,0.00000687,-0.02592477,0.00453  
631,-0.02235883,0.37121001,-0.00004727,-0.00081488,0.00026570,0.000005  
18,0.00022986,0.00004267,-0.00207309,-0.00381556,-0.00147197,0.0174940  
0,-0.16142807,0.03068412,0.02169600,-0.01736460,0.02399168,0.00042280,  
0.00077168,-0.00045996,-0.00003951,-0.00004933,0.00002115,-0.00326990,  
-0.00044030,-0.00204979,0.00031348,-0.00018021,0.00027625,-0.00001451,  
-0.00037125,0.00004471,-0.00104328,-0.00002794,0.00018385,0.00052136,0  
.00016372,-0.00010463,-0.00002465,0.00000418,-0.00006661,-0.00034527,-  
0.00018331,0.00035653,-0.00007900,0.00007117,-0.00012802,0.00006564,0.  
00128639,-0.00025340,0.00007376,-0.00018746,-0.00005777,0.00000879,0.0  
0011630,-0.00006123,0.00000328,-0.00003027,-0.00003268,-0.00000160,-0.  
00000490,0.00001133,-0.00000358,0.00000007,-0.00000457,-0.00000978,0.0  
0000626,-0.00000478,0.00000292,0.00000261,0.00000271,-0.00000883,-0.00  
000025,-0.00000673,0.00000512,0.00003260,0.00000173,-0.00000571,-0.000  
00751,0.00000950,0.00003463,-0.00000652,0.00000858,-0.00002445,0.00000  
884,0.00004189,0.00001590,0.00007595,-0.00004374,-0.00000199,0.0000224  
8,0.00001097,-0.00001058,0.00000637,0.00002385,0.00001425,0.00001661,0  
.00001508,0.00000479,-0.00000373,-0.00000798,0.00001252,-0.00000667,-0

.00000495,0.00001159,0.00000623,-0.00000757,0.00000479,-0.00001364,0.00000568,0.00001131,0.00001478,-0.00000023,0.00004210,-0.00002575,-0.00004162,-0.00002841,-0.00000480,-0.00000657,0.00921328,0.02155150,0.00331371,0.00932766,0.69886118,0.00007924,0.00127768,-0.00045196,-0.0000297,-0.00036420,-0.00004514,0.00528019,0.00533736,0.00217317,-0.07663930,0.05150098,-0.12987864,0.00106564,0.00163940,0.00097563,-0.00061993,-0.00117800,0.00074185,0.00008250,0.00007294,-0.00006632,-0.00325961,-0.00212176,0.00527232,0.00037221,0.00001269,0.00125412,0.00040510,0.00033761,-0.00041279,0.00112087,0.00089301,-0.00081423,0.00005822,-0.00011438,0.00008570,0.00007653,0.00000969,0.00007118,-0.00045733,-0.00073067,0.00003848,0.00003712,0.00007572,0.00001790,-0.00061474,0.00097740,-0.00128306,-0.00005831,0.00012766,0.00025152,-0.00001403,-0.00018161,0.00009659,-0.00000307,0.00004681,0.00005569,0.00000096,0.00000804,-0.00001864,0.00000614,-0.00000045,0.00000602,0.00001513,-0.00001028,0.00000829,-0.00000327,-0.00000251,-0.00000323,0.00001321,0.00000021,0.00001139,-0.00000518,-0.00005041,-0.00000130,0.00000756,0.00001164,-0.00001333,-0.00005098,0.00001095,-0.00001250,0.00003500,-0.00001572,-0.00006307,-0.00002655,-0.00011505,0.00007312,0.00000454,-0.00003658,-0.00001716,0.00001491,-0.00000906,-0.00003792,-0.00002341,-0.00002538,-0.00002164,-0.00000718,0.00000624,0.00001177,-0.00001948,0.00001104,0.00000742,-0.00001838,-0.00000952,0.00001245,-0.00000609,0.00002233,-0.00000850,-0.00001756,-0.00002380,0.00000030,-0.00006282,0.00003946,0.00006358,0.00004476,0.00000923,0.00000902,-0.02141695,0.00255651,-0.02760303,0.23454728,0.00137892,0.40893180,-0.00003937,-0.00036044,0.00015608,0.00000930,0.00010169,0.00000379,-0.00340620,0.00090202,-0.00380603,0.00101445,0.02784825,-0.00342920,-0.00142475,0.00091680,-0.00363606,0.00021891,0.00034779,-0.00025142,-0.00002590,0.00000027,0.00001558,-0.00049858,0.00034107,-0.00016478,-0.00017805,-0.00009054,-0.00026275,-0.00006053,0.00000235,0.00011300,-0.00035234,-0.00030747,0.00019656,0.00004447,0.00009213,-0.00007331,-0.00001150,0.00000566,-0.00000858,0.00002035,0.00001677,0.00000755,-0.00001993,0.00001842,-0.00000464,0.00016528,0.00015711,0.00001464,0.00004648,-0.00004485,-0.00002415,0.00000844,0.00005034,-0.00003108,0.00000244,-0.00001676,-0.00001569,-0.0000034,-0.00000310,0.00000588,-0.00000233,-0.00000113,-0.00000351,-0.00000432,0.00000236,-0.00000230,-0.00000019,0.00000140,-0.00000043,-0.00000408,0.00000042,-0.00000322,0.00000342,0.00001605,0.00000412,-0.00000345,-0.00000350,0.00000128,0.00001200,0.00000142,-0.00000159,-0.00001102,0.00000748,0.00002151,0.00000737,0.00002907,-0.00002305,0.00000394,0.00001212,0.00000727,-0.00000721,0.00000423,0.00000945,0.00000622,0.00000584,0.00000714,0.00000368,-0.00000665,-0.00000539,0.00000759,-0.00000254,-0.00000203,0.00000509,0.00000319,-0.00000349,0.00000300,-0.00000636,0.00000167,0.00000484,0.00000617,-0.00000029,0.00001799,-0.00001235,-0.00001926,-0.00001365,-0.00000302,-0.00000259,0.00222759,0.00085996,0.00201745,-0.09582085,-0.01927809,-0.03183299,0.41131980,0.00001094,0.00023638,-0.00010526,0.00000168,-0.00006325,0.00000223,0.00483402,-0.00044405,0.00348572,0.01257189,-0.02089677,0.01322782,0.00052985,0.00206224,0.00052976,-0.00015265,-0.00023368,0.00018029,0.00001748,0.00000108,-0.00001553,0.00021220,-0.00040636,0.00101399,0.00004387,0.00011533,0.00001595,0.00006719,0.00002705,-0.00012268,0.00024265,0.00017749,-0.00008439,-0.00005963,0.00001664,-0.00000926,0.00000895,-0.00001045,0.00001221,-0.00002961,-0.00007499,0.00001924,0.00001050,-0.00000715,-0.00000434,-0.00017982,0.00005368,-0.00027304,-0.00008776,0.00007770,0.00003026,-0.00000276,-0.00003151,0.00002045,0.00000015,0.00000957,0.00001166,-0.00000021,0.00000207,-0.00000441,0.00000068,0.00000048,0.00000121,0.00000310,-0.00000228,0.00000166,-0.00000112,-0.00000026,-0.00000044,0.00000290,0.00000023,0.00000241,-0.00000042,-0.00000926,0.00000081,0.00000211,0.00000268,-0.00000276,-0.00000847,-0.00000002,-0.00000097,0.00000668,-0.00000288,-0.00001284,-0.00000567,-0.00002048,0.00001636,-0.00000081,-0.00000691,-0.00000352,0.00000401,-0.00000174,-0.00000675,-0.00000380,-0.00000476,-0.00000484,-0.00000202,0.00000139,0.00000334,-0.00000260,0.00000131,0.00000105,-0.00000391,-0.00000185,0.00000158,-0.00000175,0.00000318,0.00000044,-0.00000280,-0.00000258,-0.00000130,-0.00000909,0.00000665,0.00001247,0.00000704,0.00000345,-0.00000003,-0.00353705,0.00172590,-0.00393318,0.01980211,-0.30625612,0.0227610

4, 0.03250048, 0.67308370, -0.00000635, -0.00034604, 0.00011901, -0.00000380  
, 0.00010012, 0.00001559, -0.00315950, 0.00032114, -0.00201001, -0.00386982,  
0.03228530, -0.00099487, -0.00384685, 0.00127191, -0.00221229, 0.00017907, 0  
.00031749, -0.00019681, -0.00001847, -0.00001181, 0.00000935, -0.00019911, -  
0.00003694, -0.000061170, -0.00013695, -0.00010038, -0.00010031, -0.00006571  
, -0.00004268, 0.00007205, -0.00034252, -0.00020190, 0.00014568, 0.00006771,  
0.00003787, -0.00004315, -0.00001366, 0.00000371, -0.00001476, 0.00000495, 0  
.00005481, 0.00003828, -0.00001758, 0.00001726, -0.00000003, 0.00011641, 0.0  
0004981, 0.00000120, 0.00003346, -0.00001825, -0.00004440, 0.00000087, 0.000  
04826, -0.00002538, 0.00000093, -0.00001335, -0.00001521, 0.00000007, -0.000  
00218, 0.00000502, -0.00000185, -0.00000011, -0.00000173, -0.00000384, 0.000  
00299, -0.00000252, 0.00000040, 0.00000056, 0.00000089, -0.00000331, 0.00000  
018, -0.00000350, 0.00000075, 0.00001408, 0.00000111, -0.00000117, -0.000003  
03, 0.00000286, 0.00001285, -0.00000281, 0.00000376, -0.00000807, 0.00000495  
, 0.00001678, 0.00000423, 0.00003138, -0.00001922, -0.00000226, 0.00001018, 0  
.00000316, -0.00000221, 0.00000178, 0.00001046, 0.00000607, 0.00000735, 0.00  
000409, 0.00000172, -0.00000239, -0.00000084, 0.00000397, -0.00000264, -0.00  
000267, 0.00000456, 0.00000133, -0.00000273, 0.00000034, -0.00000625, 0.0000  
0214, 0.00000486, 0.00000606, 0.00000018, 0.00001682, -0.00000920, -0.000015  
92, -0.00001142, -0.00000221, -0.00000257, 0.00207751, 0.00103001, 0.0030968  
7, -0.02999386, -0.02076646, -0.09981658, 0.29939296, 0.03255835, 0.45268126  
, 0.00003952, 0.00018834, -0.00009522, -0.00001263, -0.00005310, 0.00000397,  
-0.00463144, -0.00096765, -0.00339990, -0.00433666, -0.00100102, 0.00015568  
, -0.00009705, -0.00006573, 0.00007009, -0.00013580, -0.00018971, 0.00014471  
, 0.00001677, -0.00001119, -0.00001099, 0.00006514, -0.00040910, -0.0005218  
, 0.00011296, -0.00002717, 0.00000949, -0.00002570, -0.00003627, -0.00004259  
, 0.00025705, 0.00010252, 0.00003784, -0.00016244, -0.00011495, 0.00008940, -  
0.00000238, -0.00000746, 0.00000173, -0.00002761, 0.00016203, -0.00011024, 0  
.00001392, -0.00000901, 0.00000121, 0.00008817, -0.00028444, 0.00007127, -0.  
00006399, 0.00004340, 0.00001609, -0.00000826, -0.00002667, 0.00001907, -0.0  
0000232, 0.00000985, 0.00000800, 0.00000049, 0.00000198, -0.00000350, 0.0000  
0130, 0.00000119, 0.00000253, 0.00000255, -0.00000107, 0.00000101, -0.000000  
02, -0.00000133, 0.00000038, 0.00000259, -0.00000011, 0.00000147, -0.0000034  
2, -0.00000881, -0.00000288, 0.00000301, 0.00000209, -0.00000070, -0.0000068  
0, -0.00000254, 0.00000282, 0.00000796, -0.00000441, -0.00001301, -0.0000059  
3, -0.00001415, 0.00001373, -0.00000458, -0.00000657, -0.00000597, 0.0000061  
5, -0.00000330, -0.00000434, -0.00000375, -0.00000233, -0.00000527, -0.00000  
270, -0.00000038, 0.00000506, -0.00000559, 0.00000138, 0.00000082, -0.000003  
04, -0.00000262, 0.00000224, -0.00000290, 0.00000332, -0.00000076, -0.000002  
51, -0.00000332, 0.00000025, -0.00000096, 0.00000757, 0.00001193, 0.00000833  
, 0.00000207, 0.00000119, 0.00258987, 0.00305596, 0.00189403, 0.00685772, 0.0  
0225309, 0.00273112, -0.13456133, -0.09895205, -0.10399719, 0.13589846, -0.0  
0000804, -0.00017753, 0.00006203, 0.00000022, 0.00004974, 0.00000766, -0.001  
83428, 0.00099381, -0.00143295, 0.00059536, 0.00167723, 0.00053674, -0.00012  
835, -0.00004530, -0.00009795, 0.00010172, 0.00016936, -0.00011688, -0.00000  
941, -0.00000149, 0.00000209, 0.00004998, -0.00012421, -0.00013176, -0.00003  
048, 0.00005363, 0.00002042, 0.00001109, -0.00001590, -0.00000226, -0.000159  
33, -0.00007357, 0.00005318, 0.00007470, 0.00003975, -0.00004593, -0.0000003  
2, 0.00000778, -0.00000448, 0.00002489, -0.00004711, 0.00004044, -0.00000919  
, 0.00000569, -0.00000258, -0.00006507, 0.00012770, 0.00004094, 0.00007927, -  
0.00004311, -0.00002323, 0.00000120, 0.00002485, -0.00001429, 0.00000069, -0  
.00000704, -0.00000744, -0.00000020, -0.00000116, 0.00000264, -0.00000089, -  
0.00000008, -0.00000120, -0.00000211, 0.00000153, -0.00000112, 0.00000063, 0  
.00000031, 0.00000063, -0.00000204, 0.00000012, -0.00000176, 0.00000089, 0.0  
0000792, 0.00000051, -0.00000117, -0.00000183, 0.00000195, 0.00000737, -0.00  
000158, 0.00000174, -0.00000538, 0.00000229, 0.00000925, 0.00000272, 0.00001  
586, -0.00000987, -0.00000012, 0.00000479, 0.00000173, -0.00000217, 0.000001  
17, 0.00000528, 0.00000256, 0.00000383, 0.00000303, 0.00000124, -0.00000104,  
-0.00000129, 0.00000238, -0.00000111, -0.00000132, 0.00000245, 0.00000101, -  
0.00000111, 0.00000102, -0.00000252, 0.00000084, 0.00000239, 0.00000257, 0.0  
0000028, 0.00000851, -0.00000504, -0.00000866, -0.00000568, -0.00000120, -0.  
00000107, 0.00007339, -0.00224629, 0.00043985, -0.01857084, -0.01346541, -0.  
01979979, -0.09552209, -0.16345652, -0.10064433, 0.10270569, 0.16924782, -0.  
00000846, 0.00015876, -0.00003452, 0.00000620, -0.00004604, -0.00001334, -0.

00384877,-0.00063539,-0.00371751,0.00035202,-0.00101566,-0.00325243,0.00015150,-0.00009360,-0.00024682,-0.00004945,-0.00015286,0.00008914,0.00000693,0.00000981,-0.00000200,-0.00077258,0.00004005,0.00032823,0.00013789,-0.00020216,0.00008564,-0.00000377,0.00001655,0.00000596,0.00001637,0.00006779,-0.00006044,0.00000938,-0.00000678,0.00001104,0.00000485,-0.00000807,-0.00000290,-0.00000786,-0.00002772,0.00002125,0.00000759,0.00000015,0.00001577,-0.00001941,-0.00004345,-0.00001761,-0.00004290,-0.00000030,-0.00000284,0.00000231,-0.00002279,0.00001009,0.00000051,0.00000459,0.00000702,-0.00000013,0.00000054,-0.00000200,0.00000059,-0.00000066,-0.00000020,0.00000171,-0.00000180,0.00000124,-0.00000087,0.00000029,-0.00000127,0.00000139,0.00000013,0.00000176,0.00000087,-0.00000582,0.00000164,-0.00000020,0.00000141,-0.00000270,-0.00000746,0.00000373,-0.00000461,0.00000373,-0.00000076,-0.00000568,-0.00000181,-0.00001786,0.00000687,0.00000325,-0.00000331,0.00000005,-0.00000016,0.00000017,-0.00000514,-0.00000244,-0.00000395,-0.00000158,-0.00000005,0.00000167,-0.00000041,-0.00000047,0.00000098,0.00000107,-0.00000212,-0.00000029,0.00000087,0.00000006,0.00000218,-0.00000085,-0.00000219,-0.00000229,-0.00000055,-0.00000727,0.00000343,0.00000677,0.00000404,0.00000098,0.00000080,0.00230636,0.00220693,0.00131421,0.00279756,0.00226885,0.00752341,-0.10326431,-0.10266626,-0.14766848,0.11666965,0.10761152,0.14992700,-0.00001019,0.00004615,-0.00000404,0.00000445,-0.00001492,-0.00000703,-0.00167696,-0.00014461,-0.00149622,0.00549805,-0.00449390,-0.00151459,0.00074645,-0.00038438,-0.00003217,0.00000014,-0.00003594,0.00000898,-0.00000096,0.00001026,0.00000318,-0.00018383,0.00000987,0.00053674,0.00004408,-0.00000928,0.00008636,0.00002547,0.00003247,-0.00000350,0.00000468,0.00003998,-0.00006629,0.00007218,0.00002010,-0.00002109,0.00000636,0.00000221,-0.00000101,-0.00001307,-0.00011117,0.00007128,0.00000050,0.00000571,0.00001050,-0.00015743,0.00007391,-0.00007988,0.00002262,-0.00001594,-0.00000662,0.00000214,-0.00000663,0.00000249,0.00000035,0.00000146,0.00000208,-0.00000028,0.00000007,-0.00000046,0.00000021,-0.00000028,-0.00000025,0.00000037,-0.00000064,0.00000053,0.00000007,0.00000031,-0.00000041,0.00000019,-0.00000011,0.00000076,0.00000083,-0.00000206,0.00000018,-0.00000079,0.00000028,-0.00000041,-0.00000176,0.00000176,-0.00000239,0.00000005,-0.00000042,-0.00000119,0.00000085,-0.00000575,0.00000126,0.00000228,-0.00000103,0.00000109,-0.00000159,0.00000077,-0.00000201,-0.00000051,-0.00000159,0.00000080,0.00000036,0.00000100,-0.00000175,0.00000067,0.00000023,0.00000064,-0.00000039,0.00000064,-0.00000001,0.00000087,0.00000080,-0.00000042,-0.00000076,-0.00000070,-0.00000020,-0.00000220,0.00000029,0.00000097,0.00000078,-0.00000005,0.00000045,-0.00076765,-0.00068019,-0.00073459,0.01178000,0.05765178,0.00889119,-0.17237435,0.02900675,-0.12018661,-0.00537391,0.00901560,-0.00982377,0.37963586,-0.00001062,-0.00022385,0.00006914,0.00000134,0.00006438,0.00001382,-0.00175811,0.00072678,-0.00123453,-0.00265617,-0.00521883,-0.00278202,0.00084047,-0.00081092,0.00077035,0.00011623,0.00021010,-0.00012628,-0.00000921,-0.00000493,-0.00000386,0.00027997,0.00013037,0.00015234,-0.00006513,0.00004411,0.00004217,0.00003335,-0.00004074,-0.00004360,-0.00024368,-0.00000938,0.00003877,0.00014227,0.00007493,-0.00007074,0.00000164,0.00000535,-0.00000995,0.00004037,-0.00010063,0.00005561,-0.00001309,0.00000463,-0.00000491,-0.00006557,0.00016123,0.00000554,0.00007894,-0.00004383,-0.00000824,0.00000111,0.00003188,-0.00001833,0.00000130,-0.00000872,-0.00000890,-0.00000044,-0.00000136,0.00000328,-0.00000098,-0.00000014,-0.00000142,-0.00000282,0.00000211,-0.00000134,0.00000118,0.00000058,0.00000144,-0.00000274,0.00000001,-0.00000226,0.00000152,0.00001014,0.00000023,-0.00000135,-0.00000239,0.00000320,0.00001053,-0.00000257,0.00000345,-0.00000758,0.00000248,0.00001129,0.00000311,0.00002088,-0.00001123,-0.00000094,0.00000571,0.00000174,-0.00000216,0.00000102,0.00000710,0.00000320,0.00000554,0.00000337,0.00000134,-0.00000176,-0.00000073,0.00000263,-0.00000135,-0.00000214,0.00000311,0.00000086,-0.00000106,0.00000103,-0.00000312,0.00000121,0.00000327,0.00000328,0.00000045,0.00001169,-0.00000614,-0.00001098,-0.00000731,-0.00000119,-0.00000164,-0.00018418,-0.00082302,0.00021390,0.02517824,-0.01517081,0.02741639,0.07185461,-0.15977420,0.07638717,-0.01023210,0.01294411,-0.01164831,-0.00037661,0.73420207,0.0001125,0.00002029,-0.00002342,-0.00000350,-0.00000571,0.00000401,-0.00

191458,-0.00010611,-0.00037341,-0.00195223,-0.00484722,0.00459542,0.00  
008128,-0.00038836,0.00089982,-0.00003460,-0.00001506,0.00000429,0.000  
00259,0.00000229,-0.00000045,0.00076264,-0.00021753,-0.00044785,-0.000  
08768,0.00016343,0.00000208,0.00005112,0.00000672,-0.00005281,0.000160  
37,0.00003416,0.00005219,-0.00008628,-0.00004112,0.00001666,0.00000184  
,0.00000361,0.00000718,0.00002831,0.00007542,-0.00005969,0.00000300,-0.  
.00000818,-0.00000847,0.00002833,-0.00012902,0.00010264,0.00001516,-0.  
00000539,0.00000546,-0.00000244,-0.00000242,0.00000323,-0.00000075,0.0  
0000174,0.00000056,0.00000014,0.00000042,-0.00000056,0.00000027,0.0000  
0039,0.00000081,0.00000031,0.00000007,0.00000004,0.00000037,-0.0000004  
3,0.00000042,0.00000036,-0.00000016,0.00000014,-0.00000078,-0.00000137  
, -0.00000135,0.00000049,0.00000028,0.00000058,-0.00000017,-0.00000092,  
0.00000132,0.00000044,-0.00000090,-0.00000255,-0.00000151,0.00000059,0.  
.00000309,-0.00000101,-0.00000137,-0.00000102,0.00000094,-0.00000066,-  
0.00000066,-0.00000084,-0.00000017,-0.00000096,-0.00000040,-0.00000017  
,0.00000109,-0.00000093,0.00000068,0.00000006,-0.00000049,-0.00000076,  
0.00000063,-0.00000054,0.00000064,-0.00000037,-0.00000018,-0.00000079,  
0.00000022,-0.00000105,0.00000126,0.00000147,0.00000151,0.00000023,0.0  
0000025,-0.00066368,-0.00011098,-0.00092805,0.00808904,0.06237852,0.01  
341117,-0.11966339,0.03065704,-0.19024576,-0.00942252,0.00942671,-0.00  
719368,0.26262896,0.00029539,0.41921046,0.00000876,-0.00002713,0.00000  
508,-0.00000375,0.00000871,0.00000321,-0.00009226,-0.00016360,-0.00009  
550,0.00013358,0.00111241,-0.00012455,-0.00030128,0.00014464,-0.000110  
26,0.00000517,0.00002129,-0.00000990,0.00000032,-0.00000225,0.00000028  
, -0.00005190,-0.00001936,-0.00004318,-0.00000919,-0.00000636,-0.000006  
52,-0.00000585,-0.00000480,0.00000412,-0.00001493,-0.00001881,0.000011  
34,-0.00000321,0.00000236,-0.00000209,-0.00000125,0.00000023,-0.000000  
73,-0.00000479,0.00000681,-0.00000104,-0.00000227,0.00000268,-0.000001  
84,0.00001466,0.00001346,-0.00000730,0.,-0.00000257,-0.00000395,-0.000  
00161,0.00000354,-0.00000154,-0.00000022,-0.00000127,-0.00000140,0.000  
00029,-0.00000010,0.00000035,-0.00000021,-0.00000002,0.00000004,-0.000  
00015,0.00000043,-0.00000040,-0.00000015,-0.00000019,0.00000019,-0.000  
00008,0.00000010,-0.00000054,-0.00000047,0.00000125,0.00000006,0.00000  
042,-0.00000019,0.00000005,0.00000062,-0.00000048,0.00000097,-0.000000  
04,0.00000054,0.00000094,-0.00000127,0.00000338,-0.00000096,-0.0000009  
0,0.00000072,-0.00000045,0.00000070,-0.00000034,0.00000090,0.00000002,  
0.00000074,-0.00000048,0.00000005,-0.00000047,0.00000104,-0.00000017,0.  
.00000019,-0.00000049,0.00000010,-0.00000058,0.00000024,-0.00000066,-0.  
.00000042,0.,0.00000048,0.00000007,0.00000018,0.00000093,-0.00000004,-  
0.00000065,-0.00000026,-0.00000014,-0.00000015,0.00032347,0.00022737,0.  
.00023024,0.00178471,0.00113564,-0.00603894,0.00198635,0.02017122,-0.0  
0150492,-0.00174724,-0.00020787,0.00277421,-0.04841276,0.01664913,-0.0  
1173509,0.04236962,0.00000405,0.00008024,-0.00005235,0.00000017,-0.000  
02229,0.00000807,0.00015321,0.00017165,0.00009492,0.00016743,-0.000506  
81,0.00014799,0.00009490,-0.00002665,0.00008927,-0.00004076,-0.0000781  
5,0.00005838,0.00000383,0.00000033,-0.00000973,0.00002700,0.00001026,0.  
.00003096,0.00002784,0.00000232,0.00003356,0.00000698,0.00000329,-0.00  
001443,0.00007249,0.00004406,-0.00003854,-0.00002097,-0.00001569,0.000  
01611,0.00000266,-0.00000231,0.00000136,0.00000299,0.00000886,-0.00000  
913,0.00000561,-0.00000495,0.00000243,-0.00001083,-0.00003965,0.000019  
99,-0.00000858,0.00000820,0.00000179,-0.00000177,-0.00001048,0.0000103  
3,-0.00000024,0.00000512,0.00000544,-0.00000054,0.00000119,-0.00000228  
,0.00000039,0.00000077,0.00000075,0.00000128,-0.00000105,0.00000081,-0.  
.00000003,0.00000012,0.00000024,0.00000129,-0.00000010,0.00000138,-0.0  
0000002,-0.00000441,-0.00000036,0.00000079,0.00000130,-0.00000013,-0.0  
0000175,-0.00000145,0.00000070,0.00000209,-0.00000202,-0.00000563,-0.0  
0000189,-0.00000794,0.00000944,-0.00000110,-0.00000397,-0.00000144,0.0  
0000133,-0.00000024,-0.00000285,-0.00000051,-0.00000236,-0.00000191,-0.  
.00000116,0.00000090,0.00000105,0.00000005,0.00000029,0.00000061,-0.00  
000169,-0.00000042,0.00000006,-0.00000033,0.00000126,0.00000119,-0.000  
00095,-0.00000014,-0.00000114,-0.00000253,0.00000218,0.00000505,0.0000  
0214,0.00000219,-0.00000068,-0.00040686,-0.00030487,-0.00034272,0.0012  
5531,0.00149256,0.00139255,-0.00028400,-0.00878474,-0.00030008,-0.0000  
1198,0.00079816,0.00000548,0.01688381,-0.33309338,0.01813906,-0.018440

90, 0.35332451, -0.00000968, -0.00001468, 0.00001846, 0.00000360, 0.00000279, -0.00000501, -0.00003458, -0.00019803, 0.00001896, -0.00012848, 0.00099402, 0.00012466, -0.00007813, 0.00013989, -0.00027748, 0.00001681, 0.00002068, -0.00002149, -0.00000354, 0.00000181, 0.00000436, -0.00003681, -0.00003212, -0.00001632, -0.00001469, 0.00000076, -0.00003968, -0.00000694, 0.00000511, 0.00001298, -0.00001221, -0.00002735, 0.00002266, -0.00000587, 0.00000074, -0.00000263, -0.00000140, 0.00000099, 0.00000049, -0.00000557, 0.00000888, -0.00000179, -0.00000105, 0.00000230, 0.00000009, 0.00001122, -0.00000275, -0.000001730, -0.00000249, 0.00000221, 0.00000382, 0.00000230, 0.00000198, -0.00000261, 0.00000045, -0.00000139, -0.00000093, -0.00000008, -0.00000034, 0.00000046, -0.00000032, -0.00000021, -0.00000062, -0.00000024, -0.00000015, 0., -0.00000022, 0.00000015, -0.00000057, -0.00000035, 0.00000019, -0.00000005, 0.00000067, 0.00000117, 0.00000104, -0.00000075, -0.00000030, -0.00000055, -0.00000010, 0.00000113, -0.00000171, -0.00000070, 0.00000081, 0.00000212, 0.00000131, 0.00000022, -0.00000274, 0.00000179, 0.00000117, 0.00000142, -0.00000162, 0.00000080, 0.00000022, 0.00000018, -0.00000014, 0.00000140, 0.00000069, 0.00000050, -0.00000161, 0.00000132, -0.00000030, 0.00000011, 0.00000036, 0.00000085, -0.00000045, 0.00000094, -0.00000038, 0.00000014, 0.00000009, 0.00000041, -0.00000026, 0.00000069, -0.00000133, -0.00000168, -0.00000115, -0.00000030, -0.00000010, 0.00031961, 0.00027855, 0.00023847, -0.00601005, 0.00128255, 0.00089440, -0.00146882, 0.02175769, 0.00186550, 0.00258863, -0.00031350, -0.00151520, -0.01186398, 0.01817613, -0.05021541, 0.01770219, -0.01986493, 0.04500647, -0.00003944, -0.00019854, 0.00007768, 0.00001042, 0.00005694, 0.00000419, -0.00009441, -0.00051210, 0.00003766, -0.00303201, 0.00152034, -0.00212904, 0.00014261, -0.00009321, -0.00014765, 0.00012248, 0.00019306, -0.00012655, -0.00001813, -0.00000157, 0.00000738, -0.00000218, 0.00006860, -0.00008485, -0.00006558, -0.00002416, -0.00007182, -0.00002283, -0.00002746, 0.00000573, -0.00024127, -0.00007449, 0.00008707, 0.00008020, 0.00005367, -0.00004339, -0.00000568, 0.00000057, -0.00001010, 0.00001246, -0.00002338, 0.00002378, -0.00001118, 0.00000674, -0.00000615, 0.00003510, 0.00009655, 0.00000527, 0.00002569, -0.00002683, -0.00001265, 0.00000657, 0.00002908, -0.00001591, 0.00000188, -0.00000710, -0.00000740, -0.00000087, -0.00000124, 0.00000262, -0.00000144, 0.00000006, -0.00000160, -0.00000235, 0.00000100, -0.00000090, 0.00000039, 0.00000113, 0.00000024, -0.00000213, 0.00000005, -0.00000117, 0.00000252, 0.00000776, 0.00000155, -0.00000209, -0.00000171, 0.00000197, 0.00000915, -0.00000107, 0.00000019, -0.00000743, 0.00000245, 0.00001098, 0.00000744, 0.00001554, -0.00001086, 0.00000118, 0.00000570, 0.00000511, -0.00000479, 0.00000309, 0.00000496, 0.00000573, 0.00000222, 0.00000488, 0.00000142, 0.00000049, -0.00000485, 0.00000640, -0.00000283, -0.00000041, 0.00000308, 0.00000339, -0.00000385, 0.00000251, -0.00000436, 0.00000302, 0.00000267, 0.00000581, -0.00000151, 0.00001161, -0.00000787, -0.00001107, -0.00000943, -0.00000100, -0.00000226, 0.00139655, 0.00084047, 0.00149804, -0.00745689, -0.01890496, -0.00082264, -0.02230063, 0.00789100, -0.03260828, 0.00259690, 0.00217494, -0.00520399, -0.15654533, -0.08836258, -0.10142109, 0.00510491, 0.00309503, 0.00174594, 0.40592694, 0.00000556, 0.00006214, -0.00003593, -0.00000051, -0.00001573, 0.00000491, 0.00171667, 0.00072214, 0.00085355, 0.00352678, 0.00039460, 0.00415174, -0.00026359, 0.00057044, -0.00020149, -0.00003644, -0.00006838, 0.00005705, 0.00000606, -0.00000205, -0.00001070, -0.00010992, -0.00009542, 0.00017854, 0.00005487, 0.00000195, 0.00002241, 0., -0.00000434, -0.00002585, 0.00001672, 0.00005485, -0.00002981, 0.00000756, 0.00002088, -0.00000804, 0.00000265, -0.00000540, 0.00000047, -0.00000500, -0.00004304, 0.00000536, 0.00000198, -0.00000005, 0.00000426, -0.00004490, 0.00006031, -0.00005883, -0.00002426, 0.00002178, 0.00000894, -0.00000146, -0.00000825, 0.00000634, 0., 0.00000285, 0.00000387, -0.00000015, 0.00000064, -0.00000137, 0.00000039, 0.00000021, 0.00000040, 0.00000084, -0.00000059, 0.00000044, -0.00000032, 0.00000007, 0.00000013, 0.00000087, -0.00000003, 0.00000071, -0.00000069, -0.00000265, 0.00000011, 0.00000087, 0.00000088, -0.00000052, -0.00000189, -0.00000068, 0.00000058, 0.00000189, -0.00000091, -0.00000085, -0.00000211, -0.00000557, 0.00000604, -0.00000100, -0.00000234, -0.00000160, 0.00000184, -0.00000073, -0.00000166, -0.00000083, -0.00000096, -0.00000204, -0.00000091, 0.00000004, 0.00000183, -0.00000151, 0.00000045, 0.00000020, -0.00000115, -0.00000099, 0.00000055, -0.00000102, 0.00000077, -0.00000005, -0.00000071, -0.00000071, -0.00000021, -0.00000202, 0.00000220, 0.00000003, 0.00000208, 0.00000113, -0.00000015, -0.00154693, -0.00032567, -0.001388

65, -0.01995019, -0.05762522, -0.02247120, -0.02431984, 0.06186738, -0.02552  
314, 0.00187647, -0.00051682, 0.00234540, -0.04397467, -0.19781273, -0.04755  
336, -0.01806156, -0.01364231, -0.01950622, -0.02141195, 0.66789231, -0.0000  
1510, -0.00021528, 0.00006469, 0.00000149, 0.00006444, 0.00001363, -0.000093  
99, -0.00049916, -0.00032342, -0.00197747, 0.00180017, -0.00313475, -0.00009  
896, -0.00009366, -0.00002702, 0.00011494, 0.00019947, -0.00012077, -0.00001  
394, -0.00000421, 0.00000312, -0.00011837, 0.00013783, 0.00006258, -0.000089  
57, -0.00005870, -0.00006743, -0.00001428, -0.00003209, 0.00001614, -0.00023  
442, -0.00007282, 0.00006955, 0.00009214, 0.00005606, -0.00004462, -0.000004  
07, 0.00000161, -0.00001041, 0.00000101, -0.00004308, 0.00002999, -0.0000133  
5, 0.00000988, -0.00000796, 0.00003804, 0.00013306, -0.00002460, 0.00002725,  
-0.00002809, -0.00001396, 0.00000194, 0.00003085, -0.00001467, 0.00000107, -  
0.00000771, -0.00000800, -0.00000042, -0.00000111, 0.00000259, -0.00000123,  
0.00000010, -0.00000110, -0.00000228, 0.00000158, -0.00000140, 0.00000034, 0  
.00000079, 0.00000084, -0.00000195, 0., -0.00000170, 0.00000164, 0.00000835,  
0.00000090, -0.00000114, -0.00000164, 0.00000237, 0.00000958, -0.00000221, 0  
.00000245, -0.00000685, 0.00000263, 0.00001039, 0.00000305, 0.00001925, -0.0  
0000876, -0.00000083, 0.00000529, 0.00000313, -0.00000276, 0.00000200, 0.000  
00559, 0.00000464, 0.00000346, 0.00000319, 0.00000121, -0.00000046, -0.00000  
175, 0.00000505, -0.00000165, -0.00000148, 0.00000256, 0.00000137, -0.000002  
35, 0.00000060, -0.00000418, 0.00000233, 0.00000335, 0.00000465, -0.00000091  
, 0.00001204, -0.00000659, -0.00001035, -0.00000821, -0.00000092, -0.0000024  
1, 0.00146937, 0.00079219, 0.00150284, -0.00071854, -0.02065523, -0.00770406  
, -0.03272642, 0.00816468, -0.02711971, -0.00493347, 0.00251396, 0.00193025,  
-0.10157731, -0.09554765, -0.17276989, 0.00168025, 0.00337793, 0.00544150, 0  
.29841150, -0.02270247, 0.45302652, 0.00001045, -0.00005932, 0.00002260, -0.  
00000521, 0.00001786, 0.00000077, -0.00013741, 0.00006607, -0.00000989, -0.0  
0063011, 0.00009643, 0.00061475, 0.00001022, -0.00001784, -0.00001220, 0.000  
01528, 0.00005112, -0.00003222, 0.00000027, -0.00000303, 0.00000486, 0.00011  
069, -0.00003001, -0.00009912, -0.00002664, 0.00002167, -0.00002590, 0.00000  
019, -0.00000516, 0.00000617, -0.00001878, -0.00002574, 0.00003020, -0.00000  
280, 0.00000243, -0.00000539, -0.00000189, 0.00000227, 0.00000050, 0.0000011  
4, 0.00000865, -0.00000560, -0.00000322, 0.00000104, -0.00000383, 0.00001647  
, 0.00000426, 0.00000480, 0.00000528, -0.00000263, 0.00000113, -0.00000160, 0  
.00000783, -0.00000531, -0.00000037, -0.00000305, -0.00000382, 0.00000053, -  
0.00000058, 0.00000134, -0.00000008, -0.00000029, 0., -0.00000079, 0.0000009  
6, -0.00000074, 0.00000015, -0.00000030, 0.00000025, -0.00000068, -0.0000000  
3, -0.00000107, -0.00000065, 0.00000279, -0.00000052, 0.00000009, -0.0000007  
3, 0.00000054, 0.00000155, -0.00000016, 0.00000123, -0.00000091, 0.00000106,  
0.00000273, -0.00000053, 0.00000739, -0.00000464, -0.00000093, 0.00000230, -  
0.00000025, 0.00000053, -0.00000055, 0.00000226, -0.00000007, 0.00000221, 0.  
00000022, 0.00000038, -0.00000115, 0.00000101, -0.00000101, 0.00000024, -0.0  
0000080, 0.00000088, -0.00000070, 0.00000053, -0.00000092, -0.00000085, -0.0  
0000101, 0.00000091, -0.00000025, 0.00000101, 0.00000183, -0.00000068, -0.00  
000274, -0.00000071, -0.00000136, 0.00000037, -0.00004206, -0.00002126, 0.00  
007660, -0.00006640, -0.00060041, 0.00033869, 0.00277371, -0.00288525, -0.00  
453083, -0.00015155, 0.00048750, -0.00048468, -0.00702387, 0.00896080, -0.01  
046810, -0.00170877, -0.00017923, 0.00240327, -0.15201099, 0.07072761, -0.12  
677402, 0.15426044, 0.00000465, 0.00003097, -0.00002296, -0.00000026, -0.000  
00922, 0.00000549, -0.00003264, 0.00013445, -0.00002957, 0.00023399, 0.00027  
487, 0.00024141, -0.00011640, 0.00001607, -0.00014133, -0.00001354, -0.00002  
764, 0.00002185, 0.00000140, 0.00000086, -0.00000735, 0.00001479, 0.00000376  
, 0.00000992, -0.00000085, 0.00000777, 0.00001586, 0.00000507, -0.00000230, -  
0.00001154, 0.00002256, 0.00001957, -0.00001713, -0.00000543, -0.00000212, 0  
.00000230, 0.00000176, -0.00000083, 0.00000002, 0.00000395, 0.00000238, -0.0  
0000225, 0.00000145, -0.00000089, 0.00000082, -0.00000303, -0.00000695, 0.00  
000580, 0.00000156, 0.00000056, -0.00000044, -0.00000111, -0.00000421, 0.000  
00389, 0.00000001, 0.00000170, 0.00000249, -0.00000020, 0.00000054, -0.00000  
099, 0.00000004, 0.00000025, 0.00000006, 0.00000059, -0.00000040, 0.00000034  
, -0.00000007, 0.00000006, 0.00000015, 0.00000046, 0.00000008, 0.00000046, 0.  
00000020, -0.00000128, 0.00000025, 0.00000027, 0.00000042, -0.00000019, -0.0  
0000069, -0.00000045, 0.00000016, 0.00000065, -0.00000061, -0.00000186, -0.0  
0000207, -0.00000319, 0.00000439, -0.00000002, -0.00000230, -0.00000099, 0.0  
0000021, -0.00000008, -0.00000130, -0.00000098, -0.00000097, -0.00000042, -0

.00000024,0.00000044,0.00000040,0.00000030,0.00000053,-0.00000003,-0.00000093,-0.00000026,0.00000066,0.00000052,0.00000146,0.00000062,-0.00000039,-0.00000079,-0.00000036,-0.00000121,0.00000091,0.00000210,0.00000136,0.00000138,-0.00000037,-0.00015341,-0.00015064,-0.00009704,-0.00052678,-0.00109546,-0.00058282,-0.00226077,-0.00163046,-0.00244223,-0.00045393,0.00043648,-0.00051987,-0.01220500,0.01158301,-0.01321426,0.00039073,0.00079344,0.00041586,0.07066566,-0.10615013,0.07652875,-0.07618835,0.10853558,-0.00001692,-0.00006245,0.00004300,0.00000476,0.00001663,-0.00000740,-0.00019470,0.00006903,-0.00023486,0.00059657,-0.00000172,-0.00052368,-0.00002262,0.00002046,0.00001298,0.00004423,0.00006395,-0.00004921,-0.00000553,0.00000072,0.00000641,-0.00009179,0.00002984,0.00007400,-0.00000599,-0.00000876,-0.00000833,-0.00000344,0.00000024,0.00001031,-0.00008223,-0.00003453,0.00001751,0.00003909,0.00002098,-0.00001852,-0.00000128,0.00000179,-0.00000194,-0.00000047,-0.00002992,0.00002110,-0.00000396,0.00000391,0.00000089,-0.00001638,0.00005573,-0.00002301,0.00001334,-0.00000975,-0.00000222,0.00000349,0.00000865,-0.00000815,0.00000061,-0.00000327,-0.00000360,-0.00000004,-0.00000089,0.00000164,-0.00000031,-0.00000044,-0.00000071,-0.00000111,0.00000055,-0.00000035,0.00000026,0.00000023,-0.00000014,-0.00000109,-0.00000002,-0.00000070,0.00000059,0.00000302,0.00000026,-0.00000102,-0.00000097,0.00000046,0.00000224,0.00000083,-0.00000087,-0.00000237,0.00000116,0.00000447,0.00000396,0.00000466,-0.00000732,0.00000121,0.00000299,0.00000196,-0.00000182,0.00000079,0.00000212,0.00000166,0.00000135,0.00000205,0.00000073,-0.00000031,-0.00000209,0.00000083,-0.00000106,0.,0.00000162,0.00000133,-0.00000110,0.00000106,-0.00000135,-0.00000014,0.00000061,0.00000130,0.00000036,0.00000279,-0.00000253,-0.00000431,-0.00000287,-0.00000144,0.00000023,0.00012033,-0.00012366,0.00003878,0.00038360,-0.00066114,0.00001202,-0.00463436,-0.00303713,0.00192010,-0.00036339,0.00058917,-0.00018099,-0.01031900,0.00983284,-0.00856143,0.00239910,-0.00019832,-0.00133734,-0.12692573,0.07655280,-0.17221374,0.14017721,-0.08252642,0.17650508,-0.00002539,0.00005762,-0.00002547,0.00001218,-0.00001891,0.00000252,0.00059769,0.00050198,0.00034362,0.00541627,-0.00295110,0.00006265,-0.00069190,0.00038077,0.00011450,0.00000769,-0.00003110,0.00001788,-0.00000848,0.00000818,-0.00001948,-0.00040553,-0.00014778,0.00038648,-0.00002660,0.00003839,0.00002948,0.00001680,-0.00000197,-0.00003175,0.00000833,0.00002774,-0.00003189,0.00003405,0.00002523,-0.00001925,0.00000627,0.00000029,0.00000201,-0.00003949,-0.00008025,0.00001306,-0.00000242,0.00001198,-0.00000163,-0.00003920,0.00017762,-0.000012252,0.00000132,0.00000013,0.00001476,0.00000409,-0.00000749,0.00000409,0.00000101,0.00000345,0.00000554,-0.00000093,0.00000074,-0.00000162,-0.00000002,0.00000026,-0.00000030,0.00000083,-0.00000104,0.00000102,0.00000004,0.00000063,0.00000032,0.00000057,0.00000004,0.00000121,0.00000163,-0.00000254,0.00000080,-0.00000039,0.00000065,-0.00000005,0.00000015,-0.00000025,-0.00000137,-0.00000101,-0.00000124,-0.00000218,0.00000068,-0.00000950,0.00000723,0.00000207,-0.00000557,0.00000045,-0.00000233,0.00000139,-0.00000323,0.00000129,-0.00000410,0.00000037,-0.00000029,0.00000187,-0.00000291,0.00000338,-0.00000018,0.00000104,-0.00000104,0.00000177,-0.00000077,0.00000398,0.00000307,0.00000272,-0.00000126,0.00000013,-0.00000125,-0.00000139,0.00000042,0.00000318,0.00000030,0.00000280,-0.00000063,-0.00034221,0.00020754,-0.00195101,-0.02466179,-0.02344132,-0.03193667,-0.01389929,0.02004904,-0.00905391,-0.00042784,0.00063279,0.00051493,0.02451614,-0.01505220,0.01778678,0.00190870,-0.00249425,-0.00540355,-0.09329649,-0.00767974,-0.03375270,0.00166659,0.02034714,-0.00067436,0.40152559,0.00002355,0.00011225,-0.00008054,-0.00000450,-0.00003612,0.00001711,-0.00085877,0.00051384,-0.00048705,-0.00575559,-0.00335581,-0.00628789,-0.00036735,-0.00064006,-0.00042490,-0.00005486,-0.00009583,0.00007033,0.00000782,-0.00000156,-0.00001778,-0.00035935,-0.00010540,-0.00045833,0.00002690,0.00001677,0.00008586,0.00001390,-0.00000394,0.00001123,0.00015307,-0.00000756,-0.00006782,-0.00008022,-0.00006661,0.00005313,0.00000169,0.00000262,0.00000379,-0.00003584,0.00010195,-0.00001181,0.00000619,-0.00000040,-0.00000716,0.00006820,-0.00005498,0.00004380,0.00000200,-0.00000533,-0.00000653,-0.00000480,-0.00001558,0.00001511,-0.00000095,0.00000696,0.00000771,-0.00000058,0.00000190,-0.00000334,0.00000056,0.00000115,0.00000085,0.00000



199,-0.00000137,0.00000120,0.00000017,-0.00000015,0.00000031,0.0000016  
7,0.00000003,0.00000175,-0.00000048,-0.00000569,-0.00000055,0.00000097  
,0.00000154,-0.00000036,-0.00000323,-0.00000177,0.00000088,0.00000364,  
-0.00000280,-0.00000759,-0.00000545,-0.00001060,0.00001354,-0.00000080  
, -0.00000745,-0.00000387,0.00000146,-0.00000069,-0.00000416,-0.0000037  
5,-0.00000285,-0.00000131,-0.00000129,0.00000105,0.00000135,-0.0000012  
8,0.00000156,0.00000065,-0.00000282,-0.00000074,0.00000212,0.00000145,  
0.00000494,0.00000104,-0.00000182,-0.00000309,-0.00000052,-0.00000586,  
0.00000351,0.00000728,0.00000574,0.00000400,-0.00000039,-0.000006544,0.  
00017302,-0.00030509,0.01059207,0.06310841,0.01199507,0.02229742,-0.04  
289905,0.02344386,0.00073804,-0.00058569,0.00063157,-0.04805286,-0.039  
40534,-0.05192269,-0.00196694,-0.00011117,-0.00219392,0.03665046,-0.32  
630201,0.03935681,-0.00083644,-0.00779196,-0.00089033,0.02286829,0.685  
71592,0.00002125,0.00004526,-0.00004569,-0.00000598,-0.00001155,0.0000  
1431,0.00085468,0.00073027,0.00031619,-0.00027319,-0.00280021,0.006029  
03,-0.00002070,0.00017038,-0.00056192,-0.00003673,-0.00004994,0.000046  
22,0.00000490,0.00000251,-0.00001555,0.00016706,-0.00026744,-0.0001226  
6,-0.00001165,0.00006997,0.00003330,0.00002108,-0.00000922,-0.00006577  
,0.00003306,0.00007575,-0.00000862,-0.00000925,0.00002368,-0.00001878,  
0.00000437,-0.00000579,-0.00000219,0.00001105,-0.00000508,0.00001809,-  
0.00000183,0.00000058,-0.00000206,-0.00004764,0.00004635,-0.00005687,-  
0.00000594,0.00000246,-0.00000682,-0.00000427,-0.00000637,0.00000609,0.  
,0.00000174,0.00000381,0.00000018,0.00000096,-0.00000159,0.,0.0000001  
6,0.00000019,0.00000104,-0.00000029,0.00000018,-0.00000045,-0.00000002  
,0.00000037,0.00000081,0.00000018,0.00000033,0.00000024,-0.00000139,0.  
00000058,0.00000087,0.00000065,-0.00000047,-0.00000114,-0.00000052,0.0  
0000096,0.00000091,-0.00000047,-0.00000296,-0.00000632,-0.00000196,0.0  
0000845,-0.00000075,-0.00000502,-0.00000315,0.00000091,-0.00000077,-0.  
00000230,-0.00000294,-0.00000132,-0.00000076,-0.00000044,0.00000017,0.  
00000142,-0.00000125,0.00000200,-0.00000009,-0.00000176,-0.00000118,0.  
00000240,0.00000090,0.00000407,-0.00000019,-0.00000080,-0.00000353,0.0  
0000062,-0.00000320,0.00000278,0.00000367,0.00000455,0.00000185,0.0000  
0005,-0.00232595,0.00011230,-0.00112718,-0.03146400,-0.02533835,-0.030  
11076,-0.00937499,0.02190453,-0.01490926,0.00041453,0.00061856,-0.0001  
7715,0.01785347,-0.01660058,0.02723673,-0.00536062,-0.00273176,0.00103  
294,-0.03373438,-0.00885507,-0.09871422,-0.00078060,0.02206719,0.00163  
521,0.29137774,0.02594575,0.44797238,0.00001419,-0.00008945,0.00000433  
, -0.00000698,0.00002847,0.00001615,-0.00004883,-0.00014290,-0.00005736  
, -0.00058936,-0.00079119,-0.00107035,-0.00001859,-0.00007743,0.0000119  
0,0.00002865,0.00007170,-0.00003461,-0.00000057,-0.00000532,-0.0000004  
5,-0.00011443,-0.00001752,-0.00000630,-0.00001876,0.00000318,-0.000010  
90,-0.00000135,-0.00000970,0.00000630,-0.00005704,-0.00003708,0.000023  
92,0.00001509,0.00001451,-0.00001064,-0.00000222,0.00000131,-0.0000028  
8,-0.00001366,-0.00000669,0.00000628,-0.00000585,0.00000544,-0.0000054  
3,0.00001409,0.00005429,-0.00002889,0.00000611,-0.00001107,-0.00000251  
, -0.00000332,0.00001300,-0.00000228,-0.00000012,-0.00000245,-0.0000028  
5,-0.00000009,-0.00000003,0.00000047,-0.00000034,0.00000044,0.,-0.0000  
0067,0.00000068,-0.00000069,0.00000015,0.00000016,0.00000059,-0.000000  
47,-0.00000005,-0.00000061,0.00000015,0.00000302,-0.00000006,0.0000001  
8,-0.00000034,0.00000118,0.00000382,-0.00000221,0.00000275,-0.00000177  
,0.00000081,0.00000274,-0.00000184,0.00001006,-0.00000044,-0.00000216,  
0.00000137,-0.00000048,0.00000049,0.00000004,0.00000240,0.00000042,0.0  
0000232,0.00000054,0.00000003,-0.00000068,0.00000137,0.00000060,0.0000  
0010,-0.00000111,0.00000041,-0.00000067,0.00000021,-0.00000111,-0.0000  
0116,0.00000056,0.00000167,0.00000086,-0.00000014,0.00000485,-0.000001  
88,-0.00000342,-0.00000184,0.00000012,-0.00000137,0.00023064,0.0004432  
6,0.00018020,0.00290053,0.00247946,-0.00495977,-0.00052909,0.00052318,  
0.00050133,-0.00052220,-0.00005093,0.00051404,0.00440477,0.00077460,-0.  
.00267323,0.00015943,0.00017510,-0.00001312,0.00465156,0.00255543,0.00  
164264,-0.00174112,-0.00029638,0.00222571,-0.12897154,-0.08917711,-0.1  
0086187,0.12929321,-0.00000444,-0.00002598,0.00002834,0.00000019,0.000  
00713,-0.00000884,-0.00006413,-0.00001763,-0.00004365,0.00033589,0.000  
56200,0.00030823,0.00001465,0.00002281,0.00000409,0.00001329,0.0000258  
1,-0.00002259,-0.00000115,0.00000064,0.00000651,0.00005534,0.00003538,

0.00002183,-0.00000659,-0.00000241,-0.00001410,-0.00000314,0.00000169,  
0.00000640,-0.00002432,-0.00001301,0.00001147,0.00000937,0.00000469,-0.  
.00000487,-0.00000084,0.00000105,0.00000005,0.00000609,-0.00000628,0.0  
0000094,-0.00000113,-0.00000019,0.00000060,-0.00000062,-0.00000290,0.0  
0000485,0.00000388,-0.00000160,0.00000038,0.00000140,0.00000309,-0.000  
00533,-0.00000004,-0.00000211,-0.00000281,0.00000041,-0.00000070,0.000  
00132,0.00000008,-0.00000054,-0.00000010,-0.00000070,0.00000060,-0.000  
00039,0.00000016,-0.00000017,-0.00000012,-0.00000063,-0.00000011,-0.00  
000068,-0.00000034,0.00000149,-0.00000048,-0.00000035,-0.00000063,0.00  
000018,0.00000037,0.00000106,-0.00000043,-0.00000074,0.00000069,0.0000  
0211,0.00000219,0.00000302,-0.00000552,0.00000036,0.00000203,0.0000007  
5,-0.00000032,-0.00000017,0.00000128,0.00000057,0.00000102,0.00000056,  
0.00000036,-0.00000072,-0.00000064,-0.00000116,-0.00000026,0.00000015,  
0.00000112,0.00000027,-0.00000027,-0.00000002,-0.00000071,-0.00000129,  
0.00000008,-0.00000015,0.00000108,0.00000003,-0.00000038,-0.00000206,-  
0.00000052,-0.00000195,0.00000121,0.00012763,-0.00015470,0.00020004,0.  
00202501,-0.00023083,0.00219131,0.00062735,-0.00045702,0.00066598,-0.0  
0002606,0.00006795,-0.00003915,0.00142303,-0.00557852,0.00151286,-0.00  
090372,-0.00077768,-0.00098117,-0.01842425,-0.01256072,-0.02001377,0.0  
0027610,0.00103802,0.00031163,-0.08968512,-0.15653160,-0.09734668,0.09  
627395,0.16286901,-0.00003112,-0.00008635,0.00002324,0.00001030,0.0000  
2383,0.00000617,-0.00006522,-0.00012250,-0.00001202,-0.00110729,-0.000  
86783,-0.00060183,0.00001136,-0.00006328,0.00000800,0.00006066,0.00008  
994,-0.00005642,-0.00001170,-0.00000316,-0.00000154,-0.00004085,-0.000  
07533,-0.00006312,-0.00003321,0.00001478,-0.00002776,-0.00000138,-0.00  
001272,0.00000346,-0.00008750,-0.00004675,0.00004608,0.00002984,0.0000  
1888,-0.00001873,-0.00000253,0.00000137,-0.00000275,-0.00000800,-0.000  
01070,0.00001696,-0.00000405,0.00000446,-0.00000352,0.00001225,0.00005  
332,-0.00002447,0.00000757,-0.00000870,-0.00000204,0.00000440,0.000013  
65,-0.00000489,0.00000109,-0.00000118,-0.00000174,-0.00000112,-0.00000  
015,0.00000044,-0.00000067,0.00000064,-0.00000055,-0.00000092,0.000000  
02,0.00000003,0.00000050,0.00000081,0.00000047,-0.00000073,-0.00000009  
,0.00000009,0.00000150,0.00000238,0.00000048,-0.00000093,-0.00000040,0.  
.00000149,0.00000546,-0.00000213,0.00000070,-0.00000372,0.00000021,0.0  
0000382,0.00000533,0.00000455,-0.00000233,0.00000002,0.00000180,0.0000  
0278,-0.00000225,0.00000200,0.00000199,0.00000458,-0.00000003,0.000001  
66,0.00000007,0.00000080,-0.00000264,0.00000483,-0.00000245,0.00000010  
,0.00000129,0.00000237,-0.00000325,0.00000187,-0.00000262,0.00000361,0.  
.00000122,0.00000503,-0.00000208,0.00000688,-0.00000436,-0.00000413,-0.  
0.00000615,0.00000118,-0.00000221,0.00027691,0.00042781,0.00005419,-0.0  
0494474,0.00268977,0.00212182,0.00045729,0.00060955,-0.00045977,0.0004  
7771,-0.00006715,-0.00047899,-0.00262664,0.00081672,0.00398369,-0.0000  
1628,0.00019401,0.00015453,0.00160656,0.00279614,0.00491440,0.00222640  
, -0.00031949,-0.00138793,-0.10089104,-0.09691367,-0.14554906,0.1127441  
3,0.10457001,0.14776785,-0.00006343,-0.00020077,0.00009338,0.00002247,  
0.00005392,-0.00000310,-0.00152566,-0.00131094,-0.00057509,-0.02820975  
, -0.00754703,-0.03644826,-0.00037814,-0.00212606,0.00071570,0.00016119  
, 0.00023263,-0.00016210,-0.00003041,0.00000231,-0.00000323,-0.00034657  
, -0.00012954,-0.00082038,-0.00014763,-0.00005820,-0.00004083,-0.000034  
96,-0.00005179,0.00000721,-0.00024505,-0.00011873,0.00011446,0.0000663  
0,-0.00000169,-0.00000500,-0.00000749,0.00000302,-0.00001592,-0.000034  
70,0.00006484,0.00006094,-0.00000856,0.00001091,-0.00001557,0.00015931  
, 0.00006427,0.00005323,0.00003102,-0.00004875,-0.00002022,0.00001022,0.  
.00002918,-0.00001774,0.00000225,-0.00000586,-0.00000759,-0.00000157,-  
0.00000161,0.00000296,-0.00000118,-0.00000003,-0.00000146,-0.00000275,  
0.00000091,-0.00000046,0.00000132,0.00000137,0.00000061,-0.00000246,-0.  
.00000028,-0.00000087,0.00000258,0.00000697,0.00000074,-0.00000274,-0.  
00000187,0.00000289,0.00001064,-0.00000091,-0.00000055,-0.00000868,0.0  
0000160,0.00001148,0.00001070,0.00001061,-0.00001159,0.00000322,0.0000  
0587,0.00000635,-0.00000635,0.00000431,0.00000457,0.00000899,0.0000010  
7,0.00000440,0.00000177,0.00000107,-0.00000609,0.00000996,-0.00000362,  
-0.00000097,0.00000337,0.00000413,-0.00000493,0.00000435,-0.00000467,0.  
.00000520,0.00000311,0.00000790,-0.00000251,0.00001435,-0.00000916,-0.  
00001133,-0.00001308,0.00000034,-0.00000310,0.00489788,0.00277096,0.00

222520,-0.13873155,-0.03721059,-0.07718328,0.02488662,-0.04079342,0.01  
569363,0.00340023,0.00135151,-0.00280201,-0.03330985,-0.00592272,-0.02  
935100,-0.00101888,-0.00009456,-0.00018122,0.01343409,0.05596243,0.005  
70505,0.00456149,-0.00041850,-0.00244060,-0.17502200,0.03357917,-0.126  
06189,-0.00726746,0.00821957,-0.01061831,0.38046850,-0.00000643,0.0002  
4538,0.00008458,-0.00000294,-0.00007031,-0.00009825,-0.00015027,0.0010  
1641,-0.00003830,0.01325424,0.01566781,0.01318017,0.00304834,0.0029736  
6,0.00333816,-0.00011654,-0.00022851,0.00006880,0.00000539,0.00002121,  
0.00006670,0.00094218,0.00071148,0.00013470,0.00012533,-0.00009202,-0.  
00018304,-0.00013340,0.00012378,0.00015132,0.00022489,-0.00004074,-0.0  
0006872,-0.00010387,-0.00008721,0.00009102,-0.00000496,0.00000095,0.00  
001568,0.00009129,0.00006847,-0.00008822,0.00002578,-0.00003879,0.0000  
3133,-0.00001406,-0.00041795,0.00027534,-0.00002411,0.00005271,0.00001  
334,0.00000649,-0.00003987,-0.00000345,-0.00000288,0.00000031,-0.00000  
345,0.00000401,-0.00000267,0.00000331,0.00000168,-0.00000366,0.0000011  
9,0.00000083,0.00000014,-0.00000032,-0.00000152,-0.00000257,-0.0000039  
3,0.00000073,-0.00000014,-0.00000087,-0.00000524,-0.00000741,-0.000002  
52,-0.00000003,-0.00000027,-0.00000559,-0.00001862,0.00001314,-0.00001  
077,0.00000969,0.00000060,-0.00000524,0.00000641,-0.00002074,-0.000017  
99,0.00000563,0.00000598,0.00000347,0.00000104,-0.00000286,-0.00000441  
, -0.00000308,-0.00000285,-0.00000242,0.00000148,-0.00000070,-0.0000020  
2,-0.00000801,0.00000115,0.00000271,0.00000101,-0.00000073,0.00000115,  
-0.00000427,-0.00000088,-0.00000090,-0.00000404,-0.00000608,0.00000453  
, -0.00002008,0.00000755,0.00000581,0.00000769,-0.00001075,0.00000953,0  
.00055541,-0.00480271,0.00213091,-0.08335280,-0.19320233,-0.08921339,-  
0.01360712,-0.03384437,-0.01509644,0.00131313,-0.00503152,0.00132598,-  
0.00352812,-0.00277392,-0.00393307,-0.00007902,0.00078508,0.00002815,0  
.02291536,-0.01806095,0.02484426,0.00019945,-0.00541363,0.00010240,0.0  
7686624,-0.16210538,0.08294256,-0.01284391,0.01085315,-0.01392055,-0.0  
2275540,0.71970948,0.00003298,-0.00028714,0.00007957,-0.00002016,0.000  
08418,0.00002067,-0.00160406,-0.00168751,-0.00101807,-0.03714950,-0.00  
865983,-0.03496625,0.00080662,-0.00245674,-0.00018904,0.00010286,0.000  
24114,-0.00015230,-0.00000100,-0.00001643,0.00003269,-0.00095824,0.000  
25455,-0.00056533,-0.00006821,-0.00015000,-0.00003409,-0.00002143,-0.0  
0000585,0.00014208,-0.00015494,-0.00019834,0.00004943,0.00000353,-0.00  
002637,0.00002898,-0.00001319,0.00000943,-0.00000797,-0.00008671,0.000  
10580,-0.00001648,-0.00001945,0.00002046,-0.00002642,0.00021143,0.0001  
2286,0.00001977,0.00001415,-0.00005660,-0.00003539,-0.00000511,0.00003  
975,-0.00001640,-0.00000116,-0.00001071,-0.00001361,0.00000058,-0.0000  
0145,0.00000396,-0.00000079,0.00000034,-0.00000057,-0.00000308,0.00000  
267,-0.00000239,0.00000069,-0.00000012,0.00000062,-0.00000257,-0.00000  
016,-0.00000280,-0.00000062,0.00001066,-0.00000097,-0.00000078,-0.0000  
0236,0.00000284,0.00000914,-0.00000254,0.00000468,-0.00000489,0.000003  
65,0.00001210,0.00000075,0.00003216,-0.00001563,-0.00000404,0.00000961  
, 0.00000135,-0.00000016,0.00000009,0.00000904,0.00000110,0.00000842,0.  
00000399,0.00000122,-0.00000292,0.00000133,-0.00000105,-0.00000085,-0.  
00000209,0.00000353,-0.00000050,-0.00000032,-0.00000267,-0.00000517,-0.  
.00000151,0.00000412,0.00000241,0.00000149,0.00001115,-0.00000708,-0.0  
0001387,-0.00000575,-0.00000359,-0.00000121,0.00450794,0.00350034,0.00  
473810,-0.07861900,-0.03990728,-0.14980522,0.01664741,-0.04476619,0.02  
626181,-0.00243866,0.00163052,0.00302314,-0.02945669,-0.00613335,-0.03  
754240,-0.00022928,-0.00009888,-0.00104027,0.00594402,0.06021121,0.014  
59837,-0.00245736,-0.00047011,0.00415907,-0.12644648,0.03610476,-0.195  
03184,-0.01070957,0.00891555,-0.00898293,0.27631954,-0.02297211,0.4243  
2462,0.00005913,0.00004048,-0.00003967,-0.00002398,-0.00001011,0.00001  
149,0.00015571,0.00025649,-0.00005613,-0.00083565,-0.00138503,0.002662  
61,0.00005079,0.00028533,-0.00092937,-0.00007510,-0.00007636,0.0000589  
2,0.00002181,-0.00000428,0.00001026,0.00004460,0.00001858,-0.00008019,  
0.00007209,-0.00002125,0.00005115,0.00001429,-0.00000373,0.00001142,0.  
00007908,0.00006335,-0.00005001,-0.00003562,-0.00000478,0.00000735,0.0  
0000109,-0.00000215,0.00000078,0.00000821,0.00002453,-0.00001063,0.000  
00092,-0.00000495,-0.00000181,-0.00001732,-0.00003667,0.00003548,-0.00  
001012,-0.00000066,-0.00001080,-0.00000934,-0.00000692,0.00000625,-0.0  
0000175,0.00000006,0.00000078,0.00000126,0.00000068,-0.00000070,0.0000

0054,-0.00000003,0.00000060,0.00000082,0.00000032,-0.00000047,-0.00000058,-0.00000088,-0.00000018,0.00000067,0.00000014,-0.00000038,-0.00000161,-0.00000095,-0.00000062,0.00000137,0.00000035,-0.00000099,-0.00000417,0.00000039,0.00000171,0.00000381,0.00000018,-0.00000345,-0.00000756,0.00000490,0.00000295,-0.00000294,-0.00000138,-0.00000458,0.00000368,-0.00000282,-0.00000072,-0.000000665,0.00000178,-0.00000074,-0.00000062,-0.00000173,0.00000384,-0.000000817,0.00000295,0.00000048,-0.00000108,-0.00000283,0.00000383,-0.00000303,0.00000268,-0.00000506,-0.00000121,-0.00000616,0.00000305,-0.00000754,0.00000436,0.00000274,0.00000859,-0.00000205,0.00000260,-0.00070366,-0.00019051,0.00006985,0.00424180,-0.01635832,0.00087336,0.00074997,-0.00179896,-0.00453542,0.00037245,-0.00079673,0.00006918,-0.00091332,-0.00001866,-0.00016745,-0.00041878,0.00001966,0.00048566,0.00157110,0.00097511,-0.00604905,0.00014103,0.00098385,-0.00021226,0.00213117,0.02060197,-0.00037308,-0.00180827,-0.00026812,0.00254633,-0.04575501,0.01717699,-0.01413617,0.04091709,-0.0000796,0.00004520,-0.00005589,0.00000480,-0.00001231,0.00001850,0.00012362,0.00034281,0.00005134,0.00156684,0.00135667,0.00172735,-0.00130615,0.00034080,-0.00158887,-0.00000947,-0.00003373,0.00003676,-0.00000268,0.00000404,-0.00002572,-0.00006218,-0.00008160,0.00000205,-0.00004768,0.00005224,0.00004877,0.00003022,-0.00002101,-0.00006630,0.00002320,0.00005656,-0.00003660,0.00000861,0.00000928,-0.00000801,0.00000663,-0.00000268,-0.00000286,0.00000475,-0.00000559,0.00000826,0.00000036,0.00000187,-0.00000230,-0.00000775,0.00004307,-0.00002129,0.00001333,-0.00001051,-0.00000486,-0.00000044,-0.00000520,0.00000846,0.00000055,0.00000489,0.00000608,-0.00000113,0.00000142,-0.00000249,0.00000016,0.00000104,0.00000052,0.00000101,-0.00000093,0.00000087,0.00000035,0.00000059,0.00000101,0.00000097,-0.00000016,0.00000144,0.00000121,-0.00000314,-0.00000015,0.00000042,0.00000114,0.00000111,0.00000206,-0.00000288,0.00000169,-0.00000082,-0.00000224,-0.00000417,-0.00000125,-0.00000574,0.000001200,-0.00000105,-0.00000605,-0.00000120,-0.00000006,0.00000064,-0.00000264,0.00000113,-0.00000299,-0.00000118,-0.00000118,0.00000134,-0.00000013,0.00000243,0.00000010,0.00000058,-0.00000152,0.00000040,-0.00000059,0.00000158,0.00000182,0.00000284,-0.00000064,0.00000079,-0.00000167,0.00000004,0.00000139,0.00000412,0.00000067,0.00000290,-0.00000112,-0.00051004,0.00039065,-0.00044005,0.00456385,-0.01583663,0.00493669,-0.00290558,-0.00015187,-0.00309904,0.00046243,-0.00083234,0.00045622,-0.00018239,0.00067821,-0.00021363,0.00001149,-0.00009307,0.00001107,0.00180553,0.00157734,0.00193121,-0.00008270,-0.00058878,-0.00010256,-0.00060253,-0.00961281,-0.00072811,0.00012927,0.00086708,0.00018554,0.01642580,-0.32594596,0.01661959,-0.01945810,0.34747395,-0.00003474,0.00012979,-0.00003276,0.00001940,-0.00004202,-0.00000962,0.00001587,0.00019087,0.00016347,0.00260345,-0.00201070,-0.00035390,-0.00084728,0.00048898,-0.00023933,-0.00001112,-0.00007386,0.00004613,-0.00000727,0.00000905,-0.00003219,0.00000288,-0.00000456,0.00007037,-0.00004998,0.00006544,0.00003845,0.00000861,-0.00001038,-0.00007124,0.00005763,0.00004532,-0.00004454,-0.00000324,-0.00001373,0.00000614,0.00000714,-0.00000076,0.00000212,0.00001133,-0.00000636,-0.00000710,0.00000601,0.00000019,0.00000558,-0.00000714,-0.00001499,-0.00000182,0.00001027,0.00000512,0.00001117,0.00000581,-0.00001817,0.00000582,0.00000110,0.00000582,0.00000731,-0.00000093,0.00000064,-0.00000186,0.00000052,-0.00000009,0.00000013,0.00000119,-0.00000135,0.00000154,0.00000037,0.00000035,0.00000024,0.00000086,-0.00000008,0.00000158,0.00000099,-0.00000500,0.00000016,-0.00000030,0.00000090,-0.00000038,-0.00000204,0.00000097,-0.00000268,0.00000029,-0.00000237,-0.00000474,0.00000153,-0.00001815,0.00000789,0.00000356,-0.00000641,0.00000005,-0.00000175,0.00000092,-0.00000442,0.00000117,-0.00000494,-0.00000140,-0.00000038,0.00000190,-0.00000225,0.00000277,-0.00000005,0.00000102,-0.00000144,0.00000126,-0.00000054,0.00000390,0.00000333,0.00000219,-0.00000203,-0.00000023,-0.00000114,-0.000000373,0.00000262,0.00000636,0.00000089,0.00000327,0.00000007,0.00017185,-0.00010989,-0.00038691,0.00070549,-0.01716705,0.00405691,-0.00434054,-0.00194867,0.00026304,-0.00004488,-0.00088975,0.00027665,-0.00027136,-0.00004902,-0.00111554,0.00048410,0.00002637,-0.00034342,-0.00608021,0.00116423,0.00064409,-0.00020879,0.00108005,0.00011007,-0.00031838,0.02228073,0.00217442,0.00257159,-0.00027475,-0.00142134,-0.014210

35,0.01682785,-0.04803429,0.01974730,-0.01966265,0.04421047\\-0.000002  
18,0.00000556,0.00000379,-0.00000070,-0.00000099,0.00000111,0.00000168  
, -0.00000105,-0.00000152,-0.00000711,0.00000009,0.00000092,0.00000101,  
0.00000122,-0.00000177,0.00000012,-0.00000358,-0.00000532,0.00000200,0  
.00000102,0.00000197,-0.00000420,0.00000100,-0.00000145,0.00000211,-0.  
00000085,-0.00000078,-0.00000010,-0.00000021,0.00000041,-0.00000159,-0  
.00000240,0.00000329,-0.00000031,-0.00000027,0.00000020,0.00000027,0.,  
-0.00000017,-0.00000022,0.00000002,-0.00000051,0.00000007,-0.00000080,  
-0.00000046,0.00000147,-0.00000102,-0.00000002,0.00000017,-0.00000060,  
-0.00000050,0.00000176,-0.00000502,-0.00000382,0.00000250,0.00000089,-  
0.00000060,-0.00000121,0.00000041,-0.00000013,0.00000008,0.00000138,0.  
00000133,0.00000003,0.00000018,0.,0.00000034,-0.00000187,-0.00000070,0  
.00000041,0.00000030,-0.00000010,-0.00000079,0.00000192,-0.00000139,0.  
00000055,0.00000012,0.00000008,-0.00000129,0.00000081,0.00000385,0.000  
00162,0.00000077,-0.00000131,-0.00000088,0.00000046,-0.00000192,0.0000  
0067,0.00000090,-0.00000176,-0.00000136,0.00000015,0.00000111,0.000000  
38,0.00000159,0.00000182,0.00000017,0.00000130,0.00000062,-0.00000067,  
-0.00000045,0.00000019,-0.00000022,0.00000109,0.00000095,-0.00000082,0  
.00000135,0.00000064,-0.00000020,0.00000057,0.00000115,0.00000109,0.00  
000031,0.00000203,-0.00000203,0.00000042,0.00000022,0.00000535,-0.0000  
0071,0.00000237,0.00000273,-0.00000357,-0.00000212,-0.00000097,0.00000  
177,-0.00000102,-0.00000064,-0.00000012,-0.00000087,0.00000218,-0.0000  
0037,0.00000153,0.00000013,-0.00000022,-0.00000063,-0.00000101,-0.0000  
0284,-0.00000146,0.00000026,0.00000005,-0.00000031,-0.00000141,0.00000  
190,-0.00000128,-0.00000013,-0.00000057,0.00000025,0.00000185,0.000000  
46,0.00000235,-0.00000095,-0.00000049,-0.00000029\\@
